# Supplementary material
Source: Royal Society of Chemistry journal article supplement (doi:10.1039/d6ob00242k)
Supplement: d6ob00242k1.pdf [file d6ob00242k1.pdf]

*Supporting Information*

**Investigating tedizolid analogues as a new class of herbicides**

Caleb Hewlett,<sup>a</sup> Aleksandra Debowski,<sup>a,b</sup> Karen J. Deane,<sup>\*a</sup> and Keith A. Stubbs<sup>\*a,c</sup>

<sup>a</sup>*School of Molecular Sciences, University of Western Australia, Crawley, WA 6009, Australia*

<sup>b</sup>*School of Biomedical Sciences, University of Western Australia, Crawley, WA 6009,  
Australia*

<sup>c</sup>*ARC Training Centre for Next-Gen Technologies in Biomedical Analysis, School of  
Molecular Sciences, The University of Western Australia, Crawley, WA 6009, Australia.*

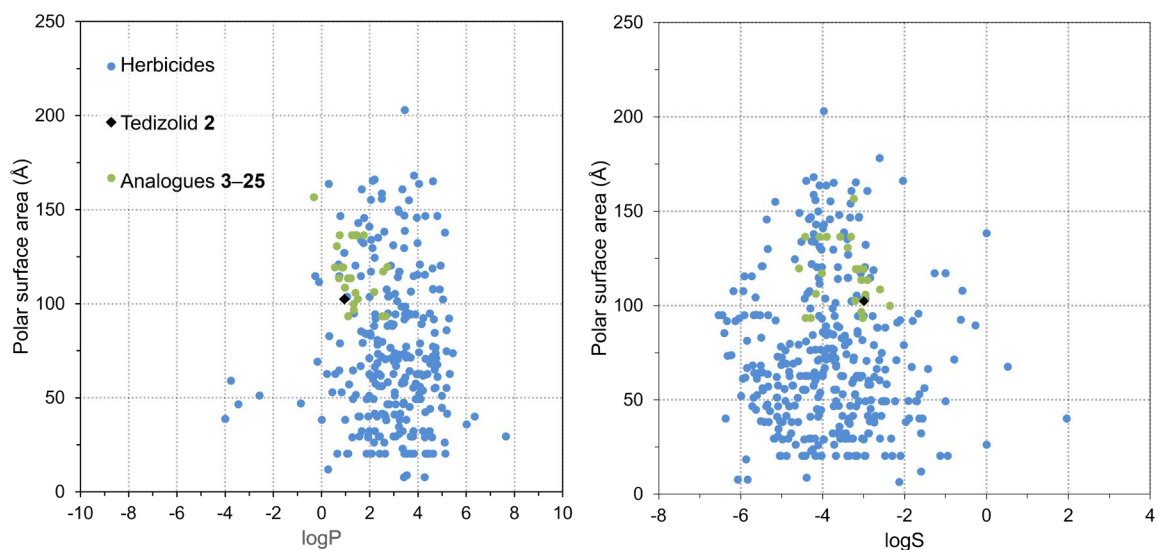

**Figure S1.** Cluster analysis of the physicochemical properties of tedizolid (**2**) and proposed analogues versus 360 commercial herbicides. An interactive database of physicochemical properties for commercial herbicides was used to extract these charts.<sup>1,2</sup> logP and logS were calculated using vcclab.org and all other properties computed using Marvin Sketch. Values for this work (green circles, **2** shown as black diamond) were plotted and the two properties compared.

**Table S1.** Synthesis of triazoles **27–49**. (a) CuSO<sub>4</sub>, sodium ascorbate, *t*-BuOH/H<sub>2</sub>O, 40 °C, 2.5 h.

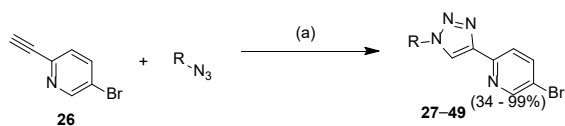

| Intermediate triazole | R | Yield (%) | Intermediate triazole | R | Yield (%) |
|-----------------------|---|-----------|-----------------------|---|-----------|
| 27                    |   | 77        | 38                    |   | 60        |
| 28                    |   | 81        | 39                    |   | 88        |
| 29                    |   | 99        | 40                    |   | 81        |
| 30                    |   | 98        | 41                    |   | 83        |
| 31                    |   | 81        | 42                    |   | 95        |
| 32                    |   | 87        | 43                    |   | 87        |
| 33                    |   | 55        | 44                    |   | 45        |
| 34                    |   | 95        | 45                    |   | 88        |
| 35                    |   | 90        | 46                    |   | 81        |
| 36                    |   | 86        | 47                    |   | 99        |
| 37                    |   | 76        | 48                    |   | 99        |
|                       |   |           | 49                    |   | 56        |

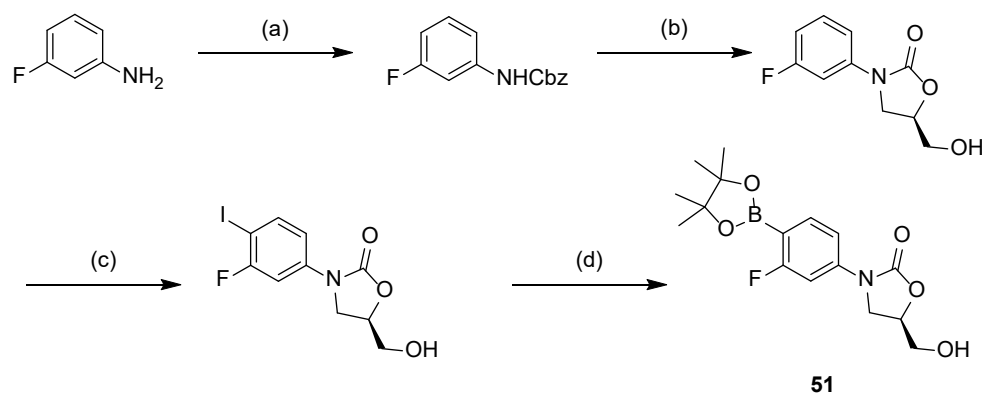

**Scheme S1.** Synthesis of boronic ester intermediate **51**.<sup>3-5</sup> (a) *N*-(Benzyloxycarbonyloxy)succinimide, THF, 40 °C, 82%; (b) (*R*)-glycidyl butyrate, *n*-BuLi, THF, -78 °C to rt, 87%; (c) *N*-iodosuccinimide, trifluoroacetic acid, rt, 78%; (d) Pd(dppf)<sub>2</sub>Cl<sub>2</sub>, bis(pinacolato)diboron, KOAc, DMSO, 80 °C, 90%.

## Herbicidal activity assay

The herbicidal activity of compounds was determined based upon the previously published method from Sukhoverkov *et. al.*<sup>6</sup>

## Antibacterial activity assay

The minimum inhibitory concentrations (MIC) against *Staphylococcus aureus* (ATCC 25923) and *Bacillus cereus* (ATCC10876) were determined as previously described.<sup>5</sup> Minimum Inhibitory Concentrations (MIC) were determined via the Broth Microdilution Method, as per the Clinical and Laboratory Standards Institute Approved Standards.<sup>7</sup> Compounds dissolved in Mueller Hinton broth with 4% DMSO, were added to 96-well plates with a 2-fold serial dilution. The bacteria were grown to exponential growth phase in Mueller Hinton broth, and 100 mL was added to the respective wells, at a concentration of  $5 \times 10^5$  CFU/mL, with a final DMSO concentration of 2%. Plates were then incubated at 37 °C for 18 h. MICs were recorded by visual inspection and confirmed by absorbance measured at 600 nm with each compound tested in triplicate.

## Experimental

### General

All reagents and materials were purchased from commercial suppliers unless otherwise specified. Thin layer chromatography (TLC) was performed on Merck silica gel 60 F254 aluminium-backed plates. Flash column chromatography was performed on Merck silica gel using the specified solvents. NMR spectra were obtained on a Bruker Avance IIIHD 400 (400 MHz for <sup>1</sup>H, 100.6 MHz for <sup>13</sup>C), 500 (500 MHz for <sup>1</sup>H and 125.8 MHz for <sup>13</sup>C) or 600 (600 MHz for <sup>1</sup>H and 150.9 MHz for <sup>13</sup>C) spectrometers. The solvents used were CDCl<sub>3</sub>, CD<sub>3</sub>OD, DMSO-*d*<sub>6</sub>, CD<sub>3</sub>CN or (CD<sub>3</sub>)<sub>2</sub>CO, with CHCl<sub>3</sub> (<sup>1</sup>H, δ 7.26 ppm), CDCl<sub>3</sub> (<sup>13</sup>C, δ 77.16 ppm), CD<sub>2</sub>HOD (<sup>1</sup>H, δ 3.31 ppm), CD<sub>3</sub>OD (<sup>13</sup>C, δ 49.00 ppm), CD<sub>3</sub>S(O)CD<sub>2</sub>H (<sup>1</sup>H, δ 2.50 ppm), (CD<sub>3</sub>)<sub>2</sub>SO (<sup>13</sup>C, δ 39.52 ppm), CD<sub>2</sub>HCN (<sup>1</sup>H, δ 1.94 ppm), CD<sub>3</sub>CN (<sup>13</sup>C, δ 118.26 ppm), CD<sub>2</sub>HCD<sub>3</sub>CO (<sup>1</sup>H, δ 2.05 ppm) or (CD<sub>3</sub>)<sub>2</sub>CO (<sup>13</sup>C, δ 29.84 ppm) used as an internal standard. Infrared spectra were recorded using a PerkinElmer spectrum one FT-IR spectrometer fitted with a PerkinElmer Universal Attenuated Total Reflectance (ATR) sampling accessory. High resolution mass spectra (HR-MS) were obtained on a Orbitrap Exploris 120 spectrometer, using the ESI equipped ion source in positive mode.

### General Procedure A

5-Bromo-2-ethynylpyridine **26** (1.0 equiv.) and the relevant azide (2.0 equiv.) were dissolved in *t*-BuOH (4.6 mL/mmol). A solution of CuSO<sub>4</sub> (0.1 equiv.) and sodium ascorbate (0.5 equiv.) in H<sub>2</sub>O (4.6 mL/mmol) was added and the mixture was stirred at 40 °C (1–2 h). The mixture was allowed to cool to room temperature (rt), concentrated under reduced pressure, dispersed in H<sub>2</sub>O and extracted with EtOAc. The organic extracts were combined, washed with H<sub>2</sub>O and brine, dried over anhydrous MgSO<sub>4</sub>, filtered and concentrated under reduced pressure before being purified by flash column chromatography (FCC) to afford the desired compound.

### General Procedure B

The relevant triazole-containing compound (1.0 equiv.) and the boronic ester **51** (1.2 equiv.) were dissolved in 1,4-dioxane (14.6 mL/mmol) and saturated Na<sub>2</sub>CO<sub>3</sub> solution (4.2 mL/mmol). The mixture was sparged with N<sub>2</sub> (10 min) before addition of Pd(PPh<sub>3</sub>)<sub>4</sub> (5 mol%). The mixture further sparged with N<sub>2</sub> (3 min) before being heated at 100 °C under N<sub>2</sub> atmosphere (18 h). After cooling the reaction to rt, the solvent was removed *in vacuo* and the mixture was purified by FCC to afford the desired compound.

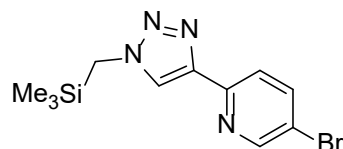

### 5-Bromo-2-{1-[(trimethylsilyl)methyl]-1*H*-1,2,3-triazol-4-yl}pyridine (**27**)

The title compound **27** was synthesised as a light brown solid (67 mg, 62%) according to general procedure A. <sup>1</sup>H NMR (400 MHz, CDCl<sub>3</sub>): δ 8.61 (d, *J* = 2.0 Hz, 1H), 8.07 (d, *J* = 8.4 Hz, 1H), 7.99 (s, 1H), 7.88 (dd, *J* = 8.4, 2.0 Hz, 1H), 3.97 (s, 2H), 0.18 (s, 9H); <sup>13</sup>C NMR (100.6 MHz, CDCl<sub>3</sub>): δ 150.4, 149.1, 147.3, 139.7, 122.9, 121.5, 119.4, 42.5, -2.3; R<sub>f</sub> = 0.18 (EtOAc:hexanes, 3:17); FT-IR (ATR): ν 2795, 1591 cm<sup>-1</sup>; HR-MS (ESI): *m/z* [M+H]<sup>+</sup> calculated for C<sub>11</sub>H<sub>16</sub>N<sub>4</sub><sup>79</sup>BrSi<sup>+</sup>: 311.0322, found: 311.0321.

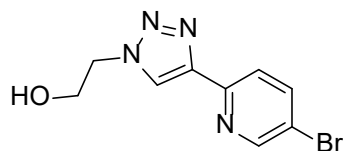

**28**

2-[4-(5-Bromopyridin-2-yl)-1H-1,2,3-triazol-1-yl]ethan-1-ol (**28**)

The title compound **28** was synthesised as a white solid (66 mg, 81%) according to general procedure A. <sup>1</sup>H NMR (600 MHz, CDCl<sub>3</sub>): δ 8.52 (d, *J* = 2.2 Hz, 1H), 8.21 (s, 1H), 7.94 (d, *J* = 8.4 Hz, 1H), 7.87 (dd, *J* = 8.4, 2.2 Hz), 4.54 (t, *J* = 5.0 Hz, 2H), 4.13 (t, *J* = 5.0 Hz, 2H); <sup>13</sup>C NMR (150.9 MHz, CDCl<sub>3</sub>): δ 150.2, 148.4, 147.0, 139.7, 123.6, 121.3, 119.5, 61.1, 53.1; R<sub>f</sub> = 0.40 (MeOH:CHCl<sub>3</sub>, 1:19); FT-IR (ATR): ν 3260 (O-H) cm<sup>-1</sup>; HR-MS (ESI): *m/z* [M+H]<sup>+</sup> calculated for C<sub>9</sub>H<sub>10</sub>N<sub>4</sub>O<sup>79</sup>Br<sup>+</sup>: 269.0032, found: 269.0029.

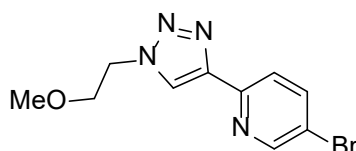

**29**

5-Bromo-2-[1-(2-methoxyethyl)-1H-1,2,3-triazol-4-yl]pyridine (**29**)

The title compound **29** was synthesised as a white solid (84 mg) quantitatively according to general procedure A. <sup>1</sup>H NMR (400 MHz, CDCl<sub>3</sub>): δ 8.63 (d, *J* = 2.0 Hz, 1H), 8.25 (s, 1H), 8.08 (d, *J* = 8.4 Hz, 1H), 7.90 (dd, *J* = 8.4, 2.0 Hz, 1H), 4.60 (t, *J* = 4.9 Hz, 2H), 3.80 (t, *J* = 4.9 Hz, 2H), 3.37 (s, 3H); <sup>13</sup>C NMR (100.6 MHz, CDCl<sub>3</sub>): δ 150.4, 148.9, 147.4, 139.8, 123.5, 121.6, 119.5, 70.7, 59.2, 50.6; R<sub>f</sub> = 0.26 (EtOAc:hexanes, 1:1); FT-IR (ATR): ν 1595 cm<sup>-1</sup>; HR-MS (ESI): *m/z* [M+H]<sup>+</sup> calculated for C<sub>10</sub>H<sub>12</sub>N<sub>4</sub>O<sup>79</sup>Br<sup>+</sup>: 283.0189, found: 283.0187.

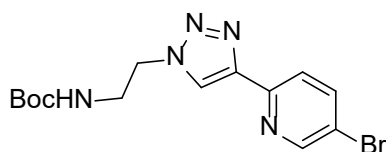

**30**

*tert*-Butyl N-{2-[4-(5-bromopyridin-2-yl)-1H-1,2,3-triazol-1-yl]ethyl}carbamate (**30**)

The title compound **30** was synthesised as a yellow solid (106 mg, 98%) according to general procedure A. <sup>1</sup>H NMR (500 MHz, CD<sub>3</sub>CN): δ 8.68 (br s, 1H), 8.25 (s, 1H), 8.04–7.99 (m, 2H), 5.50 (s, 1H), 4.48 (t, *J* = 5.8 Hz, 2H), 3.52 (td, *J* = 5.8, 5.8 Hz, 2H), 1.34 (s, 9H); <sup>13</sup>C NMR (125.8 MHz, CD<sub>3</sub>CN): δ 156.7, 151.4, 150.2, 147.8, 140.5, 124.3, 122.0, 119.9, 79.6, 50.9,

41.2, 28.5;  $R_f = 0.49$  (MeOH/CHCl<sub>3</sub>, 1:19); FT-IR (ATR):  $\nu$  3200 (N-H), 1722 (C=O) cm<sup>-1</sup>; HR-MS (ESI):  $m/z$  [M+H]<sup>+</sup> calculated for C<sub>14</sub>H<sub>19</sub>N<sub>5</sub>O<sub>2</sub><sup>79</sup>Br<sup>+</sup>: 368.0717, found: 368.0716.

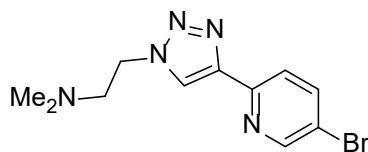

**31**

{2-[4-(5-Bromopyridin-2-yl)-1H-1,2,3-triazol-1-yl]ethyl}dimethylamine (**31**)

The title compound **31** was synthesised as a white solid (67 mg, 81%) according to general procedure A. <sup>1</sup>H NMR (400 MHz, CDCl<sub>3</sub>):  $\delta$  8.62 (d,  $J = 1.9$  Hz, 1H), 8.26 (s, 1H), 8.07 (d,  $J = 8.4$  Hz, 1H), 7.89 (dd,  $J = 8.4, 1.9$  Hz, 1H), 4.53 (t,  $J = 6.2$  Hz, 2H), 2.84 (t,  $J = 6.2$  Hz, 2H), 2.32 (s, 6H); <sup>13</sup>C NMR (150.9 MHz, CDCl<sub>3</sub>):  $\delta$  150.6, 149.1, 147.5, 139.6, 123.0, 121.5, 119.5, 58.8, 48.4, 45.5;  $R_f = 0.49$  (MeOH:CHCl<sub>3</sub>, 1:19); FT-IR (ATR):  $\nu$  1592 cm<sup>-1</sup>; HR-MS (ESI):  $m/z$  [M+H]<sup>+</sup> calculated for C<sub>11</sub>H<sub>15</sub>N<sub>5</sub><sup>79</sup>Br<sup>+</sup>: 296.0505, found: 296.0505.

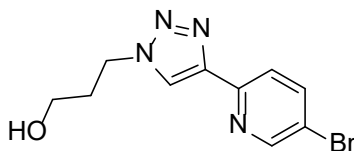

**32**

3-[4-(5-Bromopyridin-2-yl)-1H-1,2,3-triazol-1-yl]propan-1-ol (**32**)

The title compound **32** was synthesised as a white solid (70 mg, 87%) according to general procedure A. <sup>1</sup>H NMR (400 MHz, CDCl<sub>3</sub>):  $\delta$  8.61 (d,  $J = 2.0$  Hz, 1H), 8.21 (s, 1H), 8.07 (d,  $J = 8.5$  Hz, 1H), 7.91 (dd,  $J = 8.5, 2.0$  Hz, 1H), 4.60 (t,  $J = 6.8$  Hz, 2H), 3.69 (t,  $J = 5.8$  Hz, 2H), 2.19 (tt,  $J = 6.8, 5.8$  Hz, 2H); <sup>13</sup>C NMR (100.6 MHz, CDCl<sub>3</sub>):  $\delta$  150.3, 148.7, 147.3, 140.0, 123.0, 121.6, 119.7, 58.7, 47.3, 32.6;  $R_f = 0.21$  (EtOAc:hexanes, 8:2); FT-IR (ATR):  $\nu$  3401 (O-H) cm<sup>-1</sup>; HR-MS (ESI):  $m/z$  [M+H]<sup>+</sup> calculated for C<sub>10</sub>H<sub>12</sub>N<sub>4</sub>O<sup>79</sup>Br<sup>+</sup>: 283.0189, found: 283.0186.

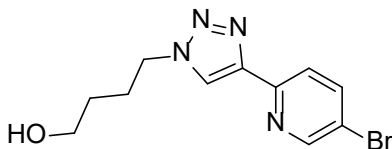

**33**

4-[4-(5-Bromopyridin-2-yl)-1H-1,2,3-triazol-1-yl]butan-1-ol (**33**)

The title compound **33** was synthesised as a white solid (24 mg, 29%) according to general procedure A. <sup>1</sup>H NMR (600 MHz, CDCl<sub>3</sub>):  $\delta$  8.61 (d,  $J = 1.3$  Hz, 1H), 8.14 (s, 1H), 8.06 (d,  $J$

= 8.4 Hz, 1H), 7.89 (dd,  $J = 8.4, 2.1$  Hz), 4.48 (t,  $J = 7.1$  Hz, 2H), 3.70 (t,  $J = 6.2$  Hz, 2H), 2.08 (tt,  $J = 7.1, 6.2$  Hz, 2H), 1.62 (tt,  $J = 7.1, 6.2$  Hz, 2H);  $^{13}\text{C}$  NMR (150.9 MHz,  $\text{CDCl}_3$ ):  $\delta$  150.5, 148.9, 147.6, 139.7, 122.3, 121.5, 119.6, 62.0, 50.5, 29.3, 27.0;  $R_f = 0.12$  (MeOH: $\text{CHCl}_3$ , 1:99); FT-IR (ATR):  $\nu$  3418 (O-H)  $\text{cm}^{-1}$ ; HR-MS (ESI):  $m/z$   $[\text{M}+\text{H}]^+$  calculated for  $\text{C}_{11}\text{H}_{14}\text{N}_4\text{O}^{79}\text{Br}^+$ : 297.0346, found: 297.0342.

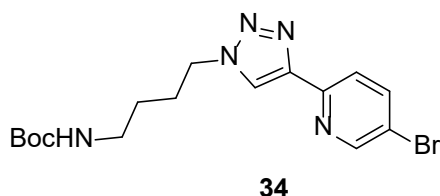

*tert*-Butyl N-{4-[4-(5-bromopyridin-2-yl)-1H-1,2,3-triazol-1-yl]butyl}carbamate (**34**)

The title compound **34** was synthesised as a white solid (107 mg, 95%) according to general procedure A.  $^1\text{H}$  NMR (500 MHz,  $(\text{CD}_3)_2\text{CO}$ ):  $\delta$  8.66–8.65 (m, 1H), 8.46 (s, 1H), 8.07 (m, 2H), 6.03 (br s, 1H), 4.54 (t,  $J = 7.1$  Hz, 2H), 3.14 (dt,  $J = 7.1, 6.4$  Hz, 2H), 2.01 (tt,  $J = 7.1, 7.1$  Hz, 2H), 1.54 (tt, 7.1, 7.1 Hz, 2H), 1.39 (s, 9H);  $^{13}\text{C}$  NMR (125.8 MHz,  $(\text{CD}_3)_2\text{CO}$ ):  $\delta$  156.8, 151.3, 150.6, 147.8, 140.4, 123.7, 121.8, 119.5, 78.5, 50.5, 40.2, 28.6, 28.3, 27.8;  $R_f = 0.47$  (MeOH: $\text{CHCl}_3$ , 1:19); FT-IR (ATR):  $\nu$  3391 (N-H), 1678 (C=O)  $\text{cm}^{-1}$ ; HR-MS (ESI):  $m/z$   $[\text{M}+\text{H}]^+$  calculated for  $\text{C}_{16}\text{H}_{23}\text{N}_5\text{O}_2^{79}\text{Br}^+$ : 396.1030, found: 396.1030.

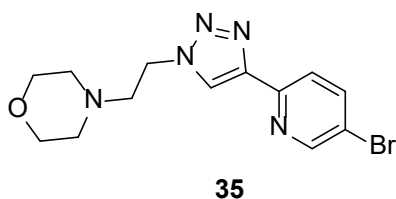

4-{2-[4-(5-Bromopyridin-2-yl)-1H-1,2,3-triazol-1-yl]ethyl}morpholine (**35**)

The title compound **35** was synthesised as a white solid (88 mg, 90%) according to general procedure A.  $^1\text{H}$  NMR (400 MHz,  $(\text{CD}_3)_2\text{CO}$ ):  $\delta$  8.67–8.66 (m, 1H), 8.49 (s, 1H), 8.08–8.07 (m, 2H), 4.63 (t,  $J = 6.2$  Hz, 2H), 3.59 (t,  $J = 4.6$  Hz, 4H), 2.89 (t,  $J = 6.2$  Hz, 2H), 2.51 (t,  $J = 4.6$  Hz, 4H);  $^{13}\text{C}$  NMR (100.6 MHz,  $(\text{CD}_3)_2\text{CO}$ ):  $\delta$  151.2, 150.6, 147.6, 140.3, 124.2, 121.8, 119.5, 67.4, 58.6, 54.3, 48.0;  $R_f = 0.59$  (MeOH: $\text{CHCl}_3$ , 1:9); FT-IR (ATR):  $\nu$  1590  $\text{cm}^{-1}$ ; HR-MS (ESI):  $m/z$   $[\text{M}+\text{H}]^+$  calculated for  $\text{C}_{13}\text{H}_{17}\text{N}_5\text{O}^{79}\text{Br}^+$ : 338.0611, found: 338.0610.

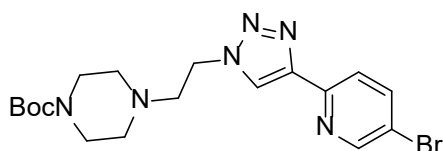

**36**

*tert*-Butyl 4-{2-[4-(5-bromopyridin-2-yl)-1*H*-1,2,3-triazol-1-yl]ethyl}piperazine-1-carboxylate (**36**)

The title compound (**36**) was synthesised according as a light brown solid (106 mg, 86%) to general procedure A. <sup>1</sup>H NMR (600 MHz, CD<sub>3</sub>OD): δ 8.66 (d, *J* = 1.7 Hz, 1H), 8.49 (s, 1H), 8.06 (dd, *J* = 8.5, 1.7 Hz, 1H), 7.98 (d, *J* = 8.5 Hz, 1H), 4.61 (t, *J* = 6.1 Hz, 2H), 3.40 (m, 4H), 2.90 (t, *J* = 6.1 Hz, 2H), 2.49 (m, 4H), 1.45 (s, 9H); <sup>13</sup>C NMR (150.9 MHz, CDCl<sub>3</sub>): δ 156.4, 151.6, 150.0, 147.9, 141.2, 125.0, 122.5, 120.6, 81.2, 58.4, 53.8, 49.0, 44.8, 28.6; *R*<sub>f</sub> = 0.16 (EtOAc:hexanes, 1:1); FT-IR (ATR): ν 1692 (C=O) cm<sup>-1</sup>; HR-MS (ESI): *m/z* [M+H]<sup>+</sup> calculated for C<sub>18</sub>H<sub>26</sub>N<sub>6</sub>O<sub>2</sub><sup>79</sup>Br<sup>+</sup>: 437.1295, found: 437.1293.

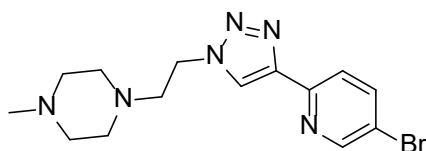

**37**

1-{2-[4-(5-Bromopyridin-2-yl)-1*H*-1,2,3-triazol-1-yl]ethyl}-4-methylpiperazine (**37**)

The title compound **37** was synthesised as a light brown solid (76 mg, 76%) according to general procedure A. <sup>1</sup>H NMR (400 MHz, CD<sub>3</sub>OD): δ 8.66 (d, *J* = 1.9 Hz, 1H), 8.49 (s, 1H), 8.06 (dd, *J* = 8.5, 1.9 Hz, 1H), 7.98 (d, *J* = 8.5 Hz, 1H), 4.61 (t, *J* = 6.2 Hz, 2H), 2.90 (t, *J* = 6.2 Hz, 2H), 2.59–2.44 (m, 8H), 2.28 (s, 3H); <sup>13</sup>C NMR (100.6 MHz, CD<sub>3</sub>OD): δ 151.6, 150.0, 147.9, 141.2, 124.9, 122.5, 120.6, 58.2, 55.8, 53.4, 45.9; *R*<sub>f</sub> = 0.30 (MeOH:CHCl<sub>3</sub>, 1:9); FT-IR (ATR): ν 2795, 1591 cm<sup>-1</sup>; HR-MS (ESI): *m/z* [M+H]<sup>+</sup> calculated for C<sub>14</sub>H<sub>20</sub>N<sub>6</sub><sup>79</sup>Br<sup>+</sup>: 351.0927, found: 351.0926.

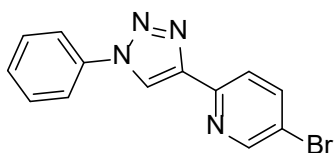

**38**

5-Bromo-2-(1-phenyl-1*H*-1,2,3-triazol-4-yl)pyridine (**38**)

The title compound **38** was synthesised as an orange solid (50 mg, 60%) according to general procedure A. As a result of insolubility and restricted rotation, this compound was unable to be characterised by NMR before being carried forward. *R*<sub>f</sub> = 0.36 (EtOAc:hexanes, 3:17); FT-IR

(ATR):  $\nu$  3077, 1593  $\text{cm}^{-1}$ ; HR-MS (ESI):  $m/z$   $[\text{M}+\text{H}]^+$  calculated for  $\text{C}_{13}\text{H}_{10}\text{N}_4^{79}\text{Br}^+$ : 301.0083, found: 301.0082.

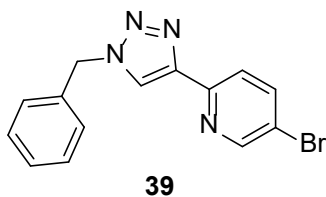

2-(1-Benzyl-1*H*-1,2,3-triazol-4-yl)-5-bromopyridine (**39**)

The title compound **39** was afforded as a white solid (81 mg, 88%) according to general procedure A.  $^1\text{H}$  NMR (400 MHz,  $\text{CDCl}_3$ ):  $\delta$  8.58 (d,  $J = 2.4$  Hz, 1H), 8.08 (d,  $J = 8.4$  Hz, 1H), 8.06 (s, 1H), 7.90 (dd,  $J = 8.4, 2.4$  Hz, 1H), 7.42–7.32 (m, 5H), 5.58 (s, 2H). All spectroscopic data matched that reported in the literature.<sup>8</sup>

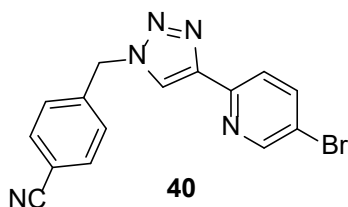

4-([4-(5-Bromopyridin-2-yl)-1*H*-1,2,3-triazol-1-yl]methyl)benzotrile (**40**)

The title compound (**40**) was synthesised as a light brown solid (79 mg, 81%) according to general procedure A.  $^1\text{H}$  NMR (400 MHz,  $\text{DMSO}-d_6$ ):  $\delta$  8.77 (s, 1H), 8.72 (dd,  $J = 2.4, 0.7$  Hz, 1H), 8.15 (dd,  $J = 8.4, 2.4$  Hz, 1H), 7.99 (dd,  $J = 8.4, 0.7$  Hz, 1H), 7.88–7.85 (m, 2H), 7.53–7.50 (m, 2H), 5.80 (s, 2H);  $^{13}\text{C}$  NMR (100.6 MHz,  $\text{DMSO}-d_6$ ):  $\delta$  150.4, 148.6, 146.6, 141.3, 140.0, 132.8, 128.8, 124.2, 121.2, 119.0, 118.6, 111.1, 52.5;  $R_f = 0.12$  (EtOAc:hexanes, 7:13); FT-IR (ATR):  $\nu$  2224 ( $\text{C}\equiv\text{N}$ )  $\text{cm}^{-1}$ ; HR-MS (ESI):  $m/z$   $[\text{M}+\text{H}]^+$  calculated for  $\text{C}_{15}\text{H}_{11}\text{N}_5^{79}\text{Br}^+$ : 340.0192, found: 340.0193.

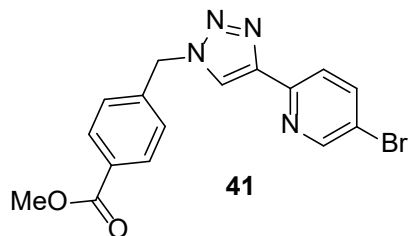

Methyl 4-([4-(5-bromopyridin-2-yl)-1*H*-1,2,3-triazol-1-yl]methyl)benzoate (**41**)

The title compound **41** was synthesised as a white solid (88 mg, 83%) according to general procedure A.  $^1\text{H}$  NMR (500 MHz,  $\text{DMSO}-d_6$ ):  $\delta$  8.77 (s, 1H), 8.72 (d,  $J = 1.9$  Hz, 1H), 8.14 (dd,  $J = 8.4, 1.9$  Hz, 1H), 7.99 (d,  $J = 8.4$  Hz, 1H), 7.98–7.95 (m, 2H), 7.48–7.46 (m, 2H), 5.78

(s, 2H), 3.84 (s, 3H);  $^{13}\text{C}$  NMR (125.8 MHz, DMSO- $d_6$ ):  $\delta$  166.3, 150.8, 149.1, 147.0, 141.5, 140.4, 130.1, 129.8, 128.6, 124.5, 121.6, 119.4, 53.1, 52.7;  $R_f$  = 0.53 (EtOAc:hexanes, 1:1); FT-IR (ATR):  $\nu$  1714 (C=O)  $\text{cm}^{-1}$ ; HR-MS (ESI):  $m/z$   $[\text{M}+\text{H}]^+$  calculated for  $\text{C}_{16}\text{H}_{14}\text{N}_4\text{O}_2^{79}\text{Br}^+$ : 373.0295, found: 373.0293.

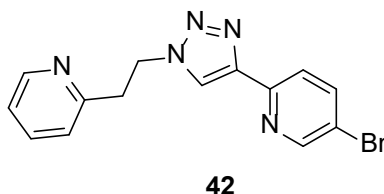

5-Bromo-2-{1-[2-(pyridin-2-yl)ethyl]-1H-1,2,3-triazol-4-yl}pyridine (**42**)

The title compound **42** was synthesised as a light brown solid (67 mg, 62%) according to general procedure A.  $^1\text{H}$  NMR (400 MHz,  $\text{CDCl}_3$ ):  $\delta$  8.59 (br s, 1H), 8.58 (d,  $J$  = 2.1 Hz, 1H), 8.03 (d,  $J$  = 8.5 Hz, 1H), 7.97 (s, 1H), 7.86 (dd,  $J$  = 8.5, 2.1 Hz, 1H), 7.59 (ddd,  $J$  = 7.6, 7.6, 2.1 Hz, 1H), 7.19 (ddd,  $J$  = 7.6, 5.0, 0.7 Hz, 1H), 7.08 (d,  $J$  = 7.6 Hz, 1H), 4.91 (t,  $J$  = 7.0 Hz, 2H), 3.47 (t,  $J$  = 7.0 Hz, 2H);  $^{13}\text{C}$  NMR (100.6 MHz,  $\text{CDCl}_3$ ):  $\delta$  156.5, 150.6, 149.1, 148.9, 147.3, 139.5, 137.6, 124.2, 122.8, 122.5, 121.5, 119.5, 49.6, 38.0;  $R_f$  = 0.30 (EtOAc); FT-IR (ATR):  $\nu$  3111, 1591  $\text{cm}^{-1}$ ; HR-MS (ESI):  $m/z$   $[\text{M}+\text{H}]^+$  calculated for  $\text{C}_{14}\text{H}_{13}\text{N}_5^{79}\text{Br}^+$ : 330.0349, found: 330.0347.

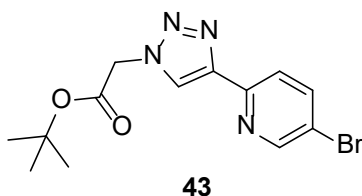

*tert*-Butyl 2-[4-(5-bromopyridin-2-yl)-1H-1,2,3-triazol-1-yl]acetate (**43**)

The title compound **43** was afforded as a yellow solid (162 mg, 98%) according to general procedure A.  $^1\text{H}$  NMR (400 MHz,  $(\text{CD}_3)_2\text{CO}$ ):  $\delta$  8.67 (br s, 1H), 8.52 (s, 1H), 8.09 (m, 2H), 5.34 (s, 2H), 1.48 (s, 9H);  $^{13}\text{C}$  NMR (100.6 MHz,  $(\text{CD}_3)_2\text{CO}$ ):  $\delta$  166.7, 151.3, 150.3, 147.9, 140.4, 125.3, 121.9, 119.7, 83.4, 52.2, 28.1;  $R_f$  = 0.21 (EtOAc:hexanes, 1:4); FT-IR (ATR):  $\nu$  1723 (C=O)  $\text{cm}^{-1}$ ; HR-MS (ESI):  $m/z$   $[\text{M}+\text{H}]^+$  calculated for  $\text{C}_{13}\text{H}_{16}\text{N}_4\text{O}_2^{79}\text{Br}^+$ : 339.0451, found: 339.0449.

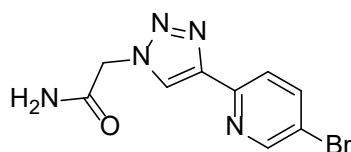

**44**

2-[4-(5-Bromopyridin-2-yl)-1*H*-1,2,3-triazol-1-yl]acetamide (**44**)

The title compound **44** was synthesised as a white solid (36 mg, 45%) according to general procedure A. <sup>1</sup>H NMR (600 MHz, DMSO-*d*<sub>6</sub>): δ 8.74 (dd, *J* = 2.4, 0.4 Hz, 1H), 8.55 (s, 1H), 8.15 (dd, *J* = 8.5, 2.4 Hz, 1H), 7.99 (dd, *J* = 8.5, 0.4 Hz, 1H), 7.77 (br s, 1H), 7.43 (br s, 1H), 5.15 (s, 2H); <sup>13</sup>C NMR (150.9 MHz, DMSO-*d*<sub>6</sub>): δ 167.1, 150.3, 148.8, 145.9, 139.9, 125.2, 121.1, 118.8, 51.6; *R*<sub>f</sub> = 0.25 (EtOAc); FT-IR (ATR): ν 3346 (N-H), 1679 (C=O) cm<sup>-1</sup>; HR-MS (ESI): *m/z* [M+H]<sup>+</sup> calculated for C<sub>9</sub>H<sub>9</sub>N<sub>5</sub>O<sup>79</sup>Br<sup>+</sup>: 281.9985, found: 281.9982.

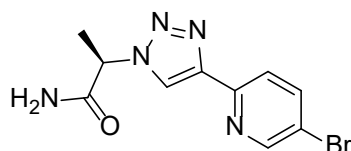

**45**

(2*S*)-2-[4-(5-Bromopyridin-2-yl)-1*H*-1,2,3-triazol-1-yl]propanamide (**45**)

The title compound **45** was synthesised as a white solid (75 mg, 88%) according to general procedure A. <sup>1</sup>H NMR (600 MHz, DMSO-*d*<sub>6</sub>): δ 8.73 (dd, *J* = 2.4, 0.5 Hz, 1H), 8.67 (s, 1H), 8.15 (dd, *J* = 8.5, 2.4 Hz, 1H), 7.99 (dd, *J* = 8.5, 0.5 Hz, 1H), 7.79 (br s, 1H), 7.43 (br s, 1H), 5.41 (q, *J* = 7.3 Hz, 1H), 1.75 (d, *J* = 7.3 Hz, 3H); <sup>13</sup>C NMR (150.9 MHz, DMSO-*d*<sub>6</sub>): δ 170.2, 150.3, 148.8, 145.9, 139.9, 123.0, 121.1, 118.8, 58.4, 17.8; *R*<sub>f</sub> = 0.12 (MeOH:CHCl<sub>3</sub>, 3:97); FT-IR (ATR): ν 3362 (N-H), 1680 (C=O) cm<sup>-1</sup>; HR-MS (ESI): *m/z* [M+H]<sup>+</sup> calculated for C<sub>10</sub>H<sub>11</sub>N<sub>5</sub>O<sup>79</sup>Br<sup>+</sup>: 296.0141, found: 296.0137.

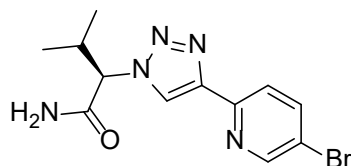

**46**

(2*S*)-2-[4-(5-Bromopyridin-2-yl)-1*H*-1,2,3-triazol-1-yl]-3-methylbutanamide (**46**)

The title compound **46** was synthesised as a white solid (82 mg, 81%) according to general procedure A. <sup>1</sup>H NMR (600 MHz, DMSO-*d*<sub>6</sub>): δ 8.73 (d, *J* = 1.2 Hz, 1H), 8.63 (s, 1H), 8.15 (dd, *J* = 8.3, 1.2 Hz, 1H), 8.02 (br s, 1H), 8.00 (d, *J* = 8.3 Hz, 1H), 7.55 (br s, 1H), 5.01 (d, *J* = 9.9 Hz, 1H), 2.48–2.47 (m, 1H), 1.01 (d, *J* = 6.5 Hz, 3H), 0.72 (d, *J* = 6.5 Hz, 3H); <sup>13</sup>C NMR

(150.9 MHz, DMSO-*d*<sub>6</sub>):  $\delta$  169.0, 150.3, 148.6, 146.2, 139.9, 122.3, 121.2, 118.9, 69.0, 30.8, 18.9, 18.5;  $R_f = 0.22$  (EtOAc/hexanes, 3:5); FT-IR (ATR):  $\nu$  3381 (N-H), 3158, 1675 (C=O)  $\text{cm}^{-1}$ ; HR-MS (ESI):  $m/z$   $[\text{M}+\text{H}]^+$  calculated for  $\text{C}_{12}\text{H}_{15}\text{N}_5\text{O}^{79}\text{Br}^+$ : 324.0454, found: 324.0452.

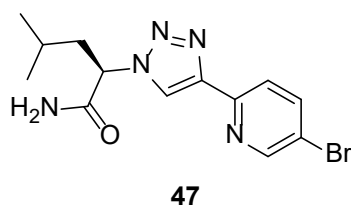

(2*S*)-2-[4-(5-Bromopyridin-2-yl)-1*H*-1,2,3-triazol-1-yl]-4-methylpentanamide (**47**)

The title compound **47** was synthesised as a white solid (100 mg, 99%) according to general procedure A. <sup>1</sup>H NMR (600 MHz, DMSO-*d*<sub>6</sub>):  $\delta$  8.73 (d,  $J = 1.3$  Hz, 1H), 8.69 (s, 1H), 8.14 (dd,  $J = 8.4, 1.3$  Hz, 1H), 7.99 (d,  $J = 8.4$  Hz, 1H), 7.92 (br s, 1H), 7.46 (br s, 1H), 5.42 (dd,  $J = 10.4, 5.1$  Hz, 1H), 2.18–2.13 (m, 1H), 1.91–1.87 (m, 1H), 1.27–1.21 (m, 1H), 0.90 (d,  $J = 6.5$  Hz, 3H), 0.86 (d,  $J = 6.5$  Hz, 3H); <sup>13</sup>C NMR (150.9 MHz, DMSO-*d*<sub>6</sub>):  $\delta$  169.8, 150.3, 148.7, 146.1, 139.9, 122.9, 121.1, 118.8, 61.4, 24.5, 22.5, 21.2;  $R_f = 0.21$  (EtOAc/hexanes, 1:1); FT-IR (ATR):  $\nu$  3400 (N-H), 3180, 1679 (C=O)  $\text{cm}^{-1}$ ; HR-MS (ESI):  $m/z$   $[\text{M}+\text{H}]^+$  calculated for  $\text{C}_{13}\text{H}_{17}\text{N}_5\text{O}^{79}\text{Br}^+$ : 338.0611, found: 338.0609.

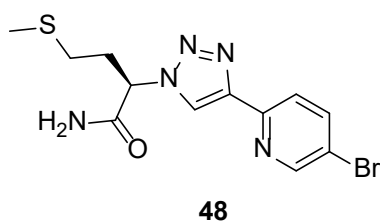

(2*S*)-2-[4-(5-Bromopyridin-2-yl)-1*H*-1,2,3-triazol-1-yl]-4-(methylsulfanyl)butanamide (**48**)

The title compound **48** was synthesised as a white solid (100 mg, 99%) according to general procedure A. <sup>1</sup>H NMR (500 MHz, DMSO-*d*<sub>6</sub>):  $\delta$  8.73 (s, 1H), 8.72 (s, 1H), 8.15 (d,  $J = 8.2$  Hz, 1H), 8.00 (d,  $J = 8.2$  Hz, 1H), 7.90 (br s, 1H), 7.50 (br s, 1H), 5.46 (dd,  $J = 8.7, 3.9$  Hz, 1H), 2.47–2.28 (m, 4H), 2.05 (s, 3H); <sup>13</sup>C NMR (125.8 MHz, DMSO-*d*<sub>6</sub>):  $\delta$  169.1, 150.3, 150.3, 148.7, 146.1, 139.9, 123.3, 123.2, 121.2, 118.9, 62.0, 31.1, 29.4, 14.6;  $R_f = 0.17$  (EtOAc/hexanes, 3:2); FT-IR (ATR):  $\nu$  3402 (N-H), 3177, 1682 (C=O)  $\text{cm}^{-1}$ ; HR-MS (ESI):  $m/z$   $[\text{M}+\text{H}]^+$  calculated for  $\text{C}_{12}\text{H}_{15}\text{N}_5\text{O}^{79}\text{BrS}^+$ : 356.0175, found: 356.0174.

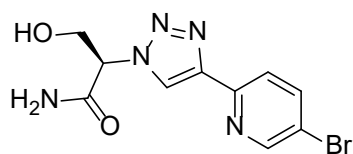

**49**

(2*S*)-2-[4-(5-Bromopyridin-2-yl)-1*H*-1,2,3-triazol-1-yl]-3-hydroxypropanamide (**49**)

The title compound **49** was synthesised as a white solid (40 mg, 56%) according to general procedure A. <sup>1</sup>H NMR (600 MHz, DMSO-*d*<sub>6</sub>): δ 8.73 (d, *J* = 2.2 Hz, 1H), 8.62 (s, 1H), 8.14 (dd, *J* = 8.5, 2.2 Hz, 1H), 8.00 (d, *J* = 8.5 Hz, 1H), 7.88 (br s, 1H), 7.50 (br s, 1H), 5.42 (m, 2H), 4.12–4.09 (m, 1H), 4.01–3.99 (m, 1H); <sup>13</sup>C NMR (150.9 MHz, DMSO-*d*<sub>6</sub>): δ 167.9, 150.4, 148.9, 145.9, 140.0, 123.6, 121.2, 118.9, 65.3, 61.4 ; R<sub>f</sub> = 0.26 (MeOH:CHCl<sub>3</sub>, 1:9); FT-IR (ATR): ν 3350 (N-H), 3151, 2921, 1682 (C=O) cm<sup>-1</sup>; HR-MS (ESI): *m/z* [M+H]<sup>+</sup> calculated for C<sub>10</sub>H<sub>11</sub>N<sub>5</sub>O<sub>2</sub><sup>79</sup>Br<sup>+</sup>: 312.0091, found: 312.0088.

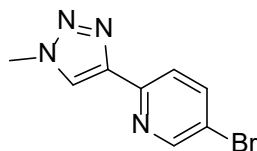

**50**

5-Bromo-2-(1-methyl-1*H*-1,2,3-triazol-4-yl)pyridine (**50**)

The title compound **50** was synthesised according to Fedorovich<sup>8</sup> affording **50** as a white solid (32 mg, quantitative). <sup>1</sup>H NMR (400 MHz, CDCl<sub>3</sub>): δ 8.61 (d, *J* = 2.2 Hz, 1H), 8.11 (s, 1H), 8.07 (d, *J* = 8.4 Hz, 1H), 7.89 (dd, *J* = 8.4, 2.2 Hz, 1H), 4.16 (s, 3H); <sup>13</sup>C NMR (100.6 MHz, CDCl<sub>3</sub>): δ 150.3, 148.7, 147.6, 139.9, 123.5, 121.6, 119.6, 37.0; R<sub>f</sub> = 0.29 (EtOAc:hexanes, 1:1); FT-IR (ATR): ν 2923, 1596 cm<sup>-1</sup>; HR-MS (ESI): *m/z* [M+H]<sup>+</sup> calculated for C<sub>8</sub>H<sub>8</sub>N<sub>4</sub><sup>79</sup>Br<sup>+</sup>: 238.9927, found: 238.9925.

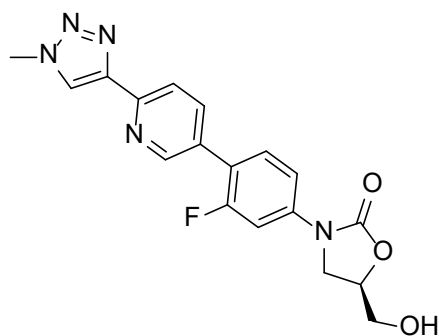

**3**

(5*R*)-3-{3-Fluoro-4-[6-(1-methyl-1*H*-1,2,3-triazol-4-yl)pyridin-3-yl]phenyl}-5-(hydroxymethyl)-1,3-oxazolidin-2-one (**3**)

The title compound **3** was synthesised as a white solid (29 mg, 54%) according to general procedure B. <sup>1</sup>H NMR (600 MHz, DMSO-*d*<sub>6</sub>): δ 8.79 (br s, 1H), 8.61 (s, 1H), 8.12 (d, *J* = 8.2 Hz, 1H), 8.08 (ddd, *J* = 8.3, 2.2, 1.2 Hz, 1H), 7.70 (dd, *J* = 9.0, 9.0 Hz, 1H), 7.69 (dd, *J* = 14.4, 2.0 Hz, 1H), 7.50 (dd, *J* = 9.0, 2.0 Hz, 1H), 5.26 (br s, 1H), 4.78–4.74 (m, 1H), 4.15 (dd, *J* = 9.0, 9.0 Hz, 1H), 4.14 (s, 3H), 3.90 (dd, *J* = 9.0, 6.2 Hz, 1H), 3.71 (dd, *J* = 12.2, 2.9 Hz, 1H), 3.59 (dd, *J* = 12.2, 2.9 Hz, 1H); <sup>13</sup>C NMR (150.6 MHz, DMSO-*d*<sub>6</sub>): δ 159.3 (d, *J* = 245 Hz), 154.4, 149.0 (d, *J* = 5.3 ppm), 149.0, 146.9, 140.2 (d, *J* = 11.1 Hz), 136.9 (d, *J* = 3.0 Hz), 130.8 (d, *J* = 4.4 Hz), 129.4, 124.3, 119.1 (d, *J* = 13.3 Hz), 119.1, 114.0 (d, *J* = 2.4 Hz), 105.4 (d, *J* = 28.5 Hz), 73.4, 61.6, 46.0, 36.5; *R*<sub>f</sub> = 0.09 (MeOH:CHCl<sub>3</sub>, 3:97); FT-IR (ATR): ν 3361 (O-H), 1732 (C=O) cm<sup>-1</sup>; HR-MS (ESI): *m/z* [M+H]<sup>+</sup> calculated for C<sub>18</sub>H<sub>17</sub>FN<sub>5</sub>O<sub>3</sub><sup>+</sup>: 370.1310, found: 370.1307.

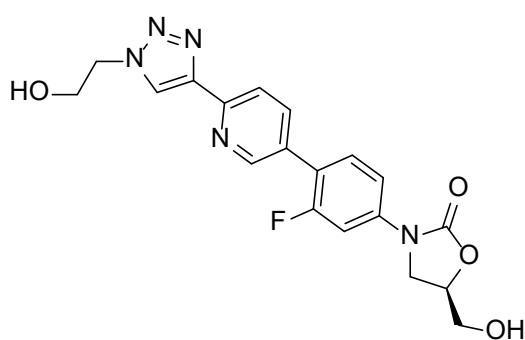

**4**

(5*R*)-3-(3-Fluoro-4-{6-[1-(2-hydroxyethyl)-1*H*-1,2,3-triazol-4-yl]pyridin-3-yl}phenyl)-5-(hydroxymethyl)-1,3-oxazolidin-2-one (**4**)

The title compound **4** was synthesised as a white solid (46 mg, 45%) according to general procedure B. <sup>1</sup>H NMR (600 MHz, DMSO-*d*<sub>6</sub>): δ 8.79 (br s, 1H), 8.60 (s, 1H), 8.13 (d, *J* = 8.2 Hz, 1H), 8.09 (dd, 8.8, 1.7 Hz, 1H), 7.71 (dd, *J* = 8.8, 8.8 Hz, 1H), 7.69 (dd, *J* = 8.8, 2.2 Hz,

1H), 7.51 (dd,  $J = 8.8, 2.2$  Hz, 1H), 5.26 (br s, 1H), 5.10 (br s, 1H), 4.78–4.74 (m, 1H), 4.50 (t,  $J = 5.5$  Hz, 2H), 4.15 (dd,  $J = 8.9, 8.9$  Hz, 1H), 3.90 (dd,  $J = 8.9, 6.2$  Hz, 1H), 3.85 (m, 2H), 3.71 (d,  $J = 12.4$  Hz, 1H), 3.59 (d,  $J = 12.4$  Hz, 1H);  $^{13}\text{C}$  NMR (150.9 MHz, DMSO- $d_6$ ):  $\delta$  159.7 (d,  $J = 245$  Hz), 154.4, 149.0 (d,  $J = 3.6$  Hz), 148.9, 146.7, 140.1 (d,  $J = 11.5$  Hz), 136.9 (d,  $J = 2.9$  Hz), 130.8 (d,  $J = 4.6$  Hz), 129.4, 123.8, 119.1 (d,  $J = 13.2$  Hz), 119.1, 114.0 (d,  $J = 3.2$  Hz), 105.4 (d,  $J = 28.4$  Hz), 73.5, 61.6, 59.8, 52.4, 46.0;  $R_f = 0.23$  (MeOH:CHCl<sub>3</sub>, 1:19); FT-IR (ATR):  $\nu$  3376 (O-H), 1746 (C=O) cm<sup>-1</sup>; HR-MS (ESI):  $m/z$  [M+H]<sup>+</sup> calculated for C<sub>19</sub>H<sub>19</sub>FN<sub>5</sub>O<sub>4</sub><sup>+</sup>: 400.1416, found: 400.1414.

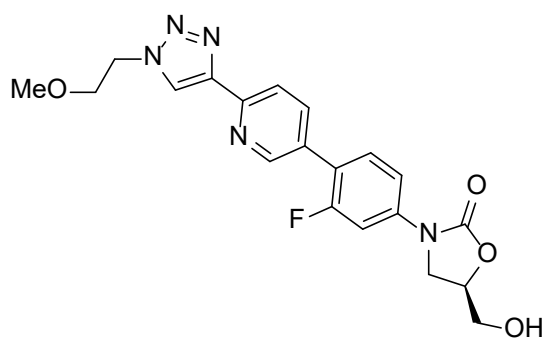

**5**

(5*R*)-3-(3-Fluoro-4-{6-[1-(2-methoxyethyl)-1*H*-1,2,3-triazol-4-yl]pyridin-3-yl}phenyl)-5-(hydroxymethyl)-1,3-oxazolidin-2-one (**5**)

The title compound **5** was synthesised as a white solid (52 mg, 72%) according to general procedure B.  $^1\text{H}$  NMR (400 MHz, DMSO- $d_6$ ):  $\delta$  8.79 (br s, 1H), 8.61 (s, 1H), 8.13 (dd,  $J = 8.2, 0.8$  Hz, 1H), 8.08 (ddd,  $J = 8.4, 2.0, 1.4$  Hz, 1H), 7.71 (dd,  $J = 8.9, 8.9$  Hz, 1H), 7.69 (dd,  $J = 13.4, 2.0$  Hz), 7.51 (dd,  $J = 8.9, 2.0$  Hz, 1H), 5.26 (br s, 1H), 4.79–4.73 (m, 1H), 4.63 (t,  $J = 5.1$  Hz, 2H), 4.15 (dd,  $J = 9.1, 9.1$  Hz, 1H), 3.90 (dd,  $J = 9.1, 6.2$  Hz, 1H), 3.81 (t,  $J = 5.1$  Hz, 2H), 3.71 (d,  $J = 12.3$  Hz, 1H), 3.59 (d,  $J = 12.3$  Hz, 1H), 3.27 (s, 3H);  $^{13}\text{C}$  NMR (100.6 MHz, DMSO- $d_6$ ):  $\delta$  159.5 (d,  $J = 245$  Hz), 154.4, 149.0, 149.0 (d,  $J = 3.2$  Hz), 146.8, 140.2 (d,  $J = 11.3$  Hz), 136.9 (d,  $J = 3.2$  Hz), 130.8 (d,  $J = 4.6$  Hz), 129.4 (d,  $J = 2.0$  Hz), 123.8, 119.2, 119.1 (d,  $J = 13.5$  Hz), 114.0 (d,  $J = 3.0$  Hz), 105.4 (d,  $J = 28.5$  Hz), 73.5, 70.1, 61.6, 58.0, 49.5, 46.0;  $R_f = 0.12$  (MeOH:CHCl<sub>3</sub>, 3:97); FT-IR (ATR):  $\nu$  3364 (O-H), 1740 (C=O) cm<sup>-1</sup>; HR-MS (ESI):  $m/z$  [M+H]<sup>+</sup> calculated for C<sub>20</sub>H<sub>21</sub>FN<sub>5</sub>O<sub>4</sub><sup>+</sup>: 414.1572, found: 414.1572.

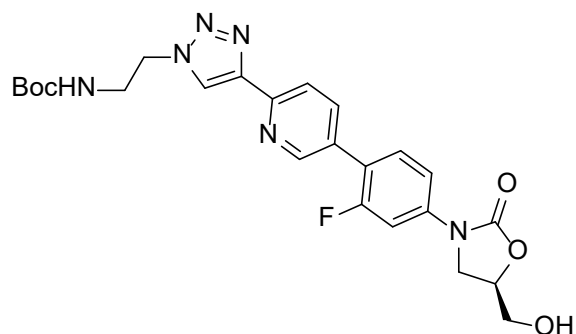

*tert*-Butyl N-{2-[4-(5-{2-fluoro-4-[(5*R*)-5-(hydroxymethyl)-2-oxo-1,3-oxazolidin-3-yl]phenyl}pyridin-2-yl)-1*H*-1,2,3-triazol-1-yl]ethyl}carbamate

The title compound was synthesised as an off-white solid (28 mg, 52%) according to general procedure B. <sup>1</sup>H NMR (500 MHz, DMSO-*d*<sub>6</sub>): δ 8.80 (br s, 1H), 8.59 (s, 1H), 8.12 (d, *J* = 8.2 Hz, 1H), 8.08 (d, *J* = 8.2 Hz, 1H), 7.71 (dd, *J* = 9.0, 9.0 Hz, 1H), 7.69 (dd, *J* = 14.0, 2.0 Hz, 1H), 7.51 (dd, *J* = 9.0, 1.9 Hz, 1H), 7.04 (t, *J* = 5.6 Hz, 1H), 5.26 (br s, 1H), 4.78–4.74 (m, 1H), 4.49 (t, *J* = 5.7 Hz, 2H), 4.15 (dd, *J* = 8.9, 8.9 Hz, 1H), 3.90 (dd, *J* = 8.9, 6.2 Hz, 1H), 3.71 (d, *J* = 12.2 Hz, 1H), 3.59 (d, *J* = 12.2 Hz, 1H), 3.44 (dt, *J* = 5.7, 5.6 Hz, 2H), 1.33 (s, 9H); <sup>13</sup>C NMR (125.8 MHz, DMSO-*d*<sub>6</sub>): δ 159.3 (d, *J* = 245 Hz), 155.6, 154.4, 149.0 (d, *J* = 4.0 Hz), 148.9, 146.8, 140.2 (d, *J* = 11.2 Hz), 136.9 (d, *J* = 3.0 Hz), 130.8 (d, *J* = 4.6 Hz), 129.4, 123.7, 119.1 (d, *J* = 13.2 Hz), 119.1, 114.0 (d, *J* = 2.9 Hz), 105.4 (d, *J* = 28.5 Hz), 78.0, 73.5, 61.6, 49.4, 46.0, 40.2, 28.2; *R*<sub>f</sub> = 0.29 (MeOH:CHCl<sub>3</sub>, 1:19); FT-IR (ATR): ν 3438 (N-H), 3370 (O-H), 1709 (C=O), 1689 (C=O) cm<sup>-1</sup>; HR-MS (ESI): *m/z* [M+H]<sup>+</sup> calculated for C<sub>24</sub>H<sub>28</sub>FN<sub>6</sub>O<sub>5</sub><sup>+</sup>: 499.2100, found: 499.2096.

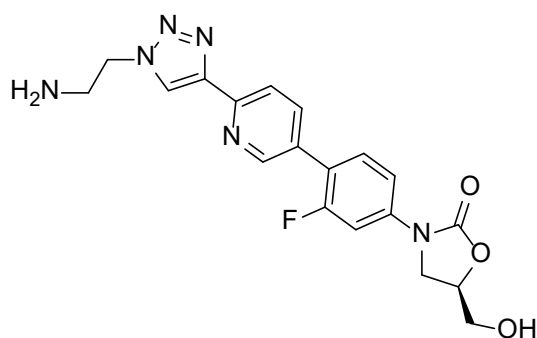

**6**

(5*R*)-3-(4-{6-[1-(2-Aminoethyl)-1*H*-1,2,3-triazol-4-yl]pyridin-3-yl}-3-fluorophenyl)-5-(hydroxymethyl)-1,3-oxazolidin-2-one (**6**)

The above protected amine was dissolved in CH<sub>2</sub>Cl<sub>2</sub> (3.0 mL) and to this, TFA (0.5 mL) was added dropwise. The resulting solution was stirred at rt (18 h). After being cooled to 0 °C, the solution was neutralised with saturated NaHCO<sub>3</sub> solution, extracted with CH<sub>2</sub>Cl<sub>2</sub>/MeOH (1:1,

3 × 30 mL). The organic extracts were combined, dried over anhydrous MgSO<sub>4</sub>, filtered, concentrated under reduced pressure and purified by FCC to afford the title compound **6** as a white solid (26 mg) quantitatively. <sup>1</sup>H NMR (600 MHz, DMSO-*d*<sub>6</sub>): δ 8.78 (br s, 1H), 8.64 (s, 1H), 8.13 (d, *J* = 8.1 Hz, 1H), 8.08 (d, *J* = 8.1 Hz, 1H), 7.72–7.67 (m, 2H), 7.50 (d, *J* = 8.1 Hz, 1H), 5.30 (br s, 1H), 4.77–4.74 (m, 1H), 4.44–4.40 (m, 2H), 4.15 (dd, *J* = 8.1, 8.1 Hz, 1H), 3.90 (dd, *J* = 8.1, 6.1 Hz, 1H), 3.70 (d, *J* = 11.6 Hz, 1H), 3.60 (d, *J* = 11.6 Hz, 1H), 3.05 (s, 2H); <sup>13</sup>C NMR (150.9 MHz, DMSO-*d*<sub>6</sub>, TFA salt): δ 159.2 (d, *J* = 245.0 Hz), 154.5, 149.1 (d, *J* = 3.9 Hz), 149.0, 146.8, 140.2 (d, *J* = 10.4 Hz), 137.0 (d, *J* = 3.0 Hz), 130.9 (d, *J* = 4.7 Hz), 129.5, 123.9, 119.3, 119.2 (d, *J* = 12.2 Hz), 114.1 (d, *J* = 3.0 Hz), 105.5 (d, *J* = 28.3 Hz), 73.6, 61.7, 46.1, 41.7; R<sub>f</sub> = 0.17 (MeOH:CHCl<sub>3</sub>, 2:8); FT-IR (ATR): ν 3361 (O-H/N-H), 1742 (C=O) cm<sup>-1</sup>; HR-MS (ESI): *m/z* [M+H]<sup>+</sup> calculated for C<sub>19</sub>H<sub>20</sub>FN<sub>6</sub>O<sub>3</sub><sup>+</sup>: 399.1575, found: 399.1574.

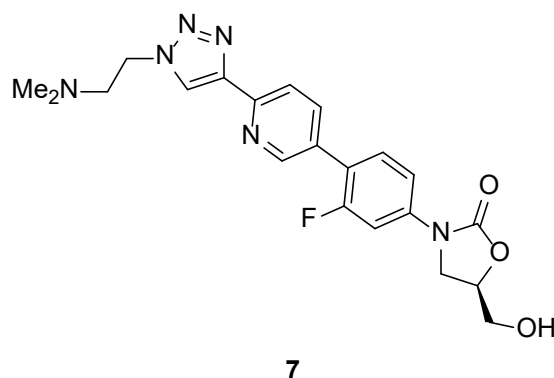

(5*R*)-3-[4-(6-{1-[2-(Dimethylamino)ethyl]-1*H*-1,2,3-triazol-4-yl}pyridin-3-yl)-3-fluorophenyl]-5-(hydroxymethyl)-1,3-oxazolidin-2-one (**7**)

The title compound **7** was synthesised as a white solid (53 mg, 73%) according to general procedure B. <sup>1</sup>H NMR (500 MHz, DMSO-*d*<sub>6</sub>): δ 8.79 (br s, 1H), 8.64 (s, 1H), 8.13 (dd, *J* = 8.2, 0.7 Hz, 1H), 8.08 (ddd, *J* = 8.2, 2.0, 1.4 Hz, 1H), 7.71 (dd, *J* = 8.7, 8.7 Hz, 1H), 7.69 (dd, *J* = 13.8, 2.0, 1H), 7.51 (dd, *J* = 8.7, 2.0 Hz, 1H), 5.25 (t, *J* = 5.6 Hz, 1H), 4.78–4.74 (m, 1H), 4.54 (t, *J* = 6.2 Hz, 2H), 4.15 (dd, *J* = 9.1, 9.1 Hz, 1H), 3.90 (dd, *J* = 9.1, 6.2 Hz, 1H), 3.71 (ddd, *J* = 12.5, 5.6, 3.4 Hz, 1H), 3.59 (ddd, *J* = 12.5, 5.6, 4.1 Hz, 1H), 2.75 (t, *J* = 6.2 Hz, 2H), 2.20 (s, 6H); <sup>13</sup>C NMR (125.8 MHz, DMSO-*d*<sub>6</sub>): δ 159.3 (d, *J* = 245.3 Hz), 154.3, 149.0 (d, *J* = 3.9 Hz), 148.9, 146.6, 140.1 (d, *J* = 11.3 Hz), 136.9 (d, *J* = 3.2 Hz), 130.8 (d, *J* = 4.5 Hz), 129.4 (d, *J* = 1.9 Hz), 123.7, 119.2, 119.1, 114.0 (d, *J* = 2.8 Hz), 105.4 (d, *J* = 28.6 Hz), 73.4, 61.6, 58.2, 47.5, 46.0, 44.9; R<sub>f</sub> = 0.32 (MeOH:CHCl<sub>3</sub>:NH<sub>3</sub>, 1:9:0.05); FT-IR (ATR): ν 3353 (O-H), 1738 (C=O) cm<sup>-1</sup>; HR-MS (ESI): *m/z* [M+H]<sup>+</sup> calculated for C<sub>19</sub>H<sub>20</sub>FN<sub>6</sub>O<sub>3</sub><sup>+</sup>: 427.1888, found: 427.1887.

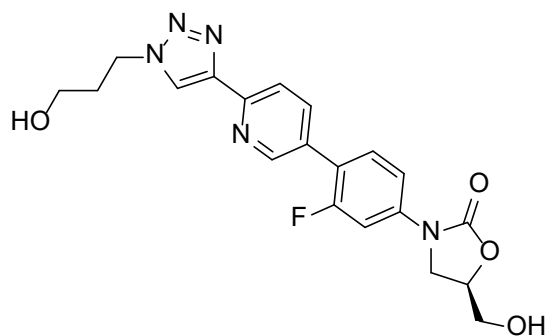

8

(5*R*)-3-(3-Fluoro-4-{6-[1-(3-hydroxypropyl)-1*H*-1,2,3-triazol-4-yl]pyridin-3-yl}phenyl)-5-(hydroxymethyl)-1,3-oxazolidin-2-one (**8**)

The title compound **8** was synthesised as a white solid (19 mg, 52%) according to general procedure B. <sup>1</sup>H NMR (400 MHz, DMSO-*d*<sub>6</sub>): δ 8.79 (br s, 1H), 8.66 (s, 1H), 8.13 (dd, *J* = 8.2, 0.8 Hz, 1H), 8.08 (ddd, *J* = 8.2, 2.2, 1.3 Hz, 1H), 7.70 (dd, *J* = 8.7, 8.7 Hz, 1H), 7.69 (dd, *J* = 13.6, 2.2 Hz, 1H), 7.50 (dd, *J* = 8.7, 2.2 Hz, 1H), 5.26 (br s, 1H), 4.79–4.73 (m, 1H), 4.71 (t, *J* = 4.4 Hz, 1H), 4.51 (t, *J* = 7.0 Hz, 2H), 4.15 (dd, *J* = 9.1, 9.1 Hz, 1H), 3.90 (dd, *J* = 9.1, 6.2 Hz, 1H), 3.71 (d, *J* = 12.2 Hz, 1H), 3.59 (d, *J* = 12.2 Hz, 1H), 3.44 (td, *J* = 6.4, 4.4 Hz, 2H), 2.04 (tt, *J* = 7.0, 6.4 Hz, 2H); <sup>13</sup>C NMR (100.6 MHz, DMSO-*d*<sub>6</sub>): δ 159.4 (d, *J* = 245 Hz), 154.4, 149.0 (d, *J* = 8.2 Hz), 148.9, 146.8, 140.2 (d, *J* = 11.3 Hz), 136.9 (d, *J* = 3.3 Hz), 130.8 (d, *J* = 4.6 Hz), 129.4 (d, *J* = 1.9 Hz), 123.5, 119.2, 119.2 (d, *J* = 13.5 Hz), 114.0 (d, *J* = 3.0 Hz), 105.4 (d, *J* = 28.5 Hz), 73.5, 61.6, 57.5, 47.0, 46.0, 32.8; *R*<sub>f</sub> = 0.29 (MeOH:CHCl<sub>3</sub>, 1:9); FT-IR (ATR): ν 3263 (O-H), 1739 (C=O) cm<sup>-1</sup>; HR-MS (ESI): *m/z* [M+H]<sup>+</sup> calculated for C<sub>20</sub>H<sub>21</sub>FN<sub>5</sub>O<sub>4</sub><sup>+</sup>: 414.1572, found: 414.1570.

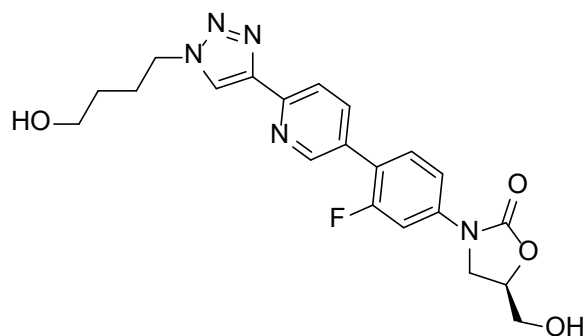

9

(5*R*)-3-(3-Fluoro-4-{6-[1-(4-hydroxybutyl)-1*H*-1,2,3-triazol-4-yl]pyridin-3-yl}phenyl)-5-(hydroxymethyl)-1,3-oxazolidin-2-one (**9**)

The title compound **9** was synthesised as a light brown solid (53 mg, 76%) according to general procedure B. <sup>1</sup>H NMR (600 MHz, DMSO-*d*<sub>6</sub>): δ 8.79 (br s, 1H), 8.67 (s, 1H), 8.13 (d, *J* = 8.2 Hz, 1H), 8.08 (ap dt, *J* = 8.7, 1.4 Hz, 1H), 7.70 (dd, *J* = 9.2, 9.2 Hz, 1H), 7.69 (dd, *J* = 13.6, 2.2 Hz, 1H), 7.51 (dd, *J* = 9.2, 2.1 Hz, 1H), 5.25 (t, *J* = 5.6 Hz, 1H), 4.78–4.74 (m, 1H), 4.49–4.45 (m, 3H), 4.15 (dd, *J* = 8.9, 8.9 Hz, 1H), 3.90 (dd, *J* = 8.9, 6.2 Hz, 1H), 3.71 (ddd, *J* = 12.5, 5.6, 3.4 Hz, 1H), 3.59 (ddd, *J* = 12.5, 5.6, 4.1 Hz, 1H), 3.43 (td, *J* = 6.2, 6.2 Hz, 2H), 1.92 (tt, *J* = 7.2, 7.2 Hz, 2H), 1.42 (tt, *J* = 6.2, 6.2 Hz, 2H); <sup>13</sup>C NMR (150.9 MHz, DMSO-*d*<sub>6</sub>): δ 159.3 (d, *J* = 245 Hz), 154.4, 149.0 (d, *J* = 4.0 Hz), 148.9, 146.8, 140.2 (d, *J* = 11.1 Hz), 136.9 (d, *J* = 3.0 Hz), 130.8 (d, *J* = 4.4 Hz), 129.4, 123.4, 119.2, 119.1 (*J* = 13.1 Hz), 114.0 (d, *J* = 2.9 Hz), 105.4 (d, *J* = 28.5 Hz), 73.5, 61.6, 60.0, 49.6, 46.0, 29.3, 26.5; *R*<sub>f</sub> = 0.30 (MeOH:CHCl<sub>3</sub>, 1:9); FT-IR (ATR): ν 3306 (O-H), 3191, 1743 (C=O) cm<sup>-1</sup>; HR-MS (ESI): *m/z* [M+H]<sup>+</sup> calculated for C<sub>21</sub>H<sub>23</sub>FN<sub>5</sub>O<sub>4</sub><sup>+</sup>: 428.1729, found: 428.1725.

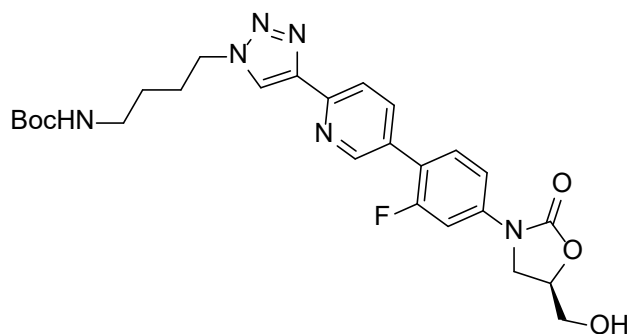

*tert*-Butyl N-{4-[4-(5-{2-fluoro-4-[(5*R*)-5-(hydroxymethyl)-2-oxo-1,3-oxazolidin-3-yl]phenyl}pyridin-2-yl)-1*H*-1,2,3-triazol-1-yl]butyl}carbamate

The title compound was synthesised as a white solid (57 mg, 85%) according to general procedure B. <sup>1</sup>H NMR (500 MHz, DMSO-*d*<sub>6</sub>): δ 8.78 (br s, 1H), 8.67 (s, 1H), 8.13 (d, *J* = 8.2

Hz, 1H), 8.08 (ddd,  $J = 8.2, 2.1, 1.3$  Hz, 1H), 7.70 (dd,  $J = 8.7, 8.7$  Hz, 1H), 7.69 (dd,  $J = 13.9, 2.1$  Hz, 1H), 7.51 (dd,  $J = 8.7, 2.1$  Hz, 1H), 6.84 (t,  $J = 5.4$  Hz, 1H), 5.26 (t,  $J = 5.6$  Hz, 1H), 4.78–4.74 (m, 1H), 4.45 (t,  $J = 7.0$  Hz, 2H), 4.15 (dd,  $J = 9.0, 9.0$  Hz, 1H), 3.90 (dd,  $J = 9.0, 6.2$  Hz, 1H), 3.71 (ddd,  $J = 12.5, 5.6, 3.4$  Hz, 1H), 3.59 (ddd,  $J = 12.5, 5.6, 4.0$  Hz, 1H), 2.95 (td,  $J = 6.5, 6.5$  Hz, 2H), 1.87 (tt,  $J = 7.0, 7.0$  Hz, 2H), 1.40–1.34 (m, 2H), 1.36 (s, 9H);  $^{13}\text{C}$  NMR (125.8 MHz, DMSO- $d_6$ ):  $\delta$  159.3 (d,  $J = 245$  Hz), 155.7, 154.4, 149.0 (d,  $J = 3.8$  Hz), 149.0, 146.8, 140.2 (d,  $J = 11.4$  Hz), 136.9 (d,  $J = 2.7$  Hz), 130.8 (d,  $J = 4.4$  Hz), 129.4, 123.4, 119.2, 119.1 (d,  $J = 13.1$  Hz), 114.0 (d,  $J = 2.8$  Hz), 105.4 (d,  $J = 28.6$  Hz), 77.5, 73.5, 61.6, 49.3, 46.0, 39.4, 28.3, 27.1, 26.5;  $R_f = 0.40$  (MeOH:CHCl<sub>3</sub>, 1:19); FT-IR (ATR):  $\nu$  3442 (N-H), 3362 (O-H), 1709 (C=O), 1686 (C=O)  $\text{cm}^{-1}$ ; HR-MS (ESI):  $m/z$   $[\text{M}+\text{H}]^+$  calculated for C<sub>26</sub>H<sub>32</sub>FN<sub>6</sub>O<sub>5</sub><sup>+</sup>: 527.2413, found: 527.2410.

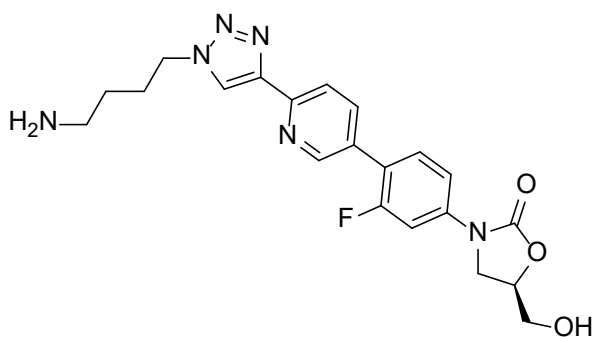

**10**

(5*R*)-3-(4-{6-[1-(4-Aminobutyl)-1*H*-1,2,3-triazol-4-yl]pyridin-3-yl}-3-fluorophenyl)-5-(hydroxymethyl)-1,3-oxazolidin-2-one (**10**)

The above protected amine was dissolved in CH<sub>2</sub>Cl<sub>2</sub> (3.0 mL) and to this, TFA (0.5 mL) was added dropwise. The resulting solution was stirred at rt (18 h). After being cooled to 0 °C, the solution was neutralised with saturated NaHCO<sub>3</sub> solution, extracted with CH<sub>2</sub>Cl<sub>2</sub>/MeOH (1:1, 3 × 30 mL). The organic extracts were combined, dried over anhydrous MgSO<sub>4</sub>, filtered, concentrated under reduced pressure and purified by FCC to afford the title compound **10** as a white solid (34 mg) quantitatively.  $^1\text{H}$  NMR (600 MHz, DMSO- $d_6$ ):  $\delta$  8.78 (br s, 1H), 8.67 (s, 1H), 8.13 (d,  $J = 8.2$  Hz, 1H), 8.08 (d,  $J = 8.2$  Hz, 1H), 7.70 (dd,  $J = 9.0, 9.0$  Hz, 1H), 7.69 (dd,  $J = 13.6, 2.0$  Hz, 1H), 7.50 (dd,  $J = 9.0, 2.0$  Hz, 1H), 5.27 (br s, 1H), 4.77–4.74 (m, 1H), 4.44 (t,  $J = 7.0$  Hz, 2H), 4.15 (dd,  $J = 9.0, 9.0$  Hz, 1H), 4.07 (br s, 2H), 3.89 (dd,  $J = 9.0, 6.2$  Hz, 1H), 3.71 (d,  $J = 12.2$  Hz, 1H), 3.58 (d,  $J = 12.2$  Hz, 1H), 2.60–2.52 (m, 2H), 1.91 (td,  $J = 7.0, 7.0$  Hz, 2H), 1.34 (td,  $J = 7.1, 7.1$  Hz, 2H);  $^{13}\text{C}$  NMR (150.9 MHz, DMSO- $d_6$ ):  $\delta$  159.4 (d,  $J = 245.5$  Hz), 154.4, 149.0 (d,  $J = 4.2$  Hz), 149.0, 146.8, 140.2, (d,  $J = 11.3$  Hz), 137.0 (d,  $J = 2.6$

Hz), 130.8 (d,  $J = 4.1$  Hz), 129.5, 123.4, 119.2, 119.2, 114.1 (d,  $J = 1.4$  Hz), 105.4 (d,  $J = 28.7$  Hz), 73.5, 61.6, 49.7, 46.0, 40.9, 29.9, 27.3;  $R_f = 0.08$  (MeOH:CHCl<sub>3</sub>:NH<sub>3</sub>, 2:10:0.1); FT-IR (ATR):  $\nu$  3365 (O-H/N-H), 1709 (C=O) cm<sup>-1</sup>; HR-MS (ESI):  $m/z$  [M+H]<sup>+</sup> calculated for C<sub>21</sub>H<sub>24</sub>FN<sub>6</sub>O<sub>3</sub><sup>+</sup>: 427.1888, found: 427.1882.

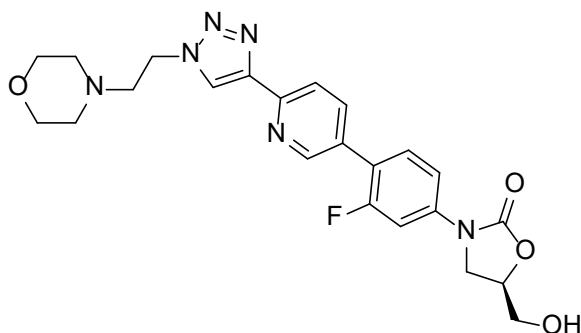

**11**

(5*R*)-3-[3-Fluoro-4-(6-{1-[2-(morpholin-4-yl)ethyl]-1*H*-1,2,3-triazol-4-yl}pyridin-3-yl)phenyl]-5-(hydroxymethyl)-1,3-oxazolidin-2-one (**11**)

The title compound **11** was synthesised as a white solid (55 mg, 66%) according to general procedure B. <sup>1</sup>H NMR (600 MHz, DMSO-*d*<sub>6</sub>):  $\delta$  8.79 (br s, 1H), 8.65 (s, 1H), 8.13 (dd,  $J = 8.1, 0.4$  Hz, 1H), 8.08 (ddd,  $J = 8.5, 2.2, 1.3$  Hz, 1H), 7.70 (dd,  $J = 8.9, 8.9$  Hz, 1H), 7.69 (dd,  $J = 13.5, 2.2$  Hz, 1H), 7.50 (dd,  $J = 8.9$  Hz, 2.2 Hz, 1H), 5.28 (br s, 1H), 4.78–4.74 (m, 1H), 4.58 (t,  $J = 6.3$  Hz, 2H), 4.15 (dd,  $J = 9.0, 9.0$  Hz, 1H), 3.89 (dd,  $J = 9.0, 6.3$  Hz, 1H), 3.71 (m, 1H), 3.58 (m, 1H), 3.54 (m, 4H), 2.82 (t,  $J = 6.2$  Hz, 2H), 2.45 (br s, 4H); <sup>13</sup>C NMR (150.9 MHz, DMSO-*d*<sub>6</sub>):  $\delta$  159.3 (d,  $J = 245$  Hz), 154.4, 149.1 (d,  $J = 4.0$  Hz), 149.0, 146.7, 140.2 (d,  $J = 11.1$  Hz), 137.0 (d,  $J = 2.9$  Hz), 130.8 (d,  $J = 4.4$  Hz), 129.5, 123.8, 119.2, 119.2, 114.1 (d,  $J = 2.2$  Hz), 105.5 (d,  $J = 28.5$  Hz), 73.5, 66.2, 61.7, 57.4, 53.0, 46.7, 46.0;  $R_f = 0.30$  (MeOH:CHCl<sub>3</sub>, 1:19); FT-IR (ATR):  $\nu$  3438 (O-H), 1734 (C=O) cm<sup>-1</sup>; HR-MS (ESI):  $m/z$  [M+H]<sup>+</sup> calculated for C<sub>23</sub>H<sub>26</sub>FN<sub>6</sub>O<sub>4</sub><sup>+</sup>: 469.1994, found: 469.1990.

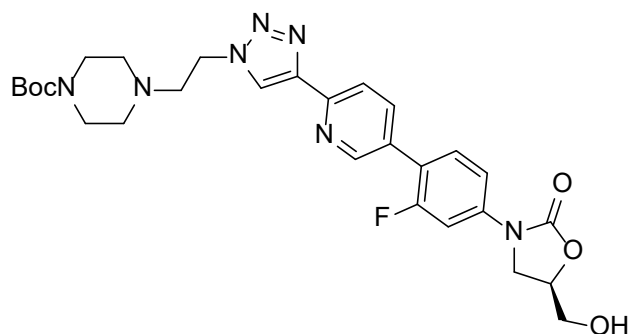

*tert*-Butyl 4-{2-[4-(5-{2-fluoro-4-[(5*R*)-5-(hydroxymethyl)-2-oxo-1,3-oxazolidin-3-yl]phenyl}pyridin-2-yl)-1*H*-1,2,3-triazol-1-yl]ethyl}piperazine-1-carboxylate

The title compound was synthesised as a white solid (45 mg, 65%) according to general procedure B. <sup>1</sup>H NMR (600 MHz, DMSO-*d*<sub>6</sub>): δ 8.79 (br s, 1H), 8.66 (s, 1H), 8.13 (dd, *J* = 8.2, 0.5 Hz, 1H), 8.08 (ddd, *J* = 9.0, 2.0, 1.2 Hz), 7.71 (dd, *J* = 9.0, 9.0 Hz, 1H), 7.69 (dd, *J* = 13.7, 2.0 Hz, 1H), 7.51 (dd, *J* = 9.0, 2.1 Hz, 1H), 5.26 (br s, 1H), 4.78–4.74 (m, 1H), 4.58 (t, *J* = 6.2 Hz, 2H), 4.15 (dd, *J* = 9.0, 9.0 Hz, 1H), 3.90 (dd, *J* = 9.0, 6.2 Hz, 1H), 3.70 (d, *J* = 12.2 Hz, 1H), 3.58 (d, *J* = 12.2 Hz, 1H), 3.27–3.26 (m, 4H), 2.85 (t, *J* = 6.2 Hz, 2H), 2.42–2.41 (m, 4H), 1.39 (s, 9H); <sup>13</sup>C NMR (150.9 MHz, DMSO-*d*<sub>6</sub>): δ 159.3 (d, *J* = 245.1 Hz), 154.3, 153.8, 149.0 (d, *J* = 4.1 Hz), 148.9, 146.6, 140.1 (d, *J* = 11.5 Hz), 136.9 (d, *J* = 3.6 Hz), 130.8 (d, *J* = 4.6 Hz), 129.4, 123.8, 119.1 (t, *J* = 6.3 Hz), 114.0 (d, *J* = 3.0 Hz), 105.4 (d, *J* = 28.6 Hz), 78.8, 73.4, 61.6, 56.8, 52.1, 46.9, 46.0, 42.8, 28.0; *R*<sub>f</sub> = 0.31 (MeOH:CHCl<sub>3</sub>, 1:19); FT-IR (ATR): ν 3474 (N-H), 3365 (O-H), 1717 (C=O), 1688 (C=O) cm<sup>-1</sup>; HR-MS (ESI): *m/z* [M+H]<sup>+</sup> calculated for C<sub>28</sub>H<sub>35</sub>FN<sub>7</sub>O<sub>5</sub><sup>+</sup>: 568.2678, found: 568.2675.

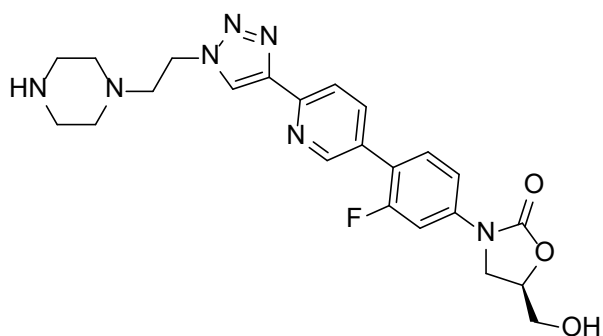

**12**

(5*R*)-3-[3-Fluoro-4-(6-{1-[2-(piperazin-1-yl)ethyl]-1*H*-1,2,3-triazol-4-yl}pyridin-3-yl)phenyl]-5-(hydroxymethyl)-1,3-oxazolidin-2-one (**12**)

The above protected amine was dissolved in CH<sub>2</sub>Cl<sub>2</sub> (3.0 mL) and to this, TFA (0.5 mL) was added dropwise. The resulting solution was stirred at rt (18 h). After being cooled to 0 °C, the solution was neutralised with saturated NaHCO<sub>3</sub> solution, extracted with CH<sub>2</sub>Cl<sub>2</sub>/MeOH (1:1, 3 × 30 mL). The organic extracts were combined, dried over anhydrous MgSO<sub>4</sub>, filtered, concentrated under reduced pressure and purified by FCC to afford the title compound **12** as a white solid (32 mg) quantitatively. <sup>1</sup>H NMR (600 MHz, DMSO-*d*<sub>6</sub>): δ 8.79 (br s, 1H), 8.64 (s, 1H), 8.13 (d, *J* = 8.2 Hz, 1H), 8.08 (ddd, *J* = 8.2, 2.2, 1.2 Hz, 1H), 7.71 (dd, *J* = 9.0, 9.0 Hz, 1H), 7.69 (dd, *J* = 13.5, 2.2 Hz, 1H), 7.51 (dd, *J* = 9.0, 2.2 Hz, 1H), 5.26 (br s, 1H), 4.78–4.74 (m, 1H), 4.56 (t, *J* = 6.3 Hz, 2H), 4.15 (dd, *J* = 9.1, 9.1 Hz, 1H), 3.90 (dd, *J* = 9.1 Hz, 6.3 Hz, 1H), 3.71 (d, *J* = 12.3 Hz, 1H), 3.59 (d, *J* = 12.3 Hz, 1H), 2.77 (t, *J* = 6.3 Hz, 2H), 2.65 (br s, 4H), 2.37 (br s, 4H); <sup>13</sup>C NMR (150.6 MHz, DMSO-*d*<sub>6</sub>): δ 159.3 (d, *J* = 245 Hz), 154.4, 149.0 (d, *J* = 3.7 Hz), 149.0, 146.6, 140.2 (d, *J* = 11.2 Hz), 136.9 (d, *J* = 3.2 Hz), 130.8 (d, *J* = 4.6 Hz), 129.4, 123.8, 119.2 (d, *J* = 10.6 Hz), 119.1, 114.0 (d, *J* = 3.0 Hz), 105.4 (d, *J* = 28.5 Hz), 73.5, 61.6, 57.7, 53.9, 46.9, 46.0, 45.6; R<sub>f</sub> = 0.08 (MeOH:CHCl<sub>3</sub>, 1:4); FT-IR (ATR): ν 3370 (O-H), 3131 (N-H), 1728 (C=O) cm<sup>-1</sup>; HR-MS (ESI): *m/z* [M+H]<sup>+</sup> calculated for C<sub>23</sub>H<sub>27</sub>FN<sub>7</sub>O<sub>3</sub><sup>+</sup>: 468.2154, found: 468.2150.

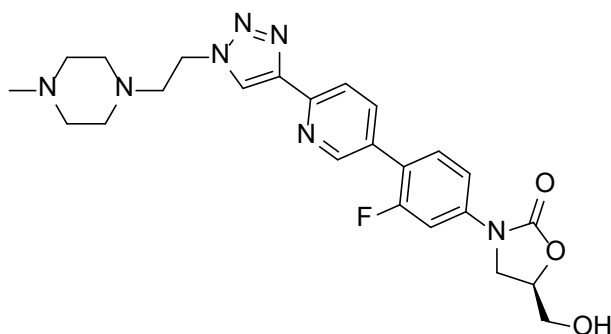

**13**

(5*R*)-3-[3-Fluoro-4-(6-{1-[2-(4-methylpiperazin-1-yl)ethyl]-1*H*-1,2,3-triazol-4-yl}pyridin-3-yl)phenyl]-5-(hydroxymethyl)-1,3-oxazolidin-2-one (**13**)

The title compound **13** was synthesised as a white solid (53 mg, 77%) according to general procedure B. <sup>1</sup>H NMR (600 MHz, DMSO-*d*<sub>6</sub>): δ 8.79 (br s, 1H), 8.63 (s, 1H), 8.13 (d, *J* = 8.2 Hz, 1H), 8.08 (ddd, *J* = 8.6, 2.1, 1.3 Hz), 7.71 (dd, *J* = 8.9, 8.9 Hz, 1H), 7.69 (dd, *J* = 13.1, 2.2 Hz, 1H), 7.51 (dd, *J* = 8.9, 2.1 Hz, 1H), 5.26 (br s, 1H), 4.78–4.74 (m, 1H), 4.56 (t, *J* = 6.1 Hz, 2H), 4.15 (dd, *J* = 9.0, 9.0 Hz, 1H), 3.90 (dd, *J* = 9.0, 6.1 Hz, 1H), 3.70 (dd, *J* = 12.2, 2.4 Hz, 1H), 3.59 (dd, *J* = 12.2, 2.4 Hz, 1H), 2.81 (t, *J* = 6.1 Hz, 2H), 2.45 (br s, 4H), 2.28 (br s, 4H), 2.13 (s, 3H); <sup>13</sup>C NMR (150.9 MHz, DMSO-*d*<sub>6</sub>): δ 159.3 (d, *J* = 245.2 Hz), 154.4, 149.0 (d, *J* = 3.8 Hz), 149.0, 146.6, 140.2 (d, *J* = 11.4 Hz), 136.9 (d, *J* = 2.9 Hz), 130.8 (d, *J* = 4.4 Hz), 129.4, 123.7, 119.2, 119.1, 114.0 (d, *J* = 3.3 Hz), 105.4 (*J* = 28.5 Hz), 73.4, 61.6, 56.9, 54.7, 52.4, 47.0, 46.0, 45.7; *R*<sub>f</sub> = 0.25 (MeOH:CHCl<sub>3</sub>:NH<sub>3</sub>, 1:9:0.05); FT-IR (ATR): ν 3468 (O-H), 1738 (C=O) cm<sup>-1</sup>; HR-MS (ESI): *m/z* [M+H]<sup>+</sup> calculated for C<sub>24</sub>H<sub>29</sub>FN<sub>7</sub>O<sub>3</sub><sup>+</sup>: 482.2310, found: 482.2310.

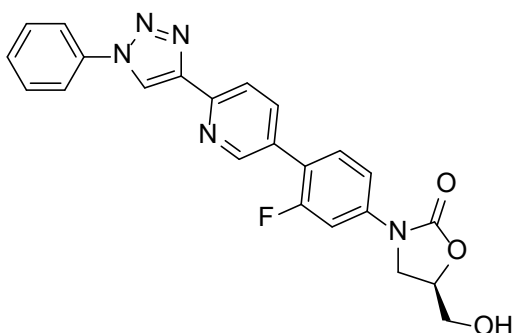

**14**

(5*R*)-3-{3-Fluoro-4-[6-(1-phenyl-1*H*-1,2,3-triazol-4-yl)pyridin-3-yl]phenyl}-5-(hydroxymethyl)-1,3-oxazolidin-2-one (**14**)

The title compound **14** was synthesised as a white solid (35 mg, 69%) according to general procedure B. <sup>1</sup>H NMR (600 MHz, DMSO-*d*<sub>6</sub>): δ 9.39 (s, 1H), 8.85 (br s, 1H), 8.22 (dd, *J* = 8.2,

0.4 Hz, 1H), 8.15 (ddd,  $J = 8.3, 2.2, 1.2$  Hz, 1H), 8.06–8.04 (m, 2H), 7.74 (dd,  $J = 8.8, 8.8$  Hz, 1H), 7.71 (dd,  $J = 13.5, 2.2$  Hz, 1H), 7.65–7.62 (m, 2H), 7.55–7.51 (m, 2H), 5.26 (t,  $J = 5.6$  Hz, 1H), 4.78–4.75 (m, 1H), 4.16 (dd,  $J = 9.1, 9.1$  Hz, 1H), 3.91 (dd,  $J = 9.1, 6.2$  Hz, 1H), 3.71 (ddd,  $J = 12.4, 5.6, 3.3$  Hz, 1H), 3.59 (ddd,  $J = 12.4, 5.6, 4.0$  Hz, 1H);  $^{13}\text{C}$  NMR (150.9 MHz, DMSO- $d_6$ ):  $\delta$  159.3 (d,  $J = 245$  Hz), 154.4, 149.0 (d,  $J = 3.9$  Hz), 148.4, 147.9, 140.3 (d,  $J = 11.4$  Hz), 137.0 (d,  $J = 2.8$  Hz), 136.6, 130.8 (d,  $J = 4.5$  Hz), 129.9, 129.8, 128.9, 121.4, 120.2, 119.6, 119.1 (d,  $J = 13.5$  Hz), 114.0, (d,  $J = 2.7$  Hz), 105.4 (d,  $J = 28.4$  Hz), 73.5, 61.6, 46.0;  $R_f = 0.49$  (MeOH:CHCl<sub>3</sub>, 1:19); FT-IR (ATR):  $\nu$  3350 (O-H), 1757 (C=O) cm<sup>-1</sup>; HR-MS (ESI):  $m/z$  [M+H]<sup>+</sup> calculated for C<sub>23</sub>H<sub>19</sub>FN<sub>5</sub>O<sub>3</sub><sup>+</sup>: 432.1466, found: 432.1462.

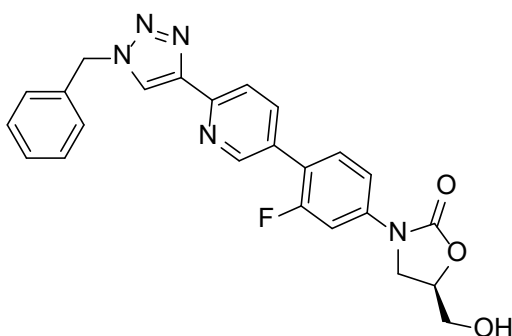

**15**

(5*R*)-3-{4-[6-(1-Benzyl-1*H*-1,2,3-triazol-4-yl)pyridin-3-yl]-3-fluorophenyl}-5-(hydroxymethyl)-1,3-oxazolidin-2-one (**15**)

The title compound **15** was synthesised as a white solid (56 mg, 77%) according to general procedure B.  $^1\text{H}$  NMR (600 MHz, DMSO- $d_6$ ):  $\delta$  8.78 (br s, 1H), 8.74 (s, 1H), 8.13 (d,  $J = 8.2$  Hz, 1H), 8.08 (d,  $J = 8.2$  Hz, 1H), 7.70 (dd,  $J = 8.6, 8.6$  Hz, 1H), 7.69 (dd,  $J = 13.7, 2.1$  Hz, 1H), 7.50 (dd,  $J = 8.6, 2.0$  Hz, 1H), 7.40–7.38 (m, 4H), 7.37–7.33 (m, 1H), 5.69 (s, 2H), 5.27 (br s, 1H), 4.78–4.74 (m, 1H), 4.15 (dd,  $J = 8.8, 8.8$  Hz, 1H), 3.90 (dd,  $J = 8.8, 6.3$  Hz, 1H), 3.72–3.70 (m, 1H), 3.60–3.58 (m, 1H);  $^{13}\text{C}$  NMR (150.9 MHz, DMSO- $d_6$ ):  $\delta$  159.3 (d,  $J = 245$  Hz), 154.3, 149.0 (d,  $J = 3.8$  Hz), 148.9, 147.1, 140.2 (d,  $J = 11.3$  Hz), 136.9 (d,  $J = 3.0$  Hz), 135.9, 130.8 (d,  $J = 4.5$  Hz), 129.5, 128.8, 128.2, 128.0, 123.6, 119.2, 119.1 (d,  $J = 13.4$  Hz), 114.0 (d,  $J = 2.4$  Hz), 105.4 (d,  $J = 28.6$  Hz), 73.5, 61.6, 53.1, 46.0;  $R_f = 0.39$  (MeOH:CHCl<sub>3</sub>, 1:19); FT-IR (ATR):  $\nu$  3366 (O-H), 1745 (C=O) cm<sup>-1</sup>; HR-MS (ESI):  $m/z$  [M+H]<sup>+</sup> calculated for C<sub>24</sub>H<sub>21</sub>FN<sub>5</sub>O<sub>3</sub><sup>+</sup>: 446.1623, found: 446.1620.

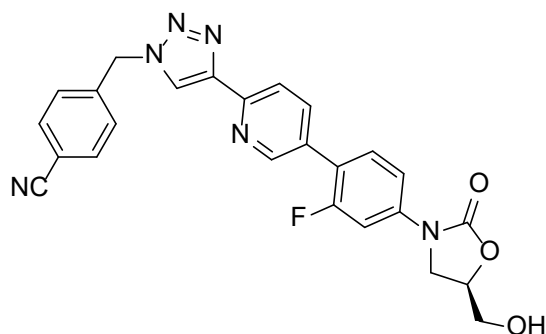

**16**

4-{[4-(5-{2-Fluoro-4-[(5*R*)-5-(hydroxymethyl)-2-oxo-1,3-oxazolidin-3-yl]phenyl}pyridin-2-yl)-1*H*-1,2,3-triazol-1-yl]methyl}benzonitrile (**16**)

The title compound **16** was synthesised as a white solid (37 mg, 48%) according to general procedure B.  $^1\text{H}$  NMR (600 MHz,  $\text{DMSO-}d_6$ ):  $\delta$  8.79 (s, 1H), 8.78 (br s, 1H), 8.13 (d,  $J = 8.2$  Hz, 1H), 8.09 (ddd,  $J = 8.2, 2.1, 1.2$  Hz, 1H), 7.87–7.86 (m, 2H), 7.69 (dd,  $J = 9.1, 9.1$  Hz, 1H), 7.67 (dd,  $J = 14.0, 1.9$  Hz, 1H), 7.54–7.52 (m, 2H), 7.49 (dd,  $J = 8.4, 1.9$  Hz, 1H), 5.81 (s, 2H), 5.31 (br s, 1H), 4.77–4.73 (m, 1H), 4.14 (dd,  $J = 9.0, 9.0$  Hz, 1H), 3.89 (dd,  $J = 9.0, 6.6$  Hz, 1H), 3.70 (d,  $J = 11.8$  Hz, 1H), 3.56 (d,  $J = 11.8$  Hz, 1H);  $^{13}\text{C}$  NMR (150.6 MHz,  $\text{DMSO-}d_6$ ):  $\delta$  159.4 (d,  $J = 245$  Hz), 154.6, 154.4, 149.1 (d,  $J = 2.6$  Hz), 148.8, 147.4, 141.5, 140.3 (d,  $J = 3.5$  Hz), 137.2 (d,  $J = 2.7$  Hz), 133.0, 130.9 (d,  $J = 4.3$  Hz), 129.8 (d,  $J = 1.5$  Hz), 128.9, 124.2, 119.5, 119.2 (d,  $J = 13.3$  Hz), 118.7, 114.2 (d,  $J = 2.6$  Hz), 111.1, 105.5 (d,  $J = 29.1$  Hz), 73.6, 61.7, 52.6, 46.1;  $R_f = 0.12$  (MeOH: $\text{CHCl}_3$ , 3:97); FT-IR (ATR):  $\nu$  3485 (O-H), 2232 ( $\text{C}\equiv\text{N}$ ), 1739 ( $\text{C}=\text{O}$ )  $\text{cm}^{-1}$ ; HR-MS (ESI):  $m/z$   $[\text{M}+\text{H}]^+$  calculated for  $\text{C}_{25}\text{H}_{20}\text{FN}_6\text{O}_3^+$ : 471.1575, found: 471.1569.

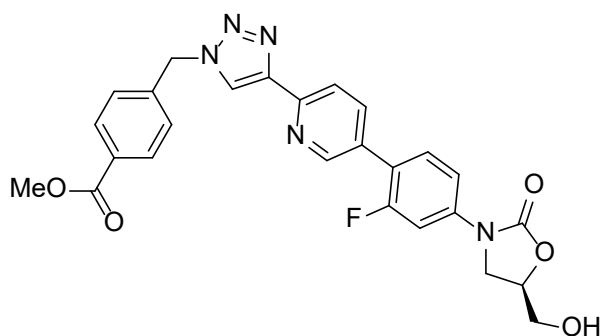

17

Methyl 4-{{4-(5-{2-fluoro-4-[(5*R*)-5-(hydroxymethyl)-2-oxo-1,3-oxazolidin-3-yl]phenyl}pyridin-2-yl)-1*H*-1,2,3-triazol-1-yl)methyl}benzoate (**17**)

The title compound **17** was synthesised as a white solid (43 mg, 70%) according to general procedure B. <sup>1</sup>H NMR (500 MHz, DMSO-*d*<sub>6</sub>): δ 8.80 (s, 1H), 8.79 (br s, 1H), 8.14 (dd, *J* = 8.2, 0.7 Hz, 1H), 8.09 (dt, *J* = 8.2, 1.4 Hz, 1H), 7.99–7.97 (m, 2H), 7.70 (dd, *J* = 8.8, 8.8 Hz, 1H), 7.69 (dd, *J* = 13.4, 2.2 Hz, 1H), 7.50 (dd, *J* = 8.8, 2.2 Hz, 1H), 7.50–7.48 (m, 2H), 5.81 (s, 2H), 5.25 (t, *J* = 5.5 Hz, 1H), 4.78–4.74 (m, 1H), 4.15 (dd, *J* = 9.1, 9.1 Hz, 1H), 3.90 (dd, *J* = 9.1, 6.2 Hz, 1H), 3.85 (s, 3H), 3.70 (ddd, *J* = 12.5, 5.5, 3.3 Hz, 1H), 3.58 (ddd, *J* = 12.5, 5.5, 4.1 Hz, 1H); <sup>13</sup>C NMR (125.8 MHz, DMSO-*d*<sub>6</sub>): δ 165.9, 159.3 (d, *J* = 245.3 Hz), 154.4, 149.0, 148.9 (d, *J* = 3.8 Hz), 147.2, 141.2, 140.2 (d, *J* = 11.2 Hz), 136.9 (d, *J* = 3.1 Hz), 130.8 (d, *J* = 4.5 Hz), 129.7, 129.6 (d, *J* = 2.0 Hz), 129.4, 128.1, 124.0, 119.2, 119.1 (d, *J* = 13.5 Hz), 114.0 (d, *J* = 2.9 Hz), 105.4 (d, *J* = 28.5 Hz), 73.5, 61.6, 52.6, 52.2, 46.0; *R*<sub>f</sub> = 0.32 (MeOH:CHCl<sub>3</sub>, 1:19); FT-IR (ATR): ν 3425 (O-H), 1710 (C=O) cm<sup>-1</sup>; HR-MS (ESI): *m/z* [M+H]<sup>+</sup> calculated for C<sub>26</sub>H<sub>23</sub>FN<sub>5</sub>O<sub>5</sub><sup>+</sup>: 504.1678, found: 504.1676.

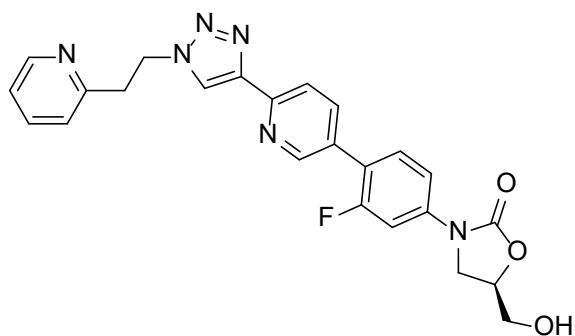

**18**

(5*R*)-3-[3-Fluoro-4-(6-{1-[2-(pyridin-2-yl)ethyl]-1*H*-1,2,3-triazol-4-yl}pyridin-3-yl)phenyl]-5-(hydroxymethyl)-1,3-oxazolidin-2-one (**18**)

The title compound **18** was synthesised as a white solid (63 mg, 87%) according to general procedure B. <sup>1</sup>H NMR (400 MHz, DMSO-*d*<sub>6</sub>): δ 8.77 (br s, 1H), 8.59 (s, 1H), 8.53 (ddd, *J* = 4.8, 1.7, 0.9 Hz, 1H), 8.11–8.05 (m, 2H), 7.72–7.66 (m, 3H), 7.50 (dd, *J* = 8.6, 2.2 Hz, 1H), 7.28–7.22 (m, 2H), 5.26 (br s, 1H), 4.87 (t, *J* = 7.1 Hz, 2H), 4.79–4.73 (m, 1H), 4.15 (dd, *J* = 9.1 Hz, 1H), 3.90 (dd, *J* = 9.1, 6.2 Hz, 1H), 3.71 (d, *J* = 11.8 Hz, 1H), 3.59 (d, *J* = 11.8 Hz, 1H), 3.42 (t, *J* = 7.1 Hz, 2H); <sup>13</sup>C NMR (100.6 MHz, DMSO-*d*<sub>6</sub>): δ 159.3 (d, *J* = 245 Hz), 157.3, 154.4, 149.2, 148.9 (d, *J* = 2.7 Hz), 146.7, 140.2 (d, *J* = 11.2 Hz), 136.9 (d, *J* = 3.2 Hz), 136.7, 130.8 (d, *J* = 4.6 Hz), 129.4 (d, *J* = 1.9 Hz), 123.4, 122.0, 119.1 (t, *J* = 6.8 Hz), 114.0 (d, *J* = 3.0 Hz), 105.4 (d, *J* = 28.5 Hz), 73.5, 61.6, 48.9, 46.0, 37.4; *R*<sub>f</sub> = 0.06 (MeOH:CHCl<sub>3</sub>, 3:97); FT-IR (ATR): ν 3386 (O-H), 1709 (C=O) cm<sup>-1</sup>; HR-MS (ESI): *m/z* [M+H]<sup>+</sup> calculated for C<sub>24</sub>H<sub>22</sub>FN<sub>6</sub>O<sub>3</sub><sup>+</sup>: 461.1732, found: 461.1729.

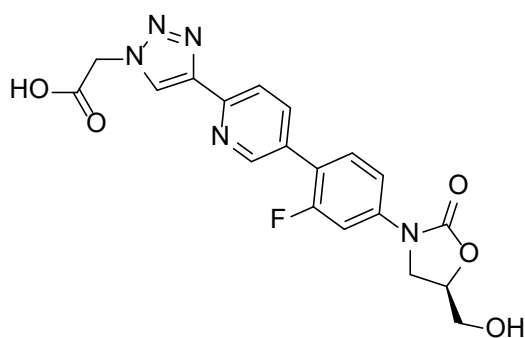

**19**

2-[4-(5-{2-Fluoro-4-[(5*R*)-5-(hydroxymethyl)-2-oxo-1,3-oxazolidin-3-yl]phenyl}pyridin-2-yl)-1*H*-1,2,3-triazol-1-yl]acetic acid (**19**)

The title compound **19** was synthesised as an off-white solid (31 mg, 42%) according to general procedure B. <sup>1</sup>H NMR (400 MHz, DMSO-*d*<sub>6</sub>): δ 8.80 (br s, 1H), 8.59 (s, 1H), 8.14 (d, *J* = 8.4

Hz, 1H), 8.08 (d,  $J = 8.4$  Hz, 1H), 7.71 (dd,  $J = 8.9, 8.9$  Hz, 1H), 7.69 (dd,  $J = 13.9, 2.1$  Hz, 1H), 7.51 (dd,  $J = 8.9, 1.9$  Hz, 1H), 7.18 (br s, 1H), 5.22 (br s, 1H), 4.79–4.73 (m, 1H), 4.15 (dd,  $J = 9.0, 9.0$  Hz, 1H), 3.90 (dd,  $J = 9.0, 6.2$  Hz, 1H), 3.71 (dd,  $J = 12.6, 3.4$  Hz, 1H), 3.59 (dd,  $J = 12.6, 3.4$  Hz, 1H);  $^{13}\text{C}$  NMR (150.9 MHz, DMSO- $d_6$ ):  $\delta$  168.3, 158.5 (d,  $J = 245$  Hz), 154.4, 149.0, 149.0, 146.6, 140.2 (d,  $J = 11.3$  Hz), 136.9, 130.8 (d,  $J = 4.2$  Hz), 129.4, 124.8, 119.1, 119.1 (d,  $J = 12.1$  Hz) 114.0 (d,  $J = 2.8$  Hz), 105.4 (d,  $J = 28.4$  Hz), 73.5, 61.6, 51.6, 46.0;  $R_f = 0.43$  (MeOH:CHCl<sub>3</sub>, 3:7); FT-IR (ATR):  $\nu$  3135 (O-H), 1733 (C=O), 1622 (C=O)  $\text{cm}^{-1}$ ; HR-MS (ESI):  $m/z$   $[\text{M}+\text{H}]^+$  calculated for C<sub>19</sub>H<sub>17</sub>FN<sub>5</sub>O<sub>5</sub><sup>+</sup>: 414.1208, found: 414.1206.

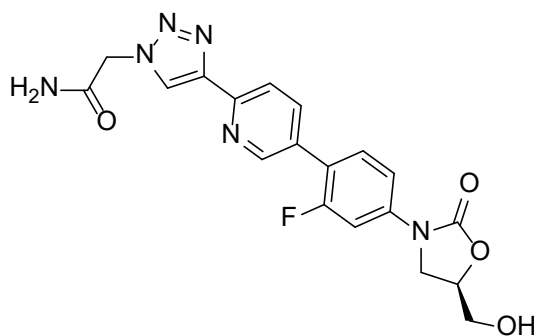

**20**

2-[4-(5-{2-Fluoro-4-[(5*R*)-5-(hydroxymethyl)-2-oxo-1,3-oxazolidin-3-yl]phenyl}pyridin-2-yl)-1*H*-1,2,3-triazol-1-yl]acetamide (**20**)

The title compound **20** was synthesised as a white solid (19 mg, 52%) according to general procedure B.  $^1\text{H}$  NMR (600 MHz, DMSO- $d_6$ ):  $\delta$  8.79 (br s, 1H), 8.57 (s, 1H), 8.13 (d,  $J = 7.8$  Hz, 1H), 8.09 (ddd,  $J = 8.4, 2.0, 1.3$  Hz, 1H), 7.80 (br s, 1H), 7.70 (dd,  $J = 8.8, 8.8$  Hz, 1H), 7.68 (dd,  $J = 13.2, 2.0$  Hz, 1H), 7.50 (dd,  $J = 8.8, 2.0$  Hz, 1H), 7.43 (br s, 1H), 5.29 (t,  $J = 5.2$  Hz, 1H), 5.17 (s, 2H), 4.77–4.74 (m, 1H), 4.15 (dd,  $J = 9.1, 9.1$  Hz, 1H), 3.89 (dd,  $J = 9.1, 6.2$  Hz, 1H), 3.70 (ddd,  $J = 12.0, 5.2, 3.6$  Hz, 1H), 3.58 (ddd,  $J = 12.0, 5.2, 4.2$  Hz, 1H);  $^{13}\text{C}$  NMR (150.9 MHz, DMSO- $d_6$ ):  $\delta$  167.4, 159.5 (d,  $J = 245$  Hz), 154.5, 149.1, 149.1 (d,  $J = 6.6$  Hz), 146.7, 140.2 (d,  $J = 10.7$  Hz), 137.1 (d,  $J = 3.3$  Hz), 130.9 (d,  $J = 4.4$  Hz), 129.6, 125.2, 121.8, 119.7, 119.3, 114.1 (d,  $J = 2.9$  Hz), 105.5 (d,  $J = 28.5$  Hz), 73.6, 61.7, 51.7, 46.1;  $R_f = 0.29$  (MeOH:CHCl<sub>3</sub>, 3:17); FT-IR (ATR):  $\nu$  3347 (O-H), 3151 (N-H), 1689 (C=O), 1682 (C=O)  $\text{cm}^{-1}$ ; HR-MS (ESI):  $m/z$   $[\text{M}+\text{H}]^+$  calculated for C<sub>19</sub>H<sub>18</sub>FN<sub>6</sub>O<sub>4</sub><sup>+</sup>: 413.1368, found: 413.1365.

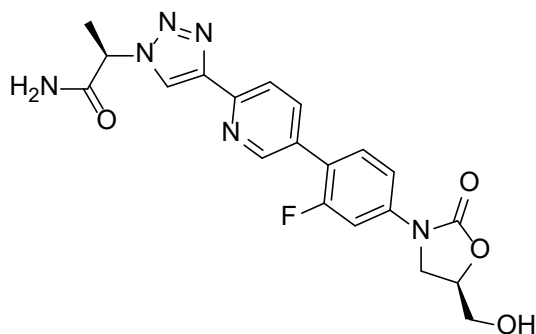

**21**

(2*R*)-2-[4-(5-{2-Fluoro-4-[(5*R*)-5-(hydroxymethyl)-2-oxo-1,3-oxazolidin-3-yl]phenyl}pyridin-2-yl)-1*H*-1,2,3-triazol-1-yl]propanamide (**21**)

The title compound (**21**) was synthesised as a white solid (42 mg, 59%) according to general procedure B. <sup>1</sup>H NMR (400 MHz, DMSO-*d*<sub>6</sub>): δ 8.81 (br s, 1H), 8.69 (s, 1H), 8.14 (d, *J* = 8.1 Hz, 1H), 8.10 (d, *J* = 8.1 Hz, 1H), 7.82 (br s, 1H), 7.71 (dd, *J* = 9.0, 9.0 Hz, 1H), 7.69 (dd, *J* = 13.8, 2.1 Hz, 1H), 7.50 (dd, *J* = 9.0, 2.1 Hz, 1H), 7.44 (br s, 1H), 5.44 (q, *J* = 7.1 Hz, 1H), 5.24 (br s, 1H), 4.79–4.73 (m, 1H), 4.15 (dd, *J* = 9.1, 9.1 Hz, 1H), 3.90 (dd, *J* = 9.1, 6.2 Hz, 1H), 3.71 (dd, *J* = 12.4, 3.2 Hz, 1H), 3.59 (dd, *J* = 12.4, 3.2 Hz, 1H), 1.77 (d, *J* = 7.1 Hz, 3H); <sup>13</sup>C NMR (100.6 MHz, DMSO-*d*<sub>6</sub>): δ 170.4, 159.2 (d, *J* = 245 Hz), 154.4, 149.0, 149.0 (d, *J* = 4.1 Hz), 146.6, 140.2 (d, *J* = 11.3 Hz), 137.0, 130.8 (d, *J* = 4.6 Hz), 129.5, 122.9, 119.3, 119.1 (d, *J* = 16.1 Hz), 114.0 (d, *J* = 2.8 Hz), 105.4 (d, *J* = 28.6 Hz), 73.5, 61.6, 58.5, 46.0, 17.9; *R*<sub>f</sub> = 0.22 (MeOH:CHCl<sub>3</sub>, 1:9); FT-IR (ATR): ν 3355 (O-H), 1710 (C=O), 1682 (C=O) cm<sup>-1</sup>; HR-MS (ESI): *m/z* [M+H]<sup>+</sup> calculated for C<sub>20</sub>H<sub>20</sub>FN<sub>6</sub>O<sub>4</sub><sup>+</sup>: 427.1525, found: 427.1521.

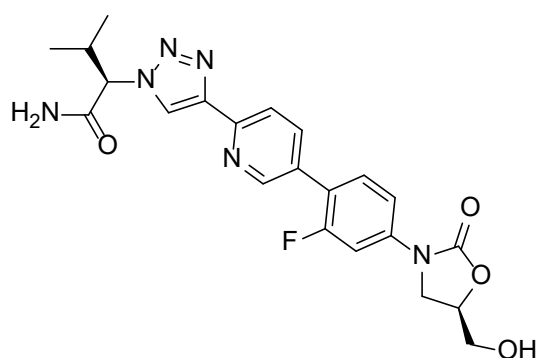

**22**

(2*R*)-2-[4-(5-{2-Fluoro-4-[(5*R*)-5-(hydroxymethyl)-2-oxo-1,3-oxazolidin-3-yl]phenyl}pyridin-2-yl)-1*H*-1,2,3-triazol-1-yl]-3-methylbutanamide (**22**)

The title compound **22** was synthesised as a white solid (40 mg, 69%) according to general procedure B. <sup>1</sup>H NMR (600 MHz, DMSO-*d*<sub>6</sub>): δ 8.80 (br s, 1H), 8.65 (s, 1H), 8.14 (dd, *J* = 8.2,

0.5 Hz, 1H), 8.09 (ddd,  $J = 8.2, 2.0, 1.4$  Hz, 1H), 8.03 (br s, 1H), 7.70 (dd,  $J = 8.8, 8.8$  Hz, 1H), 7.69 (dd,  $J = 13.7, 2.3$  Hz, 1H), 7.56 (br s, 1H), 7.50 (dd,  $J = 8.8, 2.3$  Hz, 1H), 5.26 (t,  $J = 4.8$  Hz, 1H), 5.03 (d,  $J = 10.0$  Hz, 1H), 4.78–4.74 (m, 1H), 4.15 (dd,  $J = 9.0, 9.0$  Hz, 1H), 3.90 (dd,  $J = 9.0, 6.2$  Hz, 1H), 3.71 (ddd,  $J = 12.2, 4.8, 4.1$  Hz, 1H), 3.59 (ddd,  $J = 12.2, 4.8, 4.1$  Hz, 1H), 2.54–2.46 (m, 1H), 1.02 (d,  $J = 6.6$  Hz, 3H), 0.74 (d,  $J = 6.6$  Hz, 3H);  $^{13}\text{C}$  NMR (150.9 MHz, DMSO- $d_6$ ):  $\delta$  169.1, 159.3 (d,  $J = 245$  Hz), 154.3, 149.0, 148.9 (d,  $J = 3.6$  Hz), 146.9, 140.2 (d,  $J = 11.5$  Hz), 136.9 (d,  $J = 1.7$  Hz), 130.8 (d,  $J = 4.4$  Hz), 129.5, 122.1, 119.3, 119.1 (d,  $J = 13.9$  Hz), 114.0 (d,  $J = 3.1$  Hz), 105.4 (d,  $J = 28.5$  Hz), 73.5, 69.0, 61.6, 46.0, 30.9, 19.0, 18.5;  $R_f = 0.35$  (MeOH:CHCl<sub>3</sub>, 1:9); FT-IR (ATR):  $\nu$  3404 (N-H), 3367 (O-H), 1739 (C=O), 1678 (C=O)  $\text{cm}^{-1}$ ; HR-MS (ESI):  $m/z$   $[\text{M}+\text{H}]^+$  calculated for C<sub>22</sub>H<sub>24</sub>FN<sub>6</sub>O<sub>4</sub><sup>+</sup>: 455.1838, found: 414.1836.

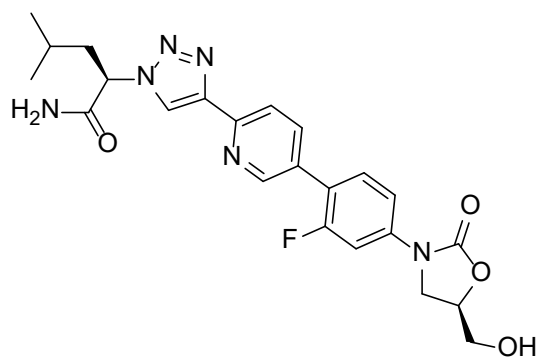

**23**

(2*R*)-2-[4-(5-{2-Fluoro-4-[(5*R*)-5-(hydroxymethyl)-2-oxo-1,3-oxazolidin-3-yl]phenyl}pyridin-2-yl)-1*H*-1,2,3-triazol-1-yl]-4-methylpentanamide (**23**)

The title compound **23** was synthesised as a white solid (45 mg, 66%) according to general procedure B.  $^1\text{H}$  NMR (600 MHz, DMSO- $d_6$ ):  $\delta$  8.80 (br s, 1H), 8.70 (s, 1H), 8.13 (d,  $J = 8.3$  Hz, 1H), 8.09 (ddd,  $J = 8.3, 2.0, 1.4$  Hz, 1H), 7.93 (br s, 1H), 7.70 (dd,  $J = 9.0, 9.0$  Hz, 1H), 7.69 (dd,  $J = 13.3, 2.0$  Hz, 1H), 7.50 (dd,  $J = 9.0, 2.0$  Hz, 1H), 7.46 (br s, 1H), 5.44 (dd,  $J = 10.4, 5.4$  Hz, 1H), 5.26 (br s, 1H), 4.78–4.74 (m, 1H), 4.15 (dd,  $J = 9.0, 9.0$  Hz, 1H), 3.90 (dd,  $J = 9.0, 6.2$  Hz, 1H), 3.71 (dd,  $J = 12.2, 2.2$  Hz, 1H), 3.59 (dd,  $J = 12.2, 2.2$  Hz, 1H), 2.19–2.14 (m, 1H), 1.94–1.89 (m, 1H), 1.30–1.24 (m, 1H), 0.92 (d,  $J = 6.6$  Hz, 3H), 0.88 (d,  $J = 6.6$  Hz, 3H);  $^{13}\text{C}$  NMR (150.9 MHz, DMSO- $d_6$ ):  $\delta$  168.8, 159.2 (d,  $J = 245$  Hz), 154.3, 149.0 (d,  $J = 4.0$  Hz), 148.9, 146.7, 140.2 (d,  $J = 11.4$  Hz), 136.9 (d,  $J = 3.2$  Hz), 130.7 (d,  $J = 4.4$  Hz), 129.5, 122.7, 119.2, 119.1 (d,  $J = 13.6$  Hz), 114.0 (d,  $J = 2.7$  Hz), 105.4 (d,  $J = 28.5$  Hz), 73.5, 61.6, 61.4, 46.0, 40.4, 24.5, 22.5, 21.2;  $R_f = 0.35$  (MeOH:CHCl<sub>3</sub>, 1:9); FT-IR (ATR):  $\nu$  3400 (N-H),

3305 (O-H), 1739 (C=O), 1676 (C=O)  $\text{cm}^{-1}$ ; HR-MS (ESI):  $m/z$   $[\text{M}+\text{H}]^+$  calculated for  $\text{C}_{22}\text{H}_{24}\text{FN}_6\text{O}_4^+$ : 469.1994, found: 469.1994.

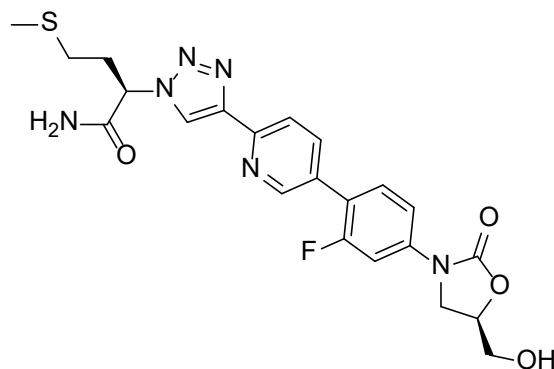

**24**

(2*R*)-2-[4-(5-{2-Fluoro-4-[(5*R*)-5-(hydroxymethyl)-2-oxo-1,3-oxazolidin-3-yl]phenyl}pyridin-2-yl)-1*H*-1,2,3-triazol-1-yl]-4-(methylsulfanyl)butanamide (**24**)

The title compound **24** was synthesised as a white solid (32 mg, 45%) according to general procedure B.  $^1\text{H}$  NMR (600 MHz,  $\text{DMSO}-d_6$ ):  $\delta$  8.80 (br s, 1H), 8.73 (s, 1H), 8.14 (d,  $J = 8.3$  Hz, 1H), 8.09 (d,  $J = 8.3$  Hz, 1H), 7.91 (br s, 1H), 7.71 (dd,  $J = 9.1, 9.1$  Hz, 1H), 7.69 (dd,  $J = 13.7, 2.0$  Hz, 1H), 7.51 (br s, 1H), 7.50 (dd,  $J = 9.1, 2.0$  Hz, 1H), 5.48 (dd,  $J = 9.0, 5.9$  Hz, 1H), 5.26 (br s, 1H), 4.78–4.74 (m, 1H), 4.15 (dd,  $J = 9.0, 9.0$  Hz, 1H), 3.90 (dd,  $J = 9.0, 6.2$  Hz, 1H), 3.71 (d,  $J = 12.0$  Hz, 1H), 3.59 (d,  $J = 12.0$  Hz, 1H), 2.44–2.33 (m, 4H), 2.06 (s, 3H);  $^{13}\text{C}$  NMR (150.9 MHz,  $\text{DMSO}-d_6$ ):  $\delta$  169.1, 159.3 (d,  $J = 245$  Hz), 154.3, 148.9 (d,  $J = 3.7$  Hz), 148.9, 146.8, 140.1 (d,  $J = 11.1$  Hz), 136.9 (d,  $J = 2.3$  Hz), 130.7 (d,  $J = 4.4$  Hz), 129.5 (d,  $J = 2.1$  Hz), 123.0, 119.3, 119.1 (d,  $J = 13.4$  Hz), 114.0 (d,  $J = 2.6$  Hz), 105.4 (d,  $J = 28.5$  Hz), 73.4, 62.0, 61.6, 46.0, 31.2, 29.5, 14.6;  $R_f = 0.36$  (MeOH: $\text{CHCl}_3$ , 3:17); FT-IR (ATR):  $\nu$  3488 (N-H), 3176 (O-H), 1742 (C=O), 1677 (C=O)  $\text{cm}^{-1}$ ; HR-MS (ESI):  $m/z$   $[\text{M}+\text{H}]^+$  calculated for  $\text{C}_{22}\text{H}_{24}\text{FN}_6\text{O}_4\text{S}^+$ : 487.1588 found: 487.1592.

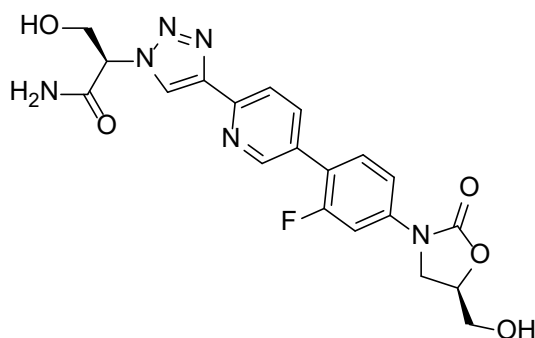

**25**

(2*R*)-2-[4-(5-{2-Fluoro-4-[(5*R*)-5-(hydroxymethyl)-2-oxo-1,3-oxazolidin-3-yl]phenyl}pyridin-2-yl)-1*H*-1,2,3-triazol-1-yl]-3-hydroxypropanamide (**25**)

The title compound **25** was synthesised as a white solid (8 mg, 15%) according to general procedure B. <sup>1</sup>H NMR (600 MHz, DMSO-*d*<sub>6</sub>): δ 8.80 (br s, 1H), 8.65 (s, 1H), 8.14 (d, *J* = 7.9 Hz, 1H), 8.10 (d, *J* = 7.9 Hz, 1H), 7.89 (br s, 1H), 7.73–7.68 (m, 2H), 7.51–7.50 (m, 2H), 5.44–5.42 (m, 2H), 5.26 (br s, 1H), 4.78–4.74 (m, 1H), 4.15 (dd, *J* = 9.0, 9.0 Hz, 1H), 4.12 (d, *J* = 7.2 Hz, 1H), 4.03 (d, *J* = 7.2 Hz, 1H), 3.90 (dd, *J* = 9.0, 6.7 Hz, 1H), 3.71 (d, *J* = 12.0 Hz, 1H), 3.59 (d, *J* = 12.0 Hz, 1H); <sup>13</sup>C NMR (150.9 MHz, DMSO-*d*<sub>6</sub>): δ 167.9, 159.3 (d, *J* = 245 Hz), 154.4, 149.0, 149.0 (d, *J* = 6.2 Hz), 146.4, 140.2 (d, *J* = 11.3 Hz), 137.0, 130.8 (d, *J* = 4.4 Hz), 129.4, 123.4, 119.2, 119.1 (d, *J* = 11.4 Hz), 114.0, 105.4 (d, *J* = 28.6 Hz), 73.5, 65.2, 61.6, 61.4, 46.0; *R*<sub>f</sub> = 0.27 (MeOH:CHCl<sub>3</sub>, 1:9); FT-IR (ATR): ν 3491 (N-H), 3306 (O-H), 1742 (C=O), 1677 (C=O) cm<sup>-1</sup>; HR-MS (ESI): *m/z* [M+H]<sup>+</sup> calculated for C<sub>20</sub>H<sub>20</sub>FN<sub>6</sub>O<sub>5</sub><sup>+</sup>: 443.1474 found: 443.1470.

**<sup>1</sup>H and <sup>13</sup>C NMR of 27 (400 MHz, CDCl<sub>3</sub>):**

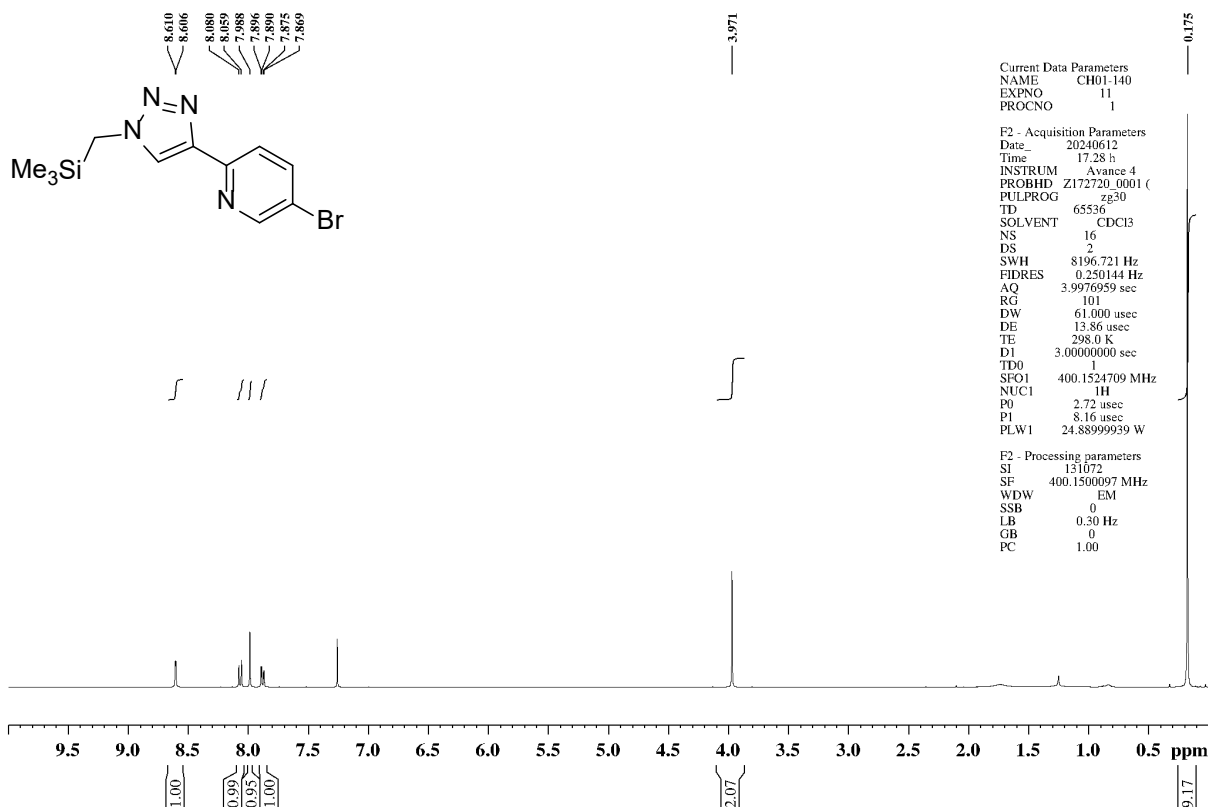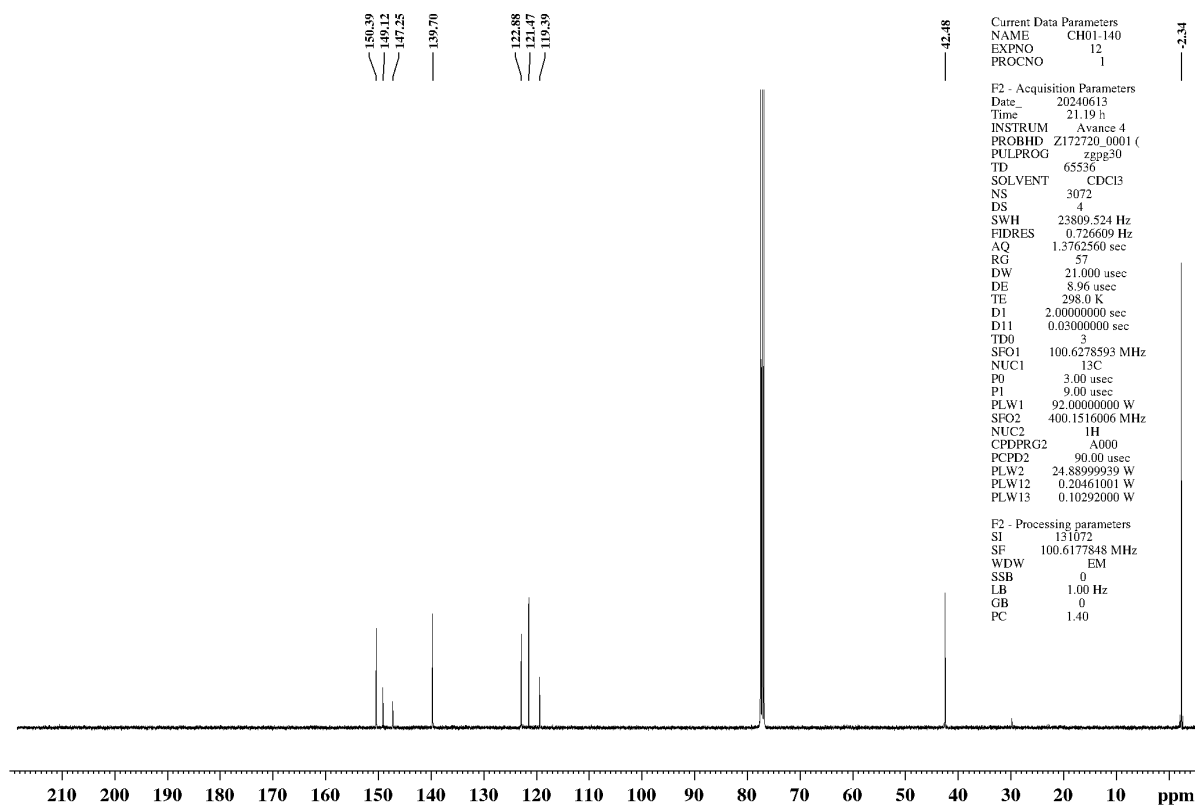

**<sup>1</sup>H and <sup>13</sup>C NMR of 28 (600 MHz, CDCl<sub>3</sub>):**

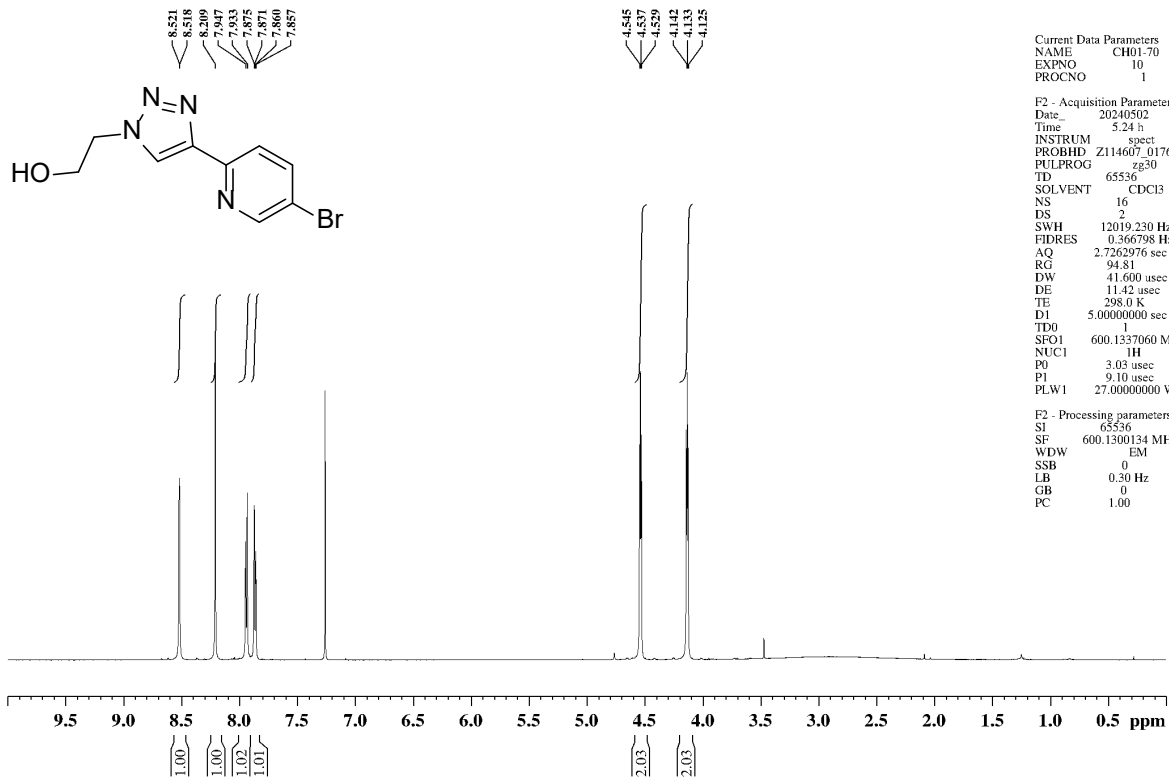

Current Data Parameters  
 NAME CH01-70  
 EXPNO 10  
 PROCNO 1

F2 - Acquisition Parameters  
 Date\_ 20240502  
 Time 5.24 h  
 INSTRUM spect  
 PROBHD Z114607\_0176 ( )  
 PULPROG zg30  
 TD 65536  
 SOLVENT CDCl3  
 NS 16  
 DS 2  
 SWH 12019.230 Hz  
 FIDRES 0.366798 Hz  
 AQ 2.7262976 sec  
 RG 94.81  
 DW 41.600 usec  
 DE 11.42 usec  
 TE 298.0 K  
 D1 5.0000000 sec  
 TD0 1  
 SFO1 600.1337060 MHz  
 NUC1 1H  
 P0 3.03 usec  
 P1 9.10 usec  
 PLW1 27.00000000 W

F2 - Processing parameters  
 SI 65536  
 SF 600.1300134 MHz  
 WDW EM  
 SSB 0  
 LB 0.30 Hz  
 GB 0  
 PC 1.00

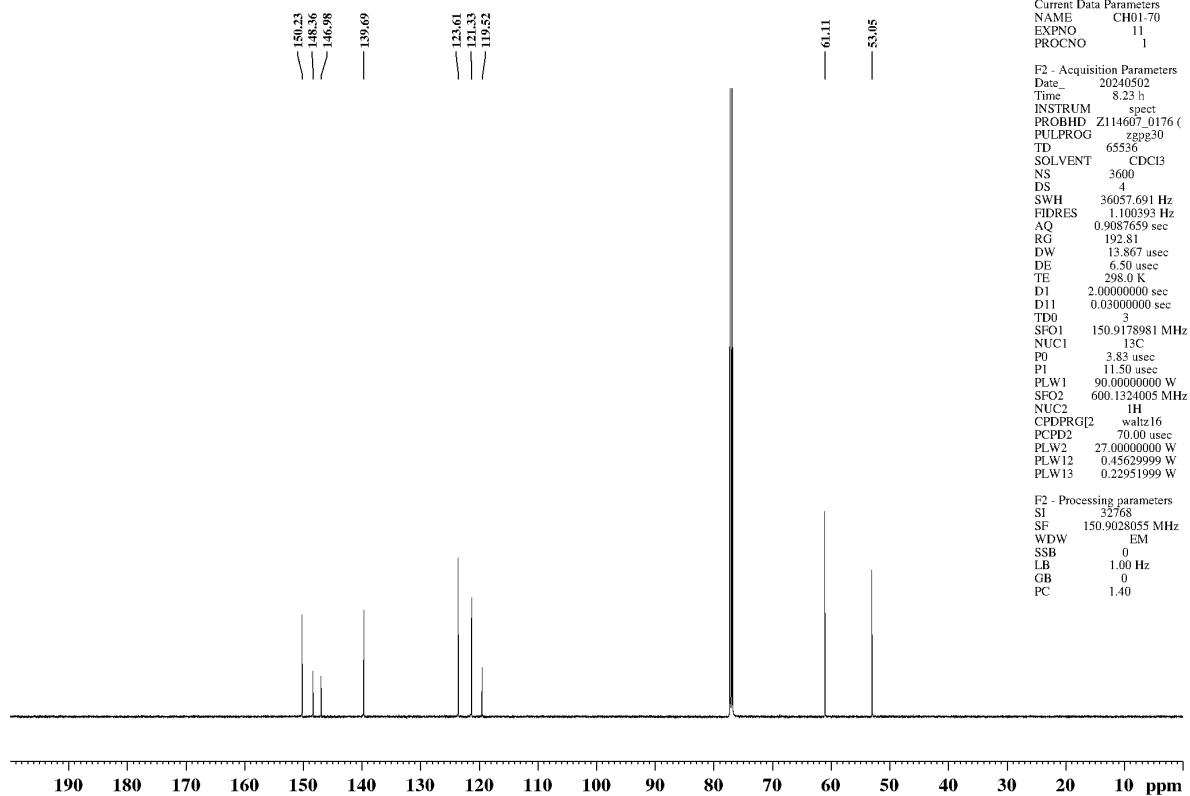

Current Data Parameters  
 NAME CH01-70  
 EXPNO 11  
 PROCNO 1

F2 - Acquisition Parameters  
 Date\_ 20240502  
 Time 8.23 h  
 INSTRUM spect  
 PROBHD Z114607\_0176 ( )  
 PULPROG zgpg30  
 TD 65536  
 SOLVENT CDCl3  
 NS 3600  
 DS 4  
 SWH 36057.691 Hz  
 FIDRES 1.100393 Hz  
 AQ 0.9087659 sec  
 RG 192.81  
 DW 13.867 usec  
 DE 6.50 usec  
 TE 298.0 K  
 D1 2.0000000 sec  
 D11 0.0300000 sec  
 TD0 3  
 SFO1 150.9178981 MHz  
 NUC1 13C  
 P0 3.83 usec  
 P1 11.50 usec  
 PLW1 90.00000000 W  
 SFO2 600.1324005 MHz  
 NUC2 1H  
 CPDPRG2 walz16  
 PCPD2 70.00 usec  
 PLW2 27.00000000 W  
 PLW12 0.45629999 W  
 PLW13 0.22951999 W

F2 - Processing parameters  
 SI 32768  
 SF 150.9028055 MHz  
 WDW EM  
 SSB 0  
 LB 1.00 Hz  
 GB 0  
 PC 1.40

**<sup>1</sup>H and <sup>13</sup>C NMR of 29 (400 MHz, CDCl<sub>3</sub>):**

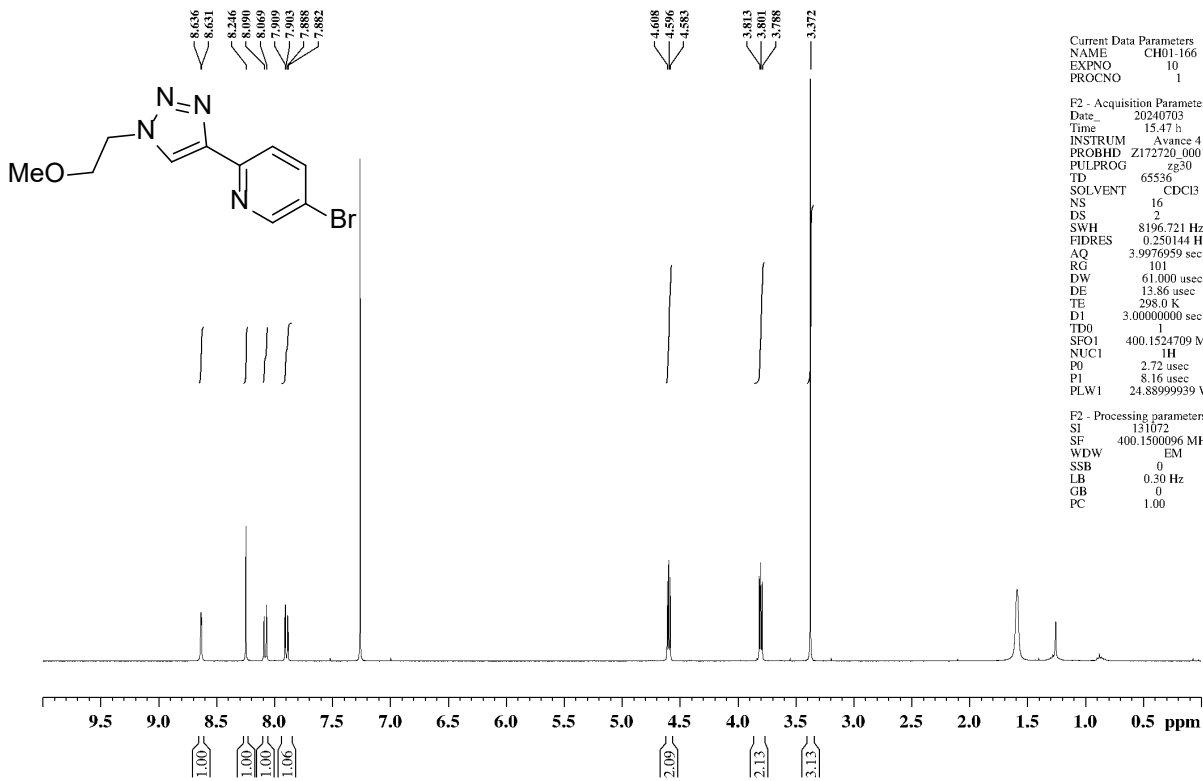

Current Data Parameters  
 NAME CH01-166  
 EXPNO 10  
 PROCNO 1

F2 - Acquisition Parameters  
 Date\_ 20240703  
 Time 15:47 h  
 INSTRUM Avance 4  
 PROBHD Z172720\_0001 (C  
 PULPROG zg30  
 TD 65536  
 SOLVENT CDCl3  
 NS 16  
 DS 2  
 SWH 8196.721 Hz  
 FIDRES 0.250144 Hz  
 AQ 3.9976959 sec  
 RG 101  
 DW 61.000 usec  
 DE 13.86 usec  
 TE 298.0 K  
 D1 3.00000000 sec  
 TD0 1  
 SFO1 400.1524709 MHz  
 NUC1 <sup>1</sup>H  
 P0 2.72 usec  
 P1 8.16 usec  
 PLW1 24.88999939 W

F2 - Processing parameters  
 SI 131072  
 SF 400.1500096 MHz  
 WDW EM  
 SSB 0  
 LB 0.30 Hz  
 GB 0  
 PC 1.00

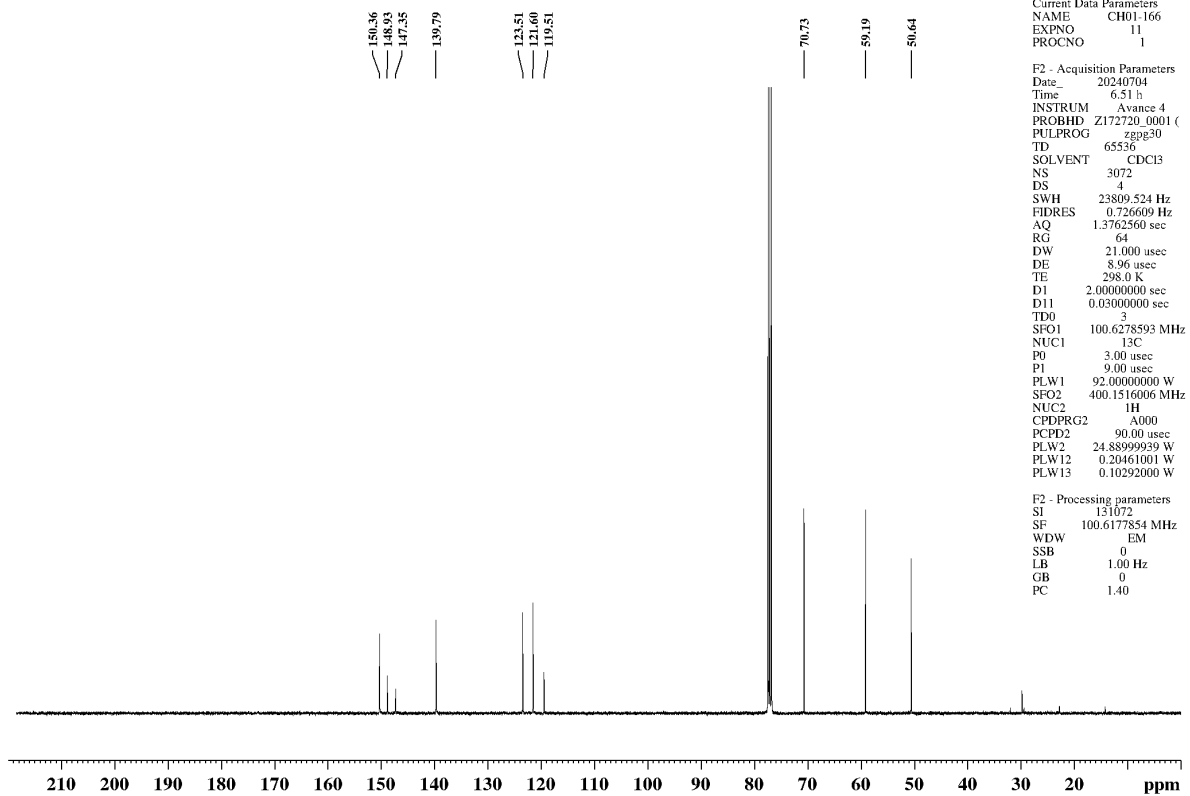

Current Data Parameters  
 NAME CH01-166  
 EXPNO 11  
 PROCNO 1

F2 - Acquisition Parameters  
 Date\_ 20240704  
 Time 6:51 h  
 INSTRUM Avance 4  
 PROBHD Z172720\_0001 (C  
 PULPROG zgpg30  
 TD 65536  
 SOLVENT CDCl3  
 NS 3072  
 DS 4  
 SWH 23809.524 Hz  
 FIDRES 0.726609 Hz  
 AQ 1.3762560 sec  
 RG 64  
 DW 21.000 usec  
 DE 8.96 usec  
 TE 298.0 K  
 D1 2.00000000 sec  
 D11 0.03000000 sec  
 TD0 3  
 SFO1 100.6278593 MHz  
 NUC1 <sup>13</sup>C  
 P0 3.00 usec  
 P1 9.00 usec  
 PLW1 92.00000000 W  
 SFO2 400.1516006 MHz  
 NUC2 <sup>1</sup>H  
 CPDPRG2 A000  
 PCPD2 90.00 usec  
 PLW2 24.88999939 W  
 PLW12 0.20461001 W  
 PLW13 0.10292000 W

F2 - Processing parameters  
 SI 131072  
 SF 100.6177854 MHz  
 WDW EM  
 SSB 0  
 LB 1.00 Hz  
 GB 0  
 PC 1.40

**<sup>1</sup>H and <sup>13</sup>C NMR of 30 (500 MHz, CD<sub>3</sub>CN):**

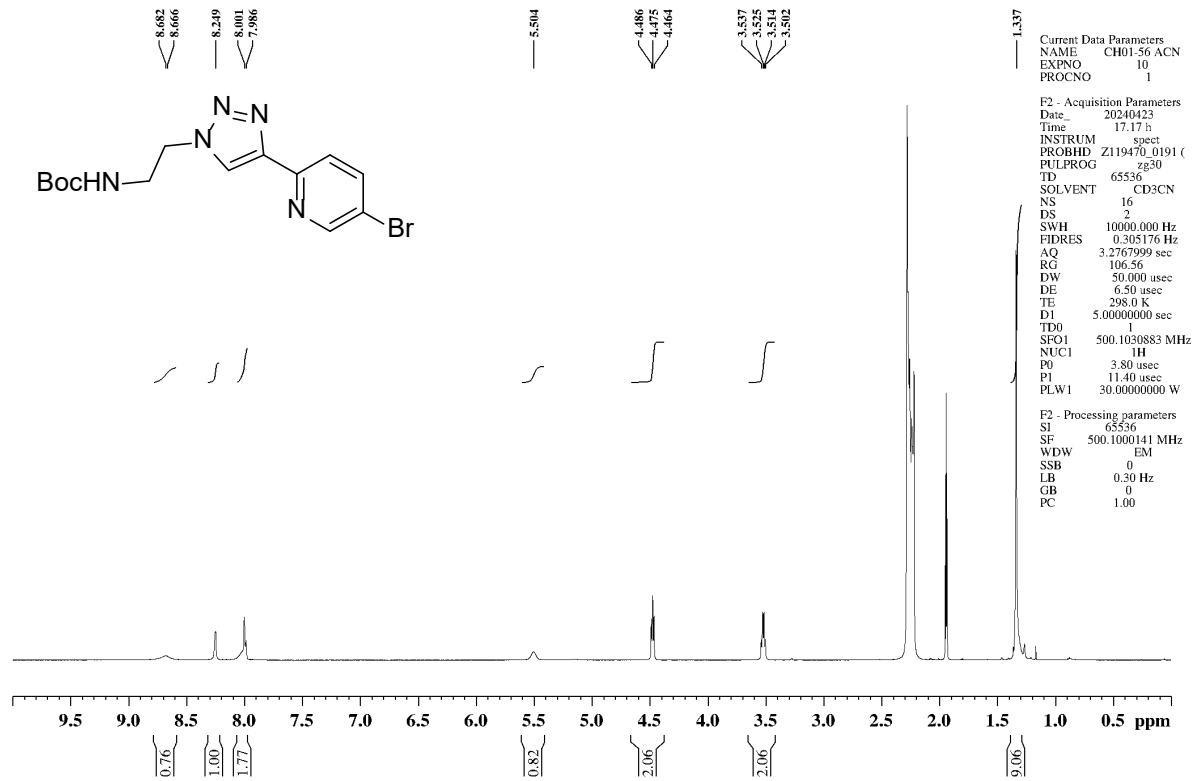

Current Data Parameters  
 NAME CH01-56 ACN  
 EXPNO 10  
 PROCNO 1

F2 - Acquisition Parameters  
 Date\_ 20240423  
 Time 17.17 h  
 INSTRUM spect  
 PROBHD Z119470\_0191 (Z)  
 PULPROG zg30  
 TD 65536  
 SOLVENT CD3CN  
 NS 16  
 DS 2  
 SWH 10000.000 Hz  
 FIDRES 0.305176 Hz  
 AQ 3.2767999 sec  
 RG 106.56  
 DW 50.000 usec  
 DE 6.50 usec  
 TE 298.0 K  
 D1 5.0000000 sec  
 TDO 1  
 SFO1 500.1030883 MHz  
 NUC1 1H  
 P0 3.80 usec  
 PL1 11.40 usec  
 PLW1 30.00000000 W

F2 - Processing parameters  
 SI 65536  
 SF 500.1000141 MHz  
 WDW EM  
 SSB 0  
 LB 0.30 Hz  
 GB 0  
 PC 1.00

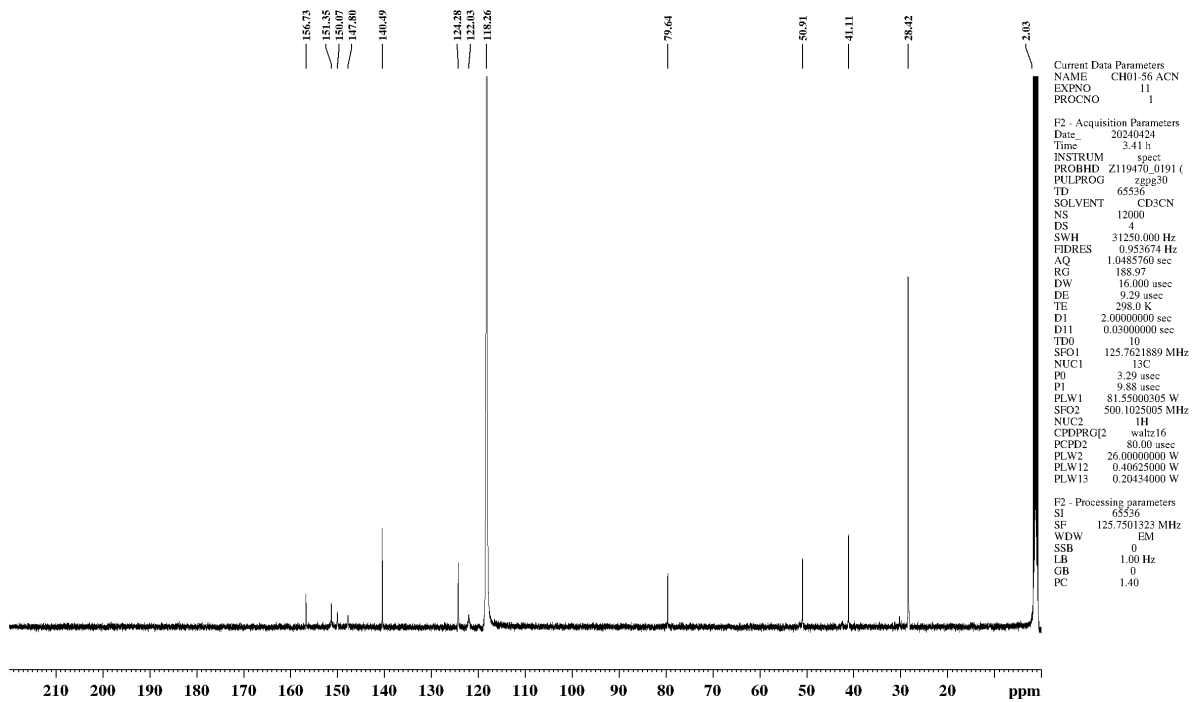

Current Data Parameters  
 NAME CH01-56 ACN  
 EXPNO 11  
 PROCNO 1

F2 - Acquisition Parameters  
 Date\_ 20240424  
 Time 3.41 h  
 INSTRUM spect  
 PROBHD Z119470\_0191 (Z)  
 PULPROG zgpg30  
 TD 65536  
 SOLVENT CD3CN  
 NS 12000  
 DS 4  
 SWH 31250.000 Hz  
 FIDRES 0.953674 Hz  
 AQ 1.0485760 sec  
 RG 188.97  
 DW 16.000 usec  
 DE 9.29 usec  
 TE 298.0 K  
 D1 2.0000000 sec  
 D11 0.03000000 sec  
 TDO 10  
 SFO1 125.7621889 MHz  
 NUC1 13C  
 P0 3.29 usec  
 PL1 9.88 usec  
 PLW1 81.55000305 W  
 SFO2 500.1025005 MHz  
 NUC2 1H  
 CPDPRG12 waltz16  
 PCPD2 80.00 usec  
 PLW2 26.00000000 W  
 PLW12 0.40625000 W  
 PLW13 0.20434000 W

F2 - Processing parameters  
 SI 65536  
 SF 125.7501323 MHz  
 WDW EM  
 SSB 0  
 LB 1.00 Hz  
 GB 0  
 PC 1.40

**<sup>1</sup>H and <sup>13</sup>C NMR of 31 (400 MHz, CDCl<sub>3</sub>):**

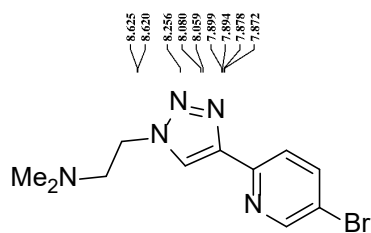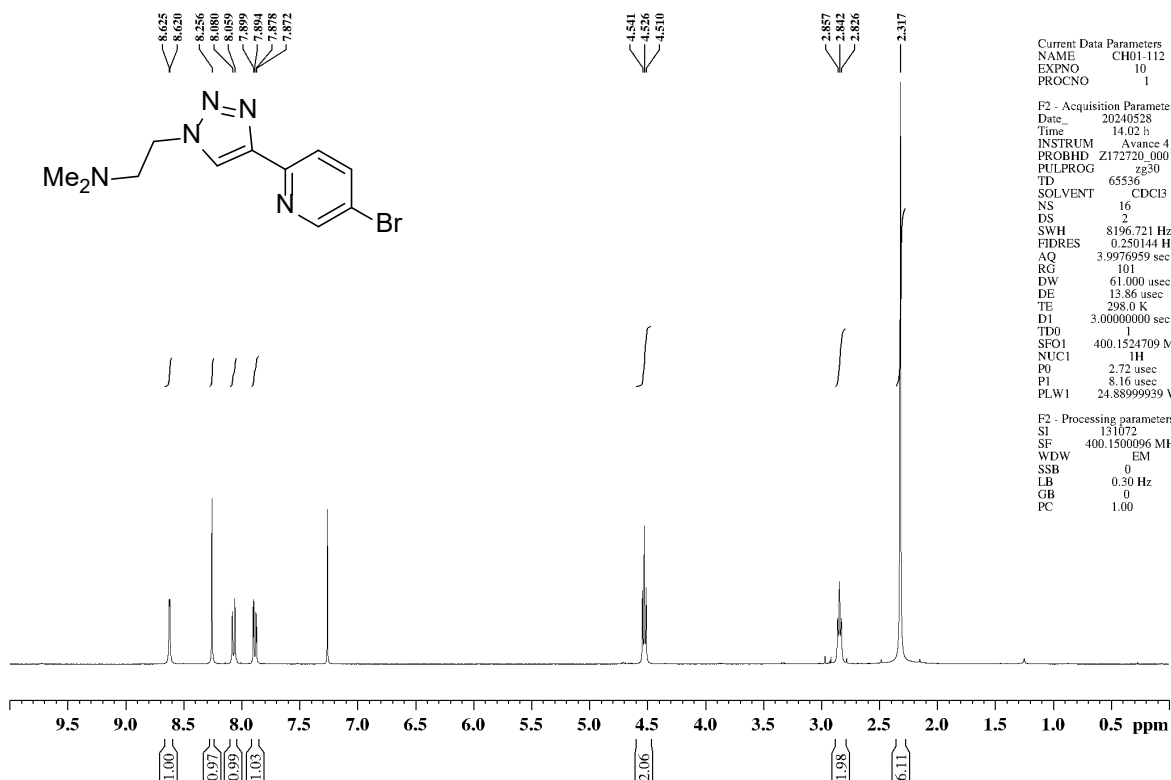

Current Data Parameters  
 NAME CH01-112  
 EXPNO 10  
 PROCNO 1  
 F2 - Acquisition Parameters  
 Date\_ 20240528  
 Time 14.02 h  
 INSTRUM Avance 4  
 PROBHD Z172720\_0001 ( )  
 PULPROG zg30  
 TD 65536  
 SOLVENT CDCl3  
 NS 16  
 DS 2  
 SWH 8196.721 Hz  
 FIDRES 0.250144 Hz  
 AQ 3.9976959 sec  
 RG 101  
 DW 61.000 usec  
 DE 12.86 usec  
 TE 298.0 K  
 D1 3.00000000 sec  
 TD0 1  
 SFO1 400.1524709 MHz  
 NUC1 <sup>1</sup>H  
 P0 2.72 usec  
 P1 8.16 usec  
 PLW1 24.88999939 W  
 F2 - Processing parameters  
 SI 131072  
 SF 400.1500096 MHz  
 WDW EM  
 SSB 0  
 LB 0.30 Hz  
 GB 0  
 PC 1.00

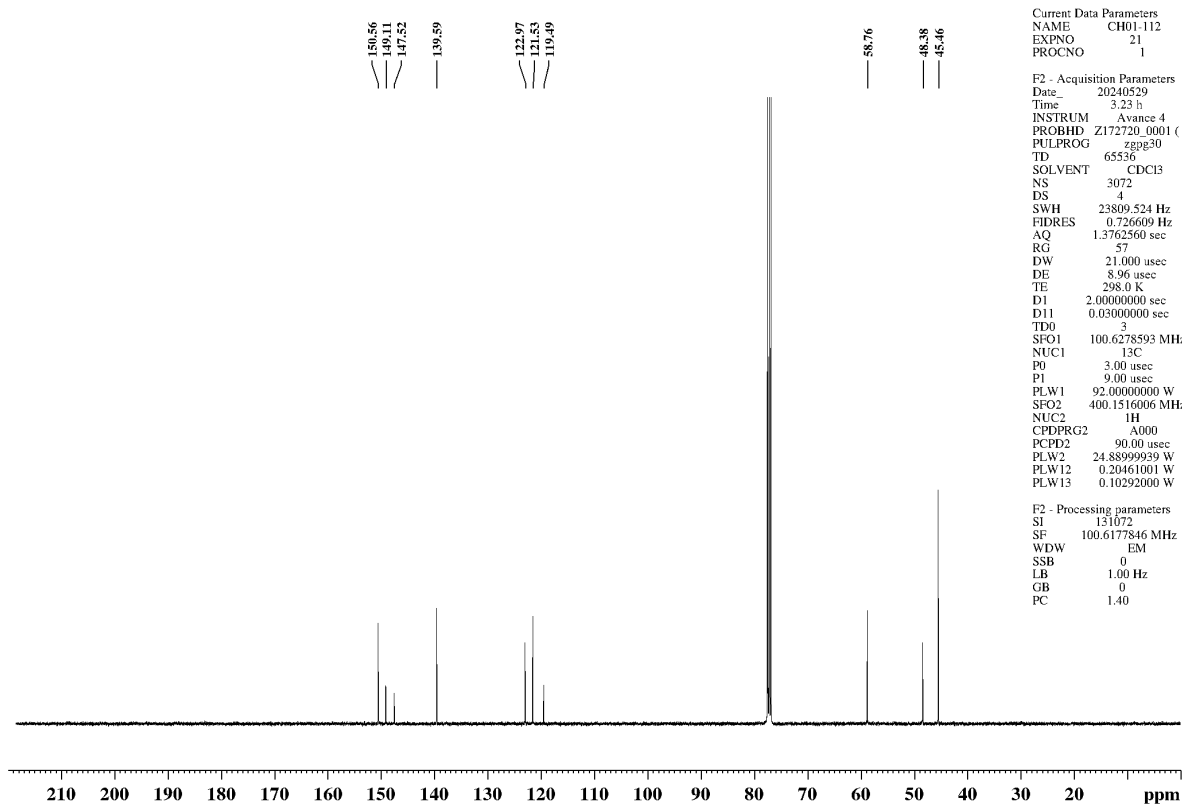

Current Data Parameters  
 NAME CH01-112  
 EXPNO 21  
 PROCNO 1  
 F2 - Acquisition Parameters  
 Date\_ 20240529  
 Time 3.23 h  
 INSTRUM Avance 4  
 PROBHD Z172720\_0001 ( )  
 PULPROG zgpg30  
 TD 65536  
 SOLVENT CDCl3  
 NS 3072  
 DS 4  
 SWH 23809.524 Hz  
 FIDRES 0.726609 Hz  
 AQ 1.3762560 sec  
 RG 57  
 DW 21.000 usec  
 DE 8.96 usec  
 TE 298.0 K  
 D1 2.00000000 sec  
 D11 0.03000000 sec  
 TD0 3  
 SFO1 100.6278593 MHz  
 NUC1 <sup>13</sup>C  
 P0 3.00 usec  
 P1 9.00 usec  
 PLW1 92.0000000 W  
 SFO2 400.1516006 MHz  
 NUC2 <sup>1</sup>H  
 CPDPRG2 A000  
 PCPD2 90.00 usec  
 PLW2 24.88999939 W  
 PLW12 0.20461001 W  
 PLW13 0.10292000 W  
 F2 - Processing parameters  
 SI 131072  
 SF 100.6177846 MHz  
 WDW EM  
 SSB 0  
 LB 1.00 Hz  
 GB 0  
 PC 1.40

**<sup>1</sup>H and <sup>13</sup>C NMR of 32 (400 MHz, CDCl<sub>3</sub>):**

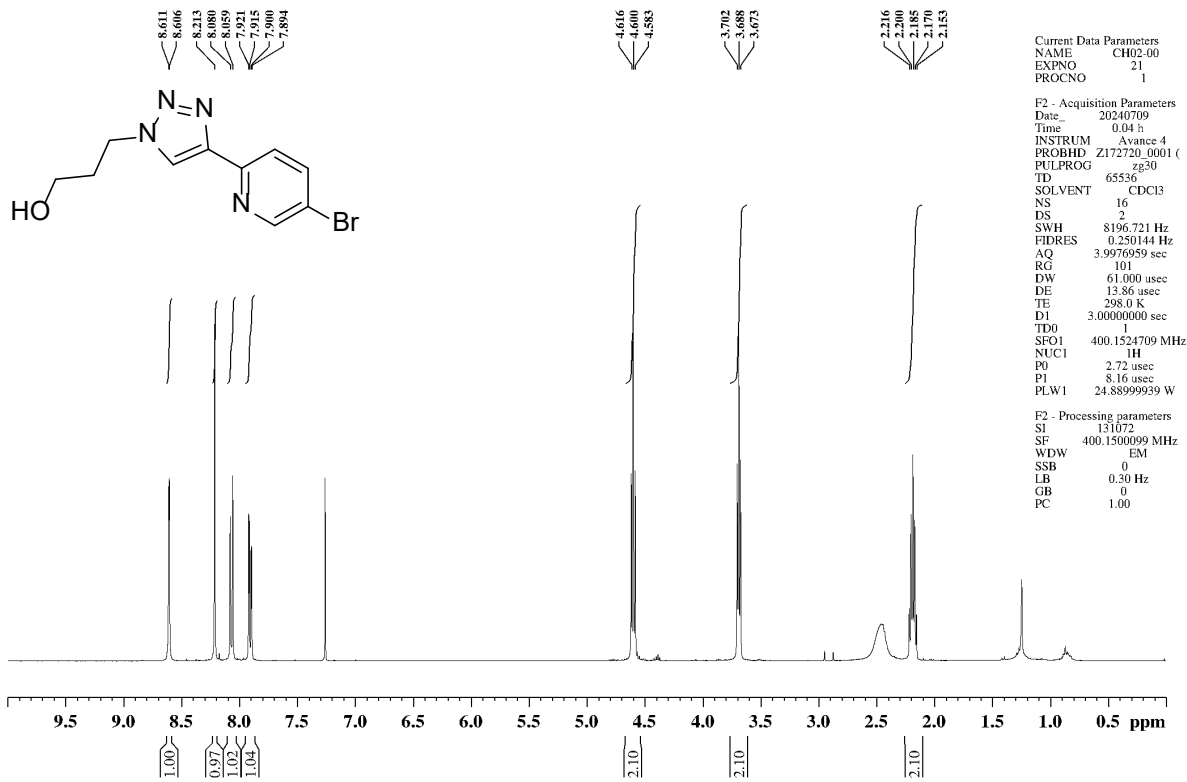

Current Data Parameters  
 NAME CH02-00  
 EXPNO 21  
 PROCNO 1

F2 - Acquisition Parameters  
 Date\_ 20240709  
 Time 0.04 h  
 INSTRUM Avance 4  
 PROBHD Z172720\_0001 ( )  
 PULPROG zg30  
 TD 65536  
 SOLVENT CDCl3  
 NS 16  
 DS 2  
 SWH 8196.721 Hz  
 FIDRES 0.250144 Hz  
 AQ 3.9976959 sec  
 RG 101  
 DW 61.000 usec  
 DE 13.86 usec  
 TE 298.0 K  
 D1 3.00000000 sec  
 TD0 1  
 SFO1 400.1524709 MHz  
 NUC1 <sup>1</sup>H  
 P0 2.72 usec  
 P1 8.16 usec  
 PLW1 24.88999939 W

F2 - Processing parameters  
 SI 131072  
 SF 400.1500099 MHz  
 WDW EM  
 SSB 0  
 LB 0.30 Hz  
 GB 0  
 PC 1.00

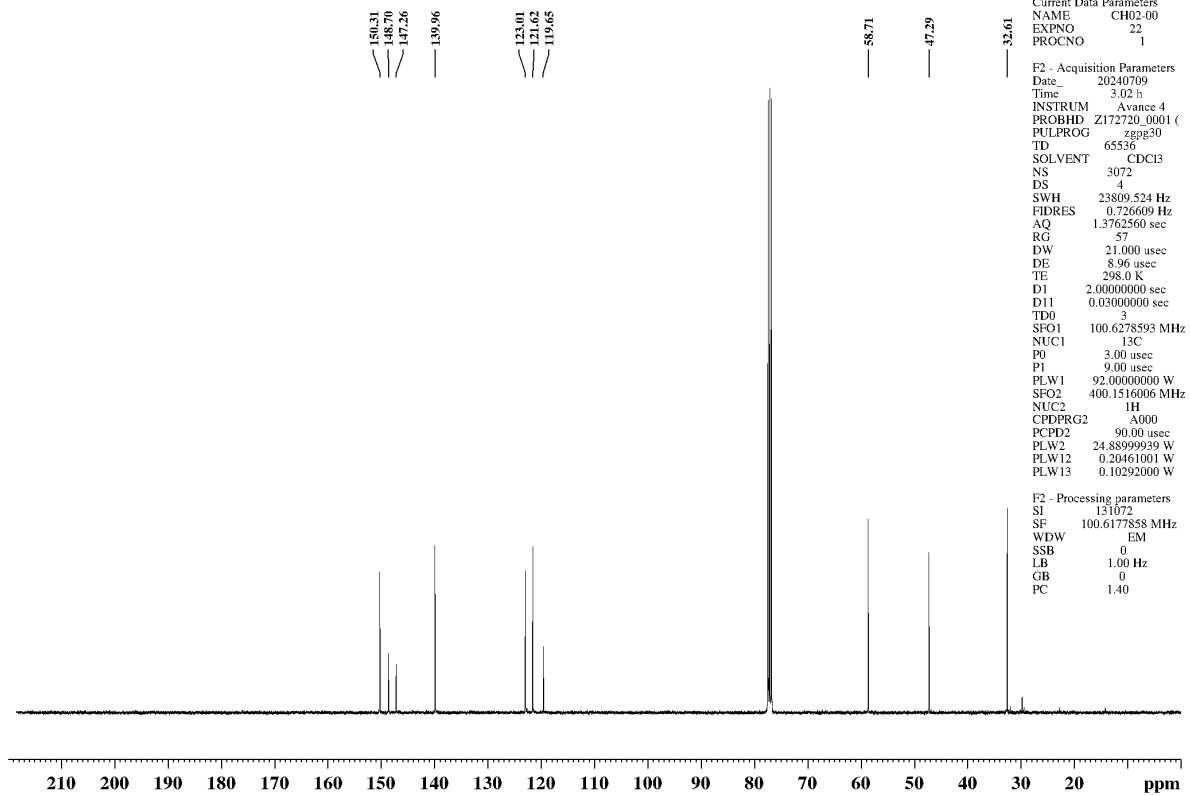

Current Data Parameters  
 NAME CH02-00  
 EXPNO 22  
 PROCNO 1

F2 - Acquisition Parameters  
 Date\_ 20240709  
 Time 3.02 h  
 INSTRUM Avance 4  
 PROBHD Z172720\_0001 ( )  
 PULPROG zgpg30  
 TD 65536  
 SOLVENT CDCl3  
 NS 3072  
 DS 4  
 SWH 23809.524 Hz  
 FIDRES 0.726609 Hz  
 AQ 1.3762560 sec  
 RG 57  
 DW 21.000 usec  
 DE 8.96 usec  
 TE 298.0 K  
 D1 2.00000000 sec  
 D11 0.03000000 sec  
 TD0 3  
 SFO1 100.6278593 MHz  
 NUC1 <sup>13</sup>C  
 P0 3.00 usec  
 P1 9.00 usec  
 PLW1 92.00000000 W  
 SFO2 400.1516006 MHz  
 NUC2 <sup>1</sup>H  
 CPDPRG2 A000  
 PCPD2 90.00 usec  
 PLW2 24.88999939 W  
 PLW12 0.20461001 W  
 PLW13 0.10292000 W

F2 - Processing parameters  
 SI 131072  
 SF 100.6177858 MHz  
 WDW EM  
 SSB 0  
 LB 1.00 Hz  
 GB 0  
 PC 1.40

**<sup>1</sup>H and <sup>13</sup>C NMR of 33 (600 MHz, CDCl<sub>3</sub>):**

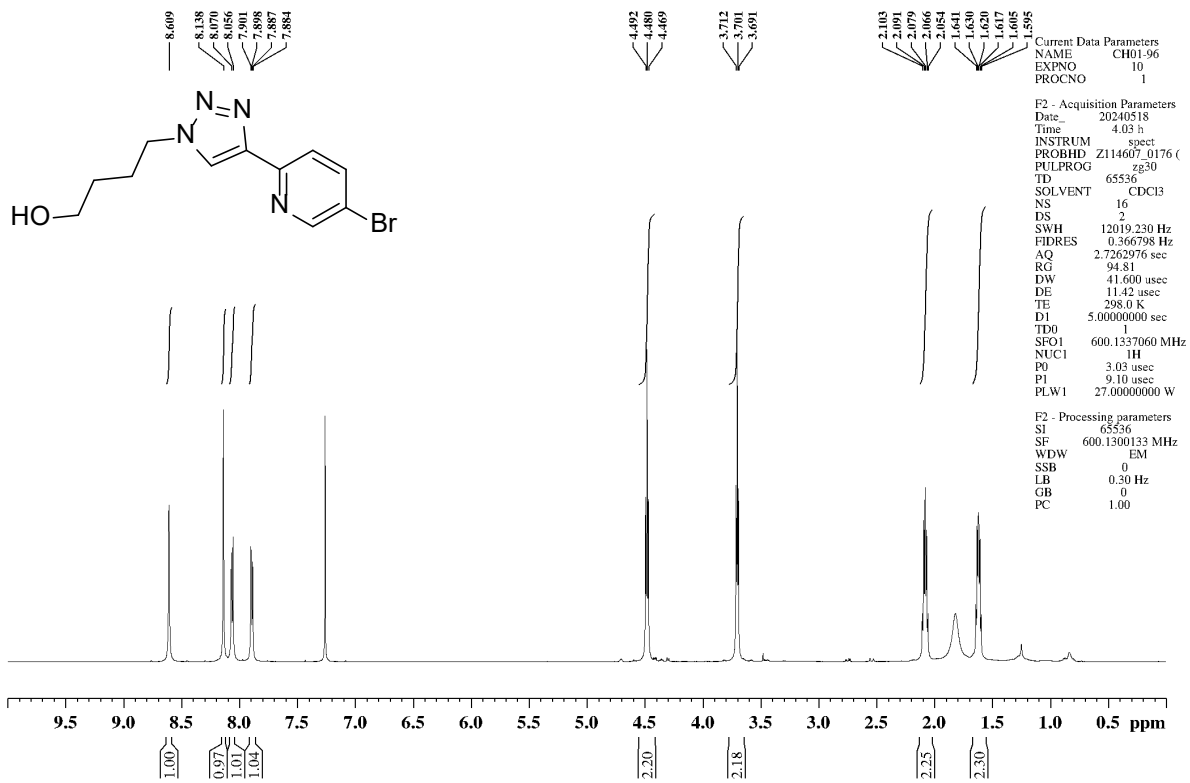

Current Data Parameters  
 NAME CH01-96  
 EXPNO 10  
 PROCNO 1

F2 - Acquisition Parameters  
 Date\_ 20240518  
 Time 4.03 h  
 INSTRUM spect  
 PROBHD Z114607\_0176 ( )  
 PULPROG zg30  
 TD 65536  
 SOLVENT CDCl3  
 NS 16  
 DS 2  
 SWH 12019.230 Hz  
 FIDRES 0.366798 Hz  
 AQ 2.7262976 sec  
 RG 94.81  
 DW 41.600 usec  
 DE 11.42 usec  
 TE 298.0 K  
 D1 5.0000000 sec  
 TD0 1  
 SFO1 600.1337060 MHz  
 NUC1 1H  
 PO 3.03 usec  
 P1 9.10 usec  
 PLW1 27.00000000 W

F2 - Processing parameters  
 SI 65536  
 SF 600.1300133 MHz  
 WDW EM  
 SSB 0  
 LB 0.30 Hz  
 GB 0  
 PC 1.00

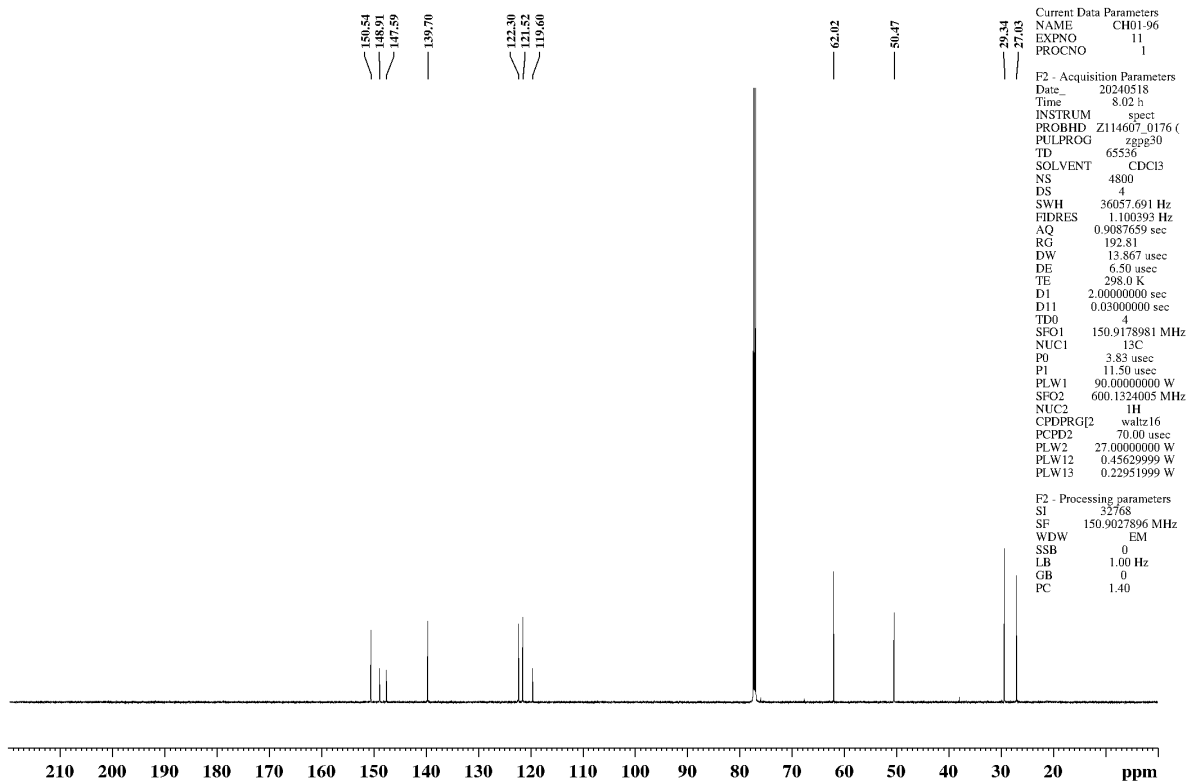

Current Data Parameters  
 NAME CH01-96  
 EXPNO 11  
 PROCNO 1

F2 - Acquisition Parameters  
 Date\_ 20240518  
 Time 8.02 h  
 INSTRUM spect  
 PROBHD Z114607\_0176 ( )  
 PULPROG zgpg30  
 TD 65536  
 SOLVENT CDCl3  
 NS 4800  
 DS 4  
 SWH 36057.691 Hz  
 FIDRES 1.100393 Hz  
 AQ 0.9087659 sec  
 RG 192.81  
 DW 13.867 usec  
 DE 6.50 usec  
 TE 298.0 K  
 D1 2.0000000 sec  
 D11 0.0300000 sec  
 TD0 4  
 SFO1 150.9178981 MHz  
 NUC1 13C  
 PO 3.83 usec  
 P1 11.50 usec  
 PLW1 90.00000000 W  
 SFO2 600.1324005 MHz  
 NUC2 1H  
 CPDPRG2 waltz16  
 FCPD2 70.00 usec  
 PLW2 27.00000000 W  
 PLW12 0.45629999 W  
 PLW13 0.22951999 W

F2 - Processing parameters  
 SI 32768  
 SF 150.9027896 MHz  
 WDW EM  
 SSB 0  
 LB 1.00 Hz  
 GB 0  
 PC 1.40

# <sup>1</sup>H and <sup>13</sup>C NMR of 34 (500 MHz, (CD<sub>3</sub>)<sub>2</sub>CO):

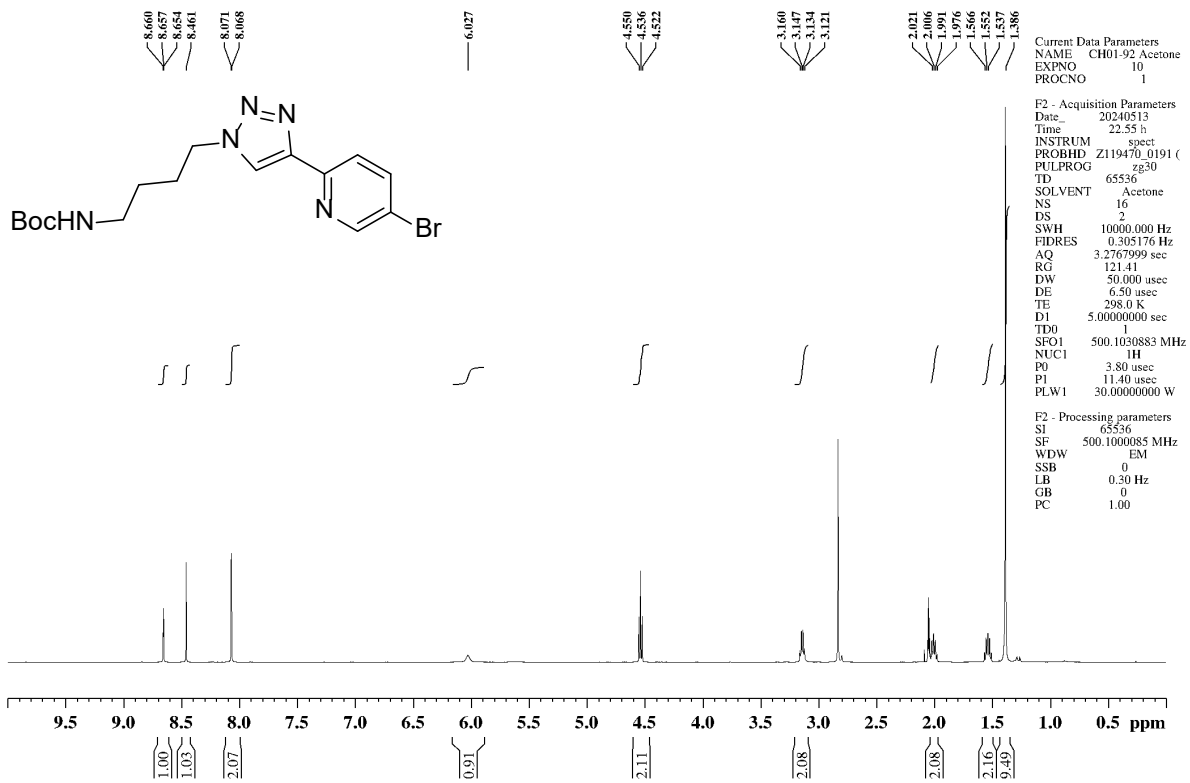

Current Data Parameters  
 NAME CH01-92 Acetone  
 EXPNO 10  
 PROCNO 1

F2 - Acquisition Parameters  
 Date\_ 20240513  
 Time 22.55 h  
 INSTRUM spect  
 PROBHD Z119470\_0191 ( )  
 PULPROG zg30  
 TD 65536  
 SOLVENT Acetone  
 NS 16  
 DS 2  
 SWH 10000.000 Hz  
 FIDRES 0.305176 Hz  
 AQ 3.2767999 sec  
 RG 121.41  
 DW 50.000 usec  
 DE 6.50 usec  
 TE 298.0 K  
 D1 5.00000000 sec  
 TD0 1  
 SFO1 500.1030833 MHz  
 NUC1 <sup>1</sup>H  
 P0 3.80 usec  
 P1 11.40 usec  
 PLW1 30.00000000 W

F2 - Processing parameters  
 SI 65536  
 SF 500.1000085 MHz  
 WDW EM  
 SSB 0  
 LB 0.30 Hz  
 GB 0  
 PC 1.00

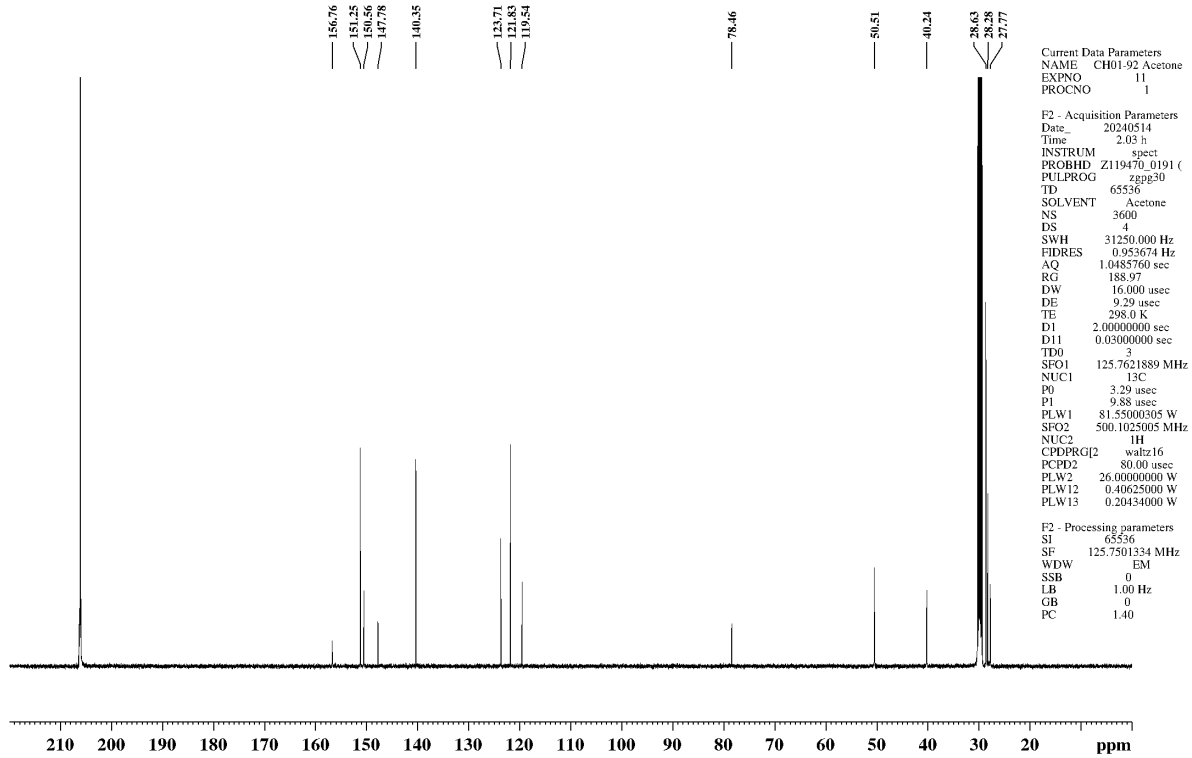

Current Data Parameters  
 NAME CH01-92 Acetone  
 EXPNO 11  
 PROCNO 1

F2 - Acquisition Parameters  
 Date\_ 20240514  
 Time 2.03 h  
 INSTRUM spect  
 PROBHD Z119470\_0191 ( )  
 PULPROG zgpg30  
 TD 65536  
 SOLVENT Acetone  
 NS 3600  
 DS 4  
 SWH 31250.000 Hz  
 FIDRES 0.953674 Hz  
 AQ 1.0485760 sec  
 RG 188.97  
 DW 16.000 usec  
 DE 9.29 usec  
 TE 298.0 K  
 D1 2.00000000 sec  
 D11 0.05000000 sec  
 TD0 3  
 SFO1 125.7621889 MHz  
 NUC1 <sup>13</sup>C  
 P0 3.29 usec  
 P1 9.88 usec  
 PLW1 81.55000305 W  
 SFO2 500.1025005 MHz  
 NUC2 <sup>1</sup>H  
 CPMRG12 waltz16  
 PCPD2 80.00 usec  
 PLW2 26.00000000 W  
 PLW12 0.40625000 W  
 PLW13 0.20434000 W

F2 - Processing parameters  
 SI 65536  
 SF 125.7501334 MHz  
 WDW EM  
 SSB 0  
 LB 1.00 Hz  
 GB 0  
 PC 1.40

**<sup>1</sup>H and <sup>13</sup>C NMR of 35 (400 MHz, (CD<sub>3</sub>)<sub>2</sub>CO):**

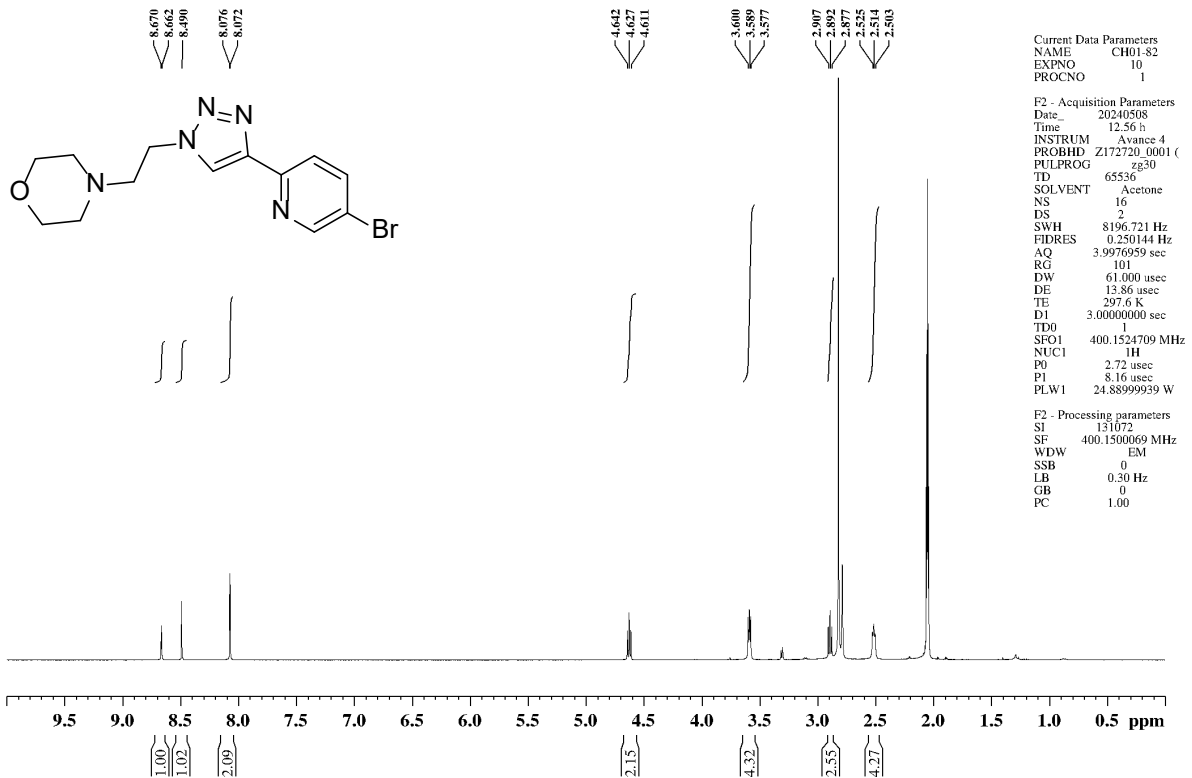

Current Data Parameters  
 NAME CH01-82  
 EXPNO 10  
 PROCNO 1

F2 - Acquisition Parameters  
 Date\_ 20240508  
 Time 12.56 h  
 INSTRUM Avance 4  
 PROBHD Z172720\_0001 ( )  
 PULPROG zgpg30  
 TD 65536  
 SOLVENT Acetone  
 NS 2  
 DS 16  
 SWH 8196.721 Hz  
 FIDRES 0.250144 Hz  
 AQ 3.9976959 sec  
 RG 101  
 DW 61.000 usec  
 DE 13.86 usec  
 TE 297.6 K  
 D1 3.00000000 sec  
 TD0  
 SFO1 400.1524709 MHz  
 NUC1 <sup>1</sup>H  
 P0 2.72 usec  
 P1 8.16 usec  
 PLW1 24.88999939 W

F2 - Processing parameters  
 SI 131072  
 SF 400.1500069 MHz  
 WDW EM  
 SSB 0  
 LB 0.30 Hz  
 GB 0  
 PC 1.00

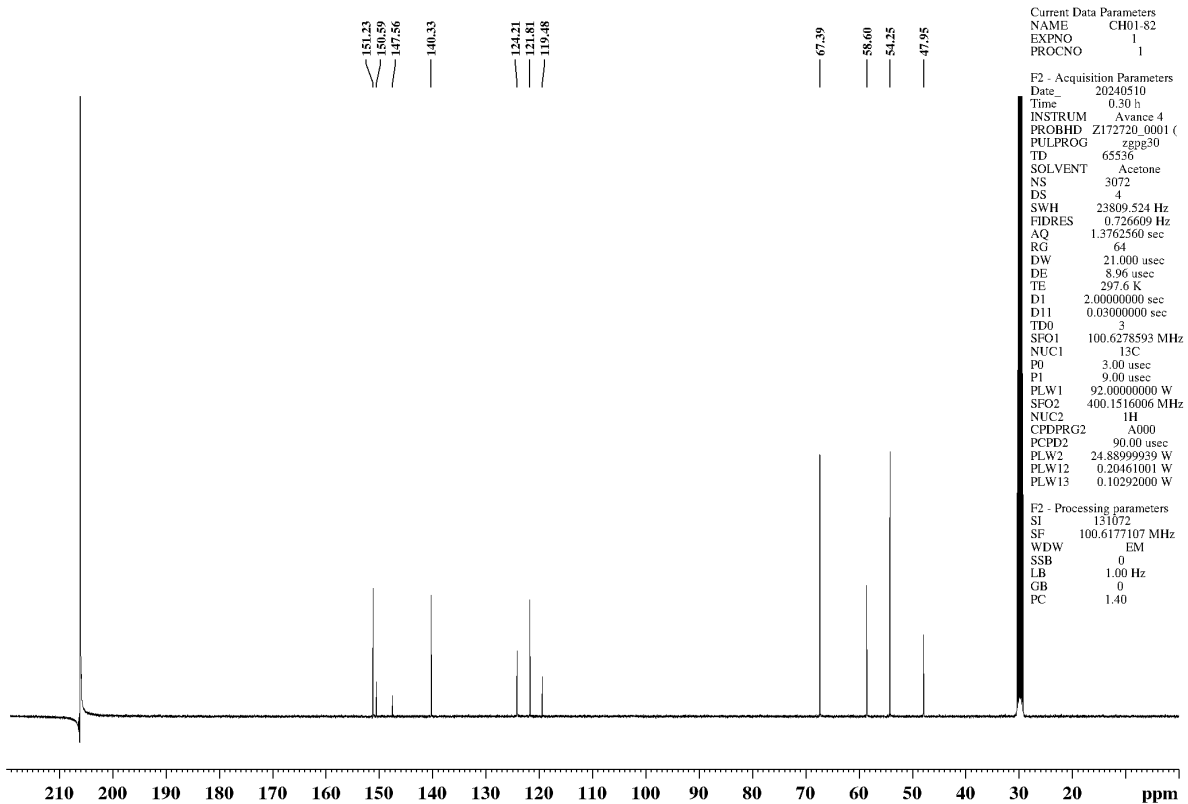

Current Data Parameters  
 NAME CH01-82  
 EXPNO 1  
 PROCNO 1

F2 - Acquisition Parameters  
 Date\_ 20240510  
 Time 0.30 h  
 INSTRUM Avance 4  
 PROBHD Z172720\_0001 ( )  
 PULPROG zgpg30  
 TD 65536  
 SOLVENT Acetone  
 NS 3072  
 DS 4  
 SWH 23809.524 Hz  
 FIDRES 0.726609 Hz  
 AQ 1.3762560 sec  
 RG 64  
 DW 21.000 usec  
 DE 8.96 usec  
 TE 297.6 K  
 D1 2.00000000 sec  
 D11 0.03000000 sec  
 TD0 3  
 SFO1 100.6278593 MHz  
 NUC1 <sup>13</sup>C  
 P0 3.00 usec  
 P1 9.00 usec  
 PLW1 92.00000000 W  
 SFO2 400.1516006 MHz  
 NUC2 <sup>1</sup>H  
 CPDPRG2 A000  
 PCPD2 90.00 usec  
 PLW2 24.88999939 W  
 PLW12 0.20461001 W  
 PLW13 0.10292000 W

F2 - Processing parameters  
 SI 131072  
 SF 100.6177107 MHz  
 WDW EM  
 SSB 0  
 LB 1.00 Hz  
 GB 0  
 PC 1.40

**<sup>1</sup>H and <sup>13</sup>C NMR of 36 (600 MHz, CD<sub>3</sub>OD):**

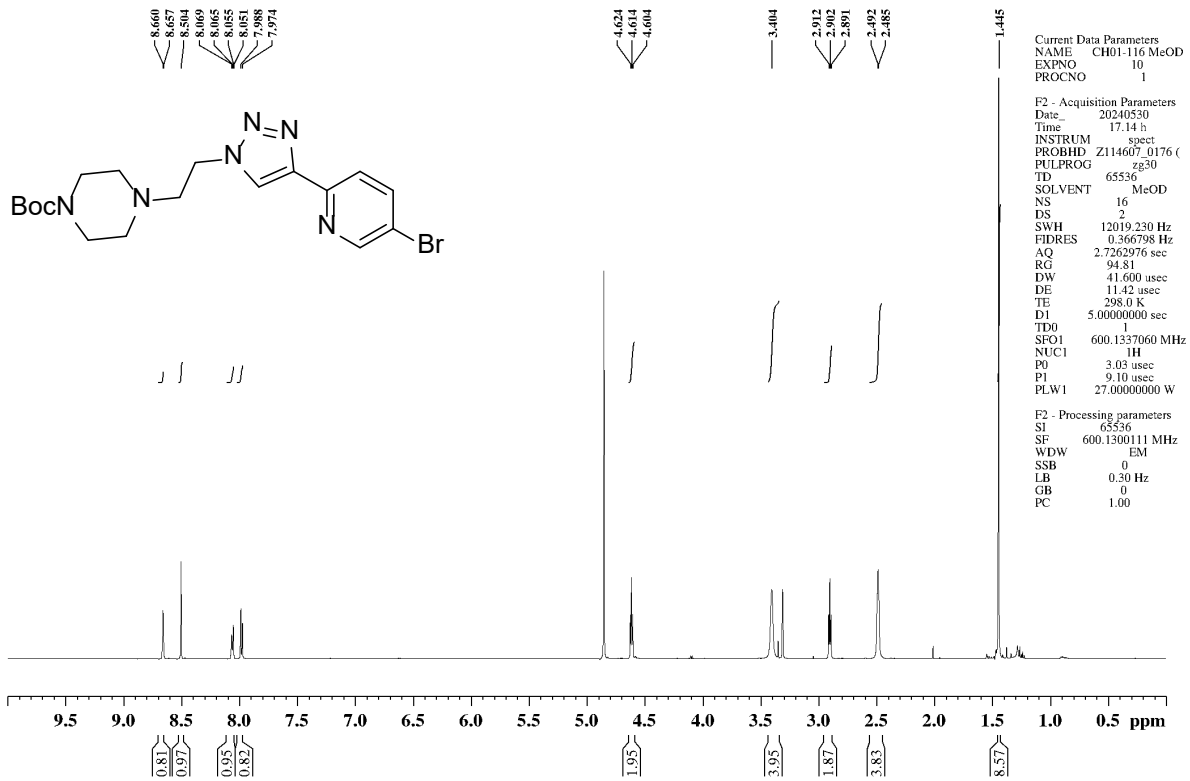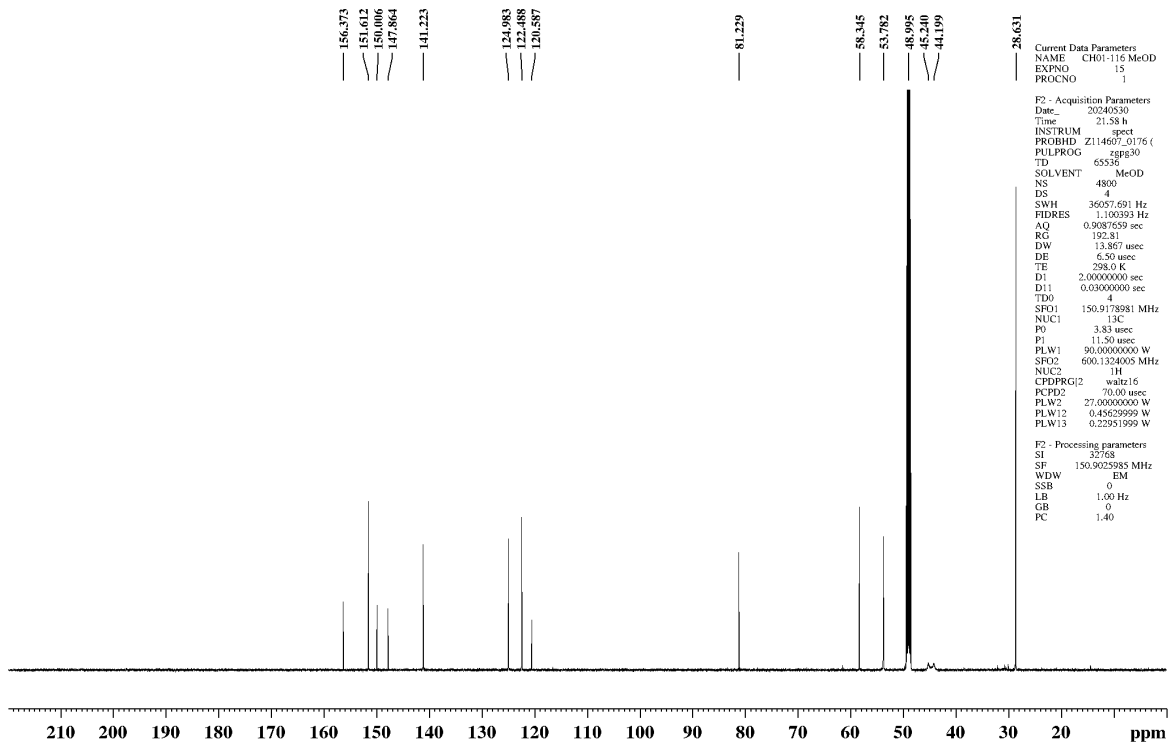

**<sup>1</sup>H and <sup>13</sup>C NMR of 37 (400 MHz, CD<sub>3</sub>OD):**

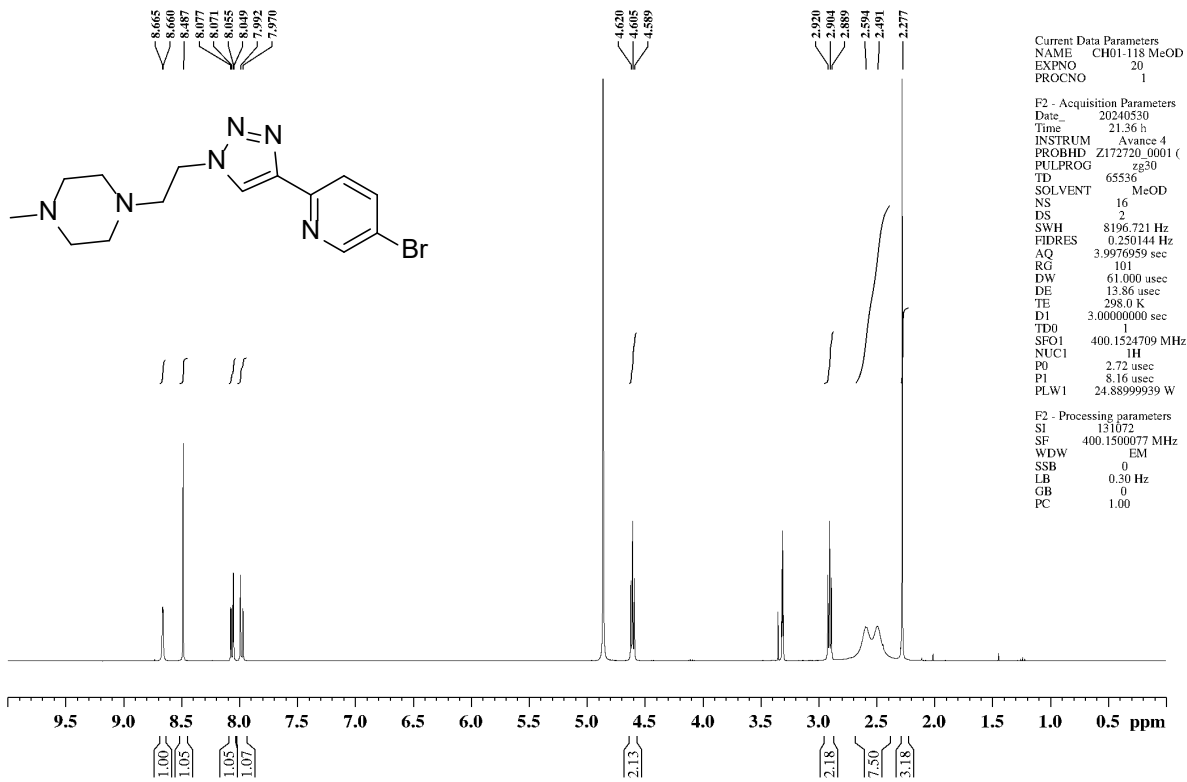

Current Data Parameters  
 NAME CH01-118 MeOD  
 EXPNO 20  
 PROCNO 1

F2 - Acquisition Parameters  
 Date\_ 20240530  
 Time 21.36 h  
 INSTRUM Avance 4  
 PROBHD Z172720\_0001 (Z172720\_0001)  
 PULPROG zg30  
 TD 65536  
 SOLVENT MeOD  
 NS 16  
 DS 2  
 SWH 8196.721 Hz  
 FIDRES 0.250144 Hz  
 AQ 3.9976959 sec  
 RG 101  
 DW 61.000 usec  
 DE 13.86 usec  
 TE 298.0 K  
 D1 3.00000000 sec  
 TD0 1  
 SFO1 400.1524709 MHz  
 NUC1 1H  
 P0 2.72 usec  
 P1 8.16 usec  
 PLW1 24.88999939 W

F2 - Processing parameters  
 SI 131072  
 SF 400.1500077 MHz  
 WDW EM  
 SSB 0  
 LB 0.30 Hz  
 GB 0  
 PC 1.00

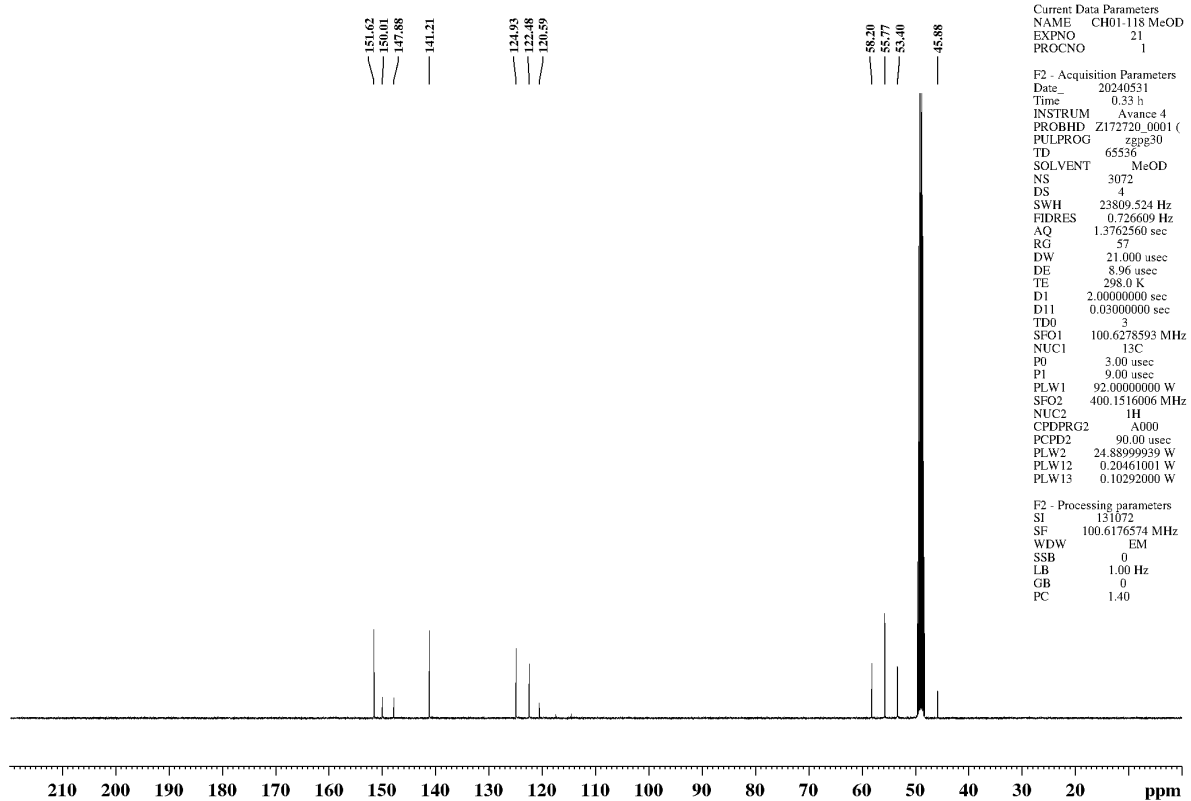

Current Data Parameters  
 NAME CH01-118 MeOD  
 EXPNO 21  
 PROCNO 1

F2 - Acquisition Parameters  
 Date\_ 20240531  
 Time 0.33 h  
 INSTRUM Avance 4  
 PROBHD Z172720\_0001 (Z172720\_0001)  
 PULPROG zgpg30  
 TD 65536  
 SOLVENT MeOD  
 NS 3072  
 DS 4  
 SWH 23809.524 Hz  
 FIDRES 0.726609 Hz  
 AQ 1.3762560 sec  
 RG 57  
 DW 21.000 usec  
 DE 8.96 usec  
 TE 298.0 K  
 D1 2.00000000 sec  
 D11 0.03000000 sec  
 TD0 3  
 SFO1 100.6278593 MHz  
 NUC1 13C  
 P0 3.00 usec  
 P1 9.00 usec  
 PLW1 92.00000000 W  
 SFO2 400.1516006 MHz  
 NUC2 1H  
 CPDPRG2 A000  
 PCPD2 90.00 usec  
 PLW2 24.88999939 W  
 PLW12 0.20461001 W  
 PLW13 0.10292000 W

F2 - Processing parameters  
 SI 131072  
 SF 100.6176574 MHz  
 WDW EM  
 SSB 0  
 LB 1.00 Hz  
 GB 0  
 PC 1.40

**<sup>1</sup>H NMR of 39 (400 MHz, CDCl<sub>3</sub>):**

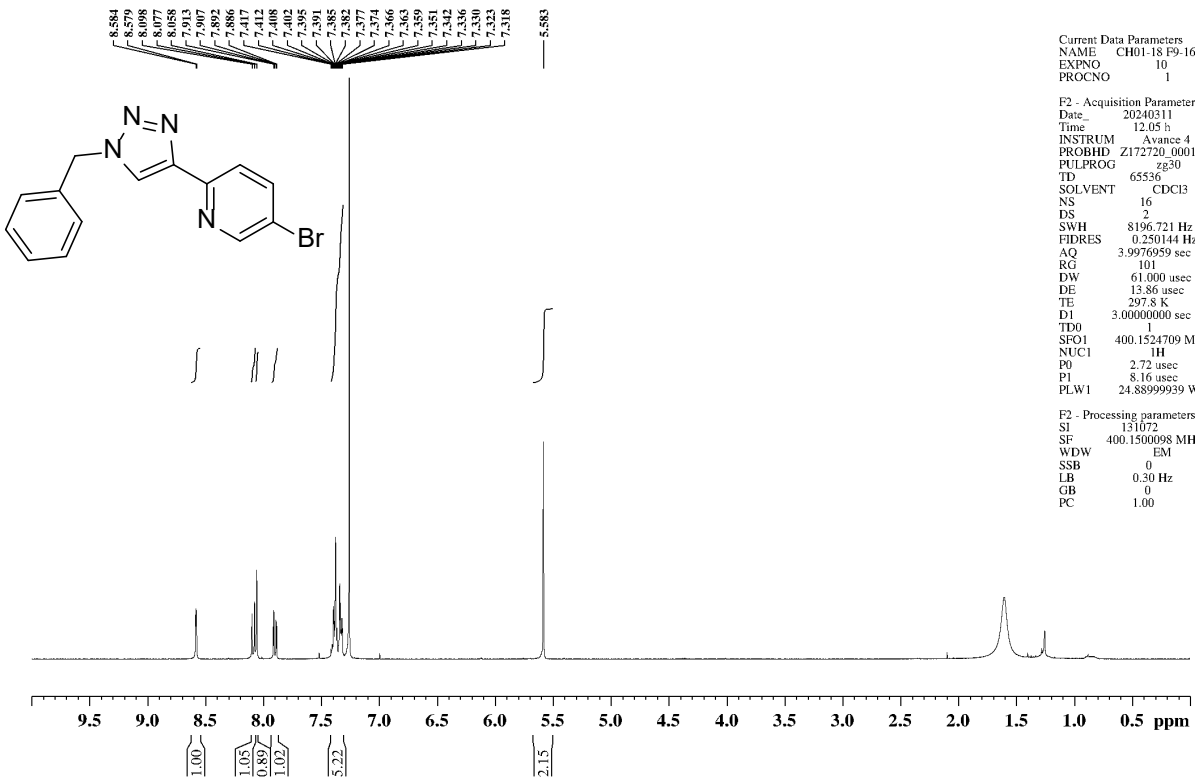

Current Data Parameters  
 NAME CH01-18 F9-16  
 EXPNO 10  
 PROCNO 1

F2 - Acquisition Parameters  
 Date 20240311  
 Time 12.05 h  
 INSTRUM Avance-4  
 PROBHD Z172720\_0001 (Z  
 PULPROG zg30  
 TD 65536  
 SOLVENT CDCl3  
 NS 16  
 DS 2  
 SWH 8196.721 Hz  
 FIDRES 0.250144 Hz  
 AQ 3.9976959 sec  
 RG 101  
 DW 61.000 usec  
 DE 13.86 usec  
 TE 297.8 K  
 DI 3.00000000 sec  
 TDO 1  
 SFO1 400.1524709 MHz  
 NUC1 1H  
 P0 2.72 usec  
 P1 8.16 usec  
 PLW1 24.88999999 W

F2 - Processing parameters  
 SI 131072  
 SF 400.1500098 MHz  
 WDW EM  
 SSB 0  
 LB 0.30 Hz  
 GB 0  
 PC 1.00

**<sup>1</sup>H and <sup>13</sup>C NMR of 40 (400 MHz, DMSO-d<sub>6</sub>):**

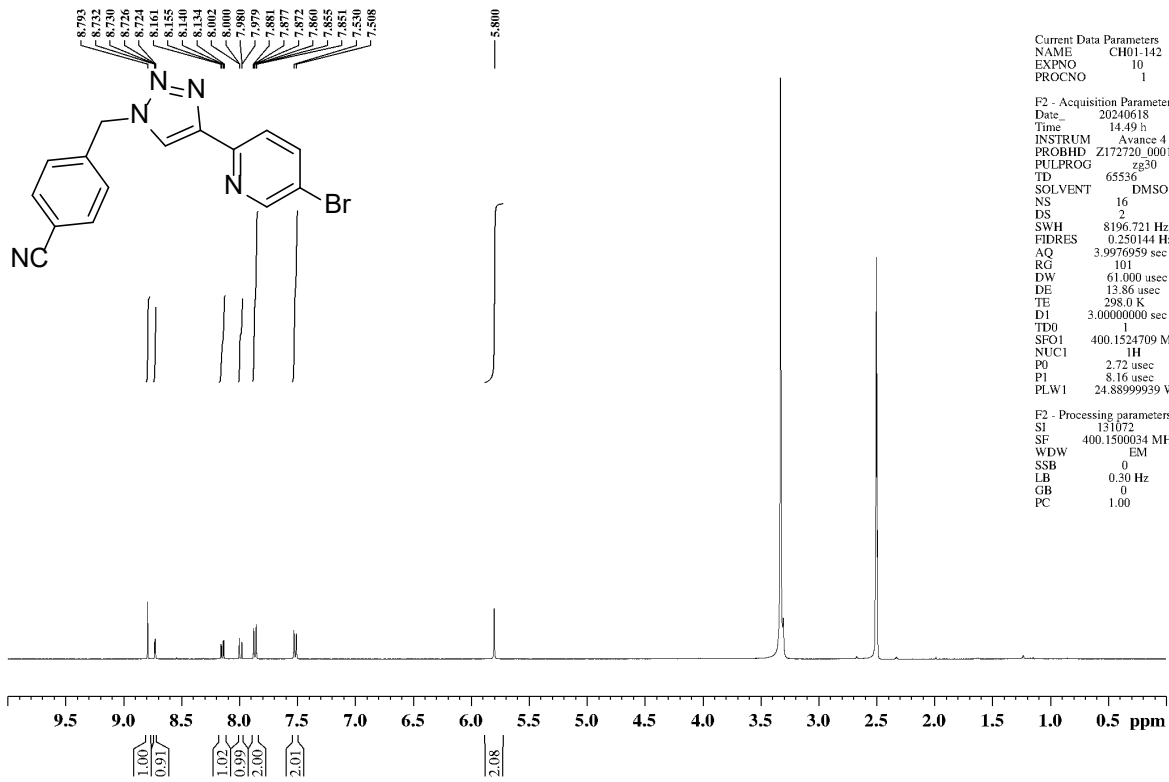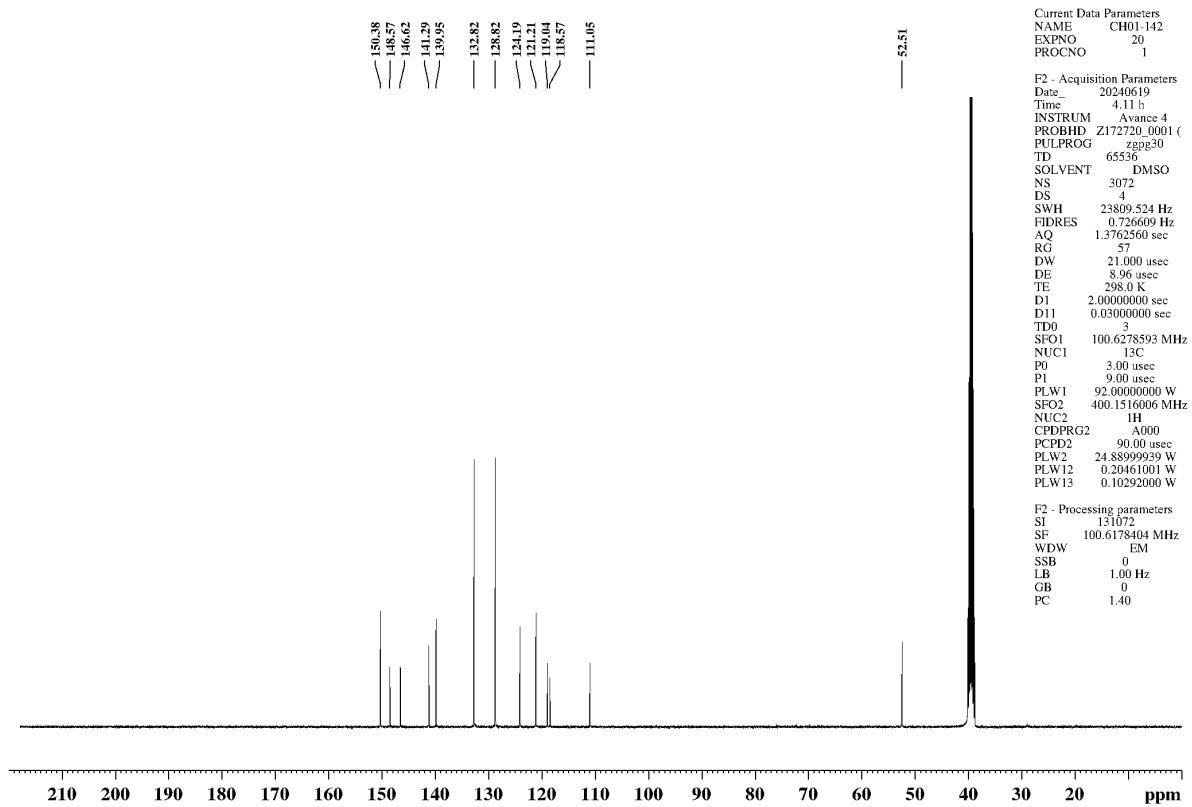

**<sup>1</sup>H and <sup>13</sup>C NMR of 41 (500 MHz, DMSO-d<sub>6</sub>):**

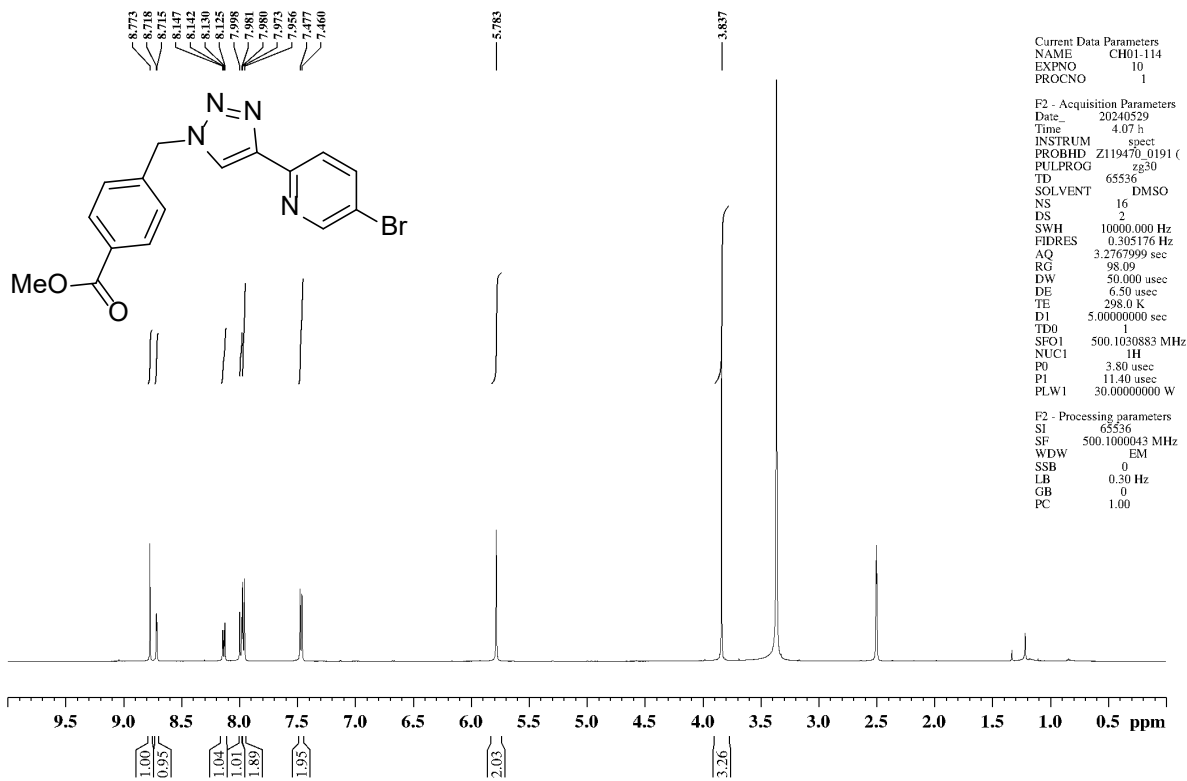

Current Data Parameters  
 NAME CH01-114  
 EXPNO 10  
 PROCNO 1

F2 - Acquisition Parameters  
 Date\_ 20240529  
 Time 4.07 h  
 INSTRUM spect  
 PROBHD Z119470\_0191 ( )  
 PULPROG zg30  
 TD 65536  
 SOLVENT DMSO  
 NS 16  
 DS 2  
 SWH 10000.000 Hz  
 FIDRES 0.305176 Hz  
 AQ 3.2767999 sec  
 RG 98.09  
 DW 50.000 usec  
 DE 6.50 usec  
 TE 298.0 K  
 D1 5.0000000 sec  
 TD0 1  
 SFO1 500.1030883 MHz  
 NUC1 1H  
 P0 3.80 usec  
 P1 11.40 usec  
 PLW1 30.00000000 W

F2 - Processing parameters  
 SI 65536  
 SF 500.1000043 MHz  
 WDW EM  
 SSB 0  
 LB 0.30 Hz  
 GB 0  
 PC 1.00

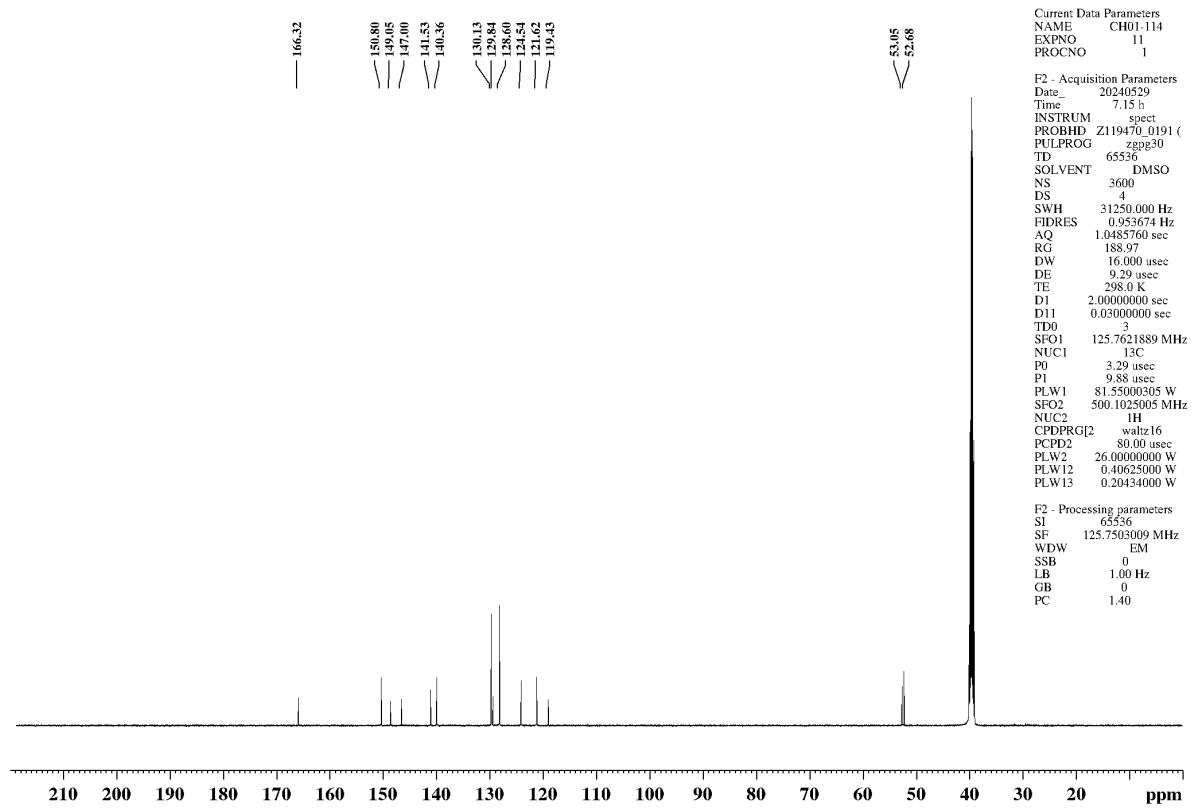

Current Data Parameters  
 NAME CH01-114  
 EXPNO 11  
 PROCNO 1

F2 - Acquisition Parameters  
 Date\_ 20240529  
 Time 7.15 h  
 INSTRUM spect  
 PROBHD Z119470\_0191 ( )  
 PULPROG zgpg30  
 TD 65536  
 SOLVENT DMSO  
 NS 3600  
 DS 4  
 SWH 31250.000 Hz  
 FIDRES 0.953674 Hz  
 AQ 1.0485760 sec  
 RG 188.97  
 DW 16.000 usec  
 DE 9.29 usec  
 TE 298.0 K  
 D1 2.0000000 sec  
 D11 0.03000000 sec  
 TD0 3  
 SFO1 125.7621889 MHz  
 NUC1 13C  
 P0 3.29 usec  
 P1 9.88 usec  
 PLW1 81.55000005 W  
 SFO2 500.1025005 MHz  
 NUC2 1H  
 CPDPRG2 walz16  
 PCPD2 80.00 usec  
 PLW2 26.00000000 W  
 PLW12 0.40625000 W  
 PLW13 0.20434000 W

F2 - Processing parameters  
 SI 65536  
 SF 125.7503009 MHz  
 WDW EM  
 SSB 0  
 LB 1.00 Hz  
 GB 0  
 PC 1.40

**<sup>1</sup>H and <sup>13</sup>C NMR of 42 (400 MHz, CDCl<sub>3</sub>):**

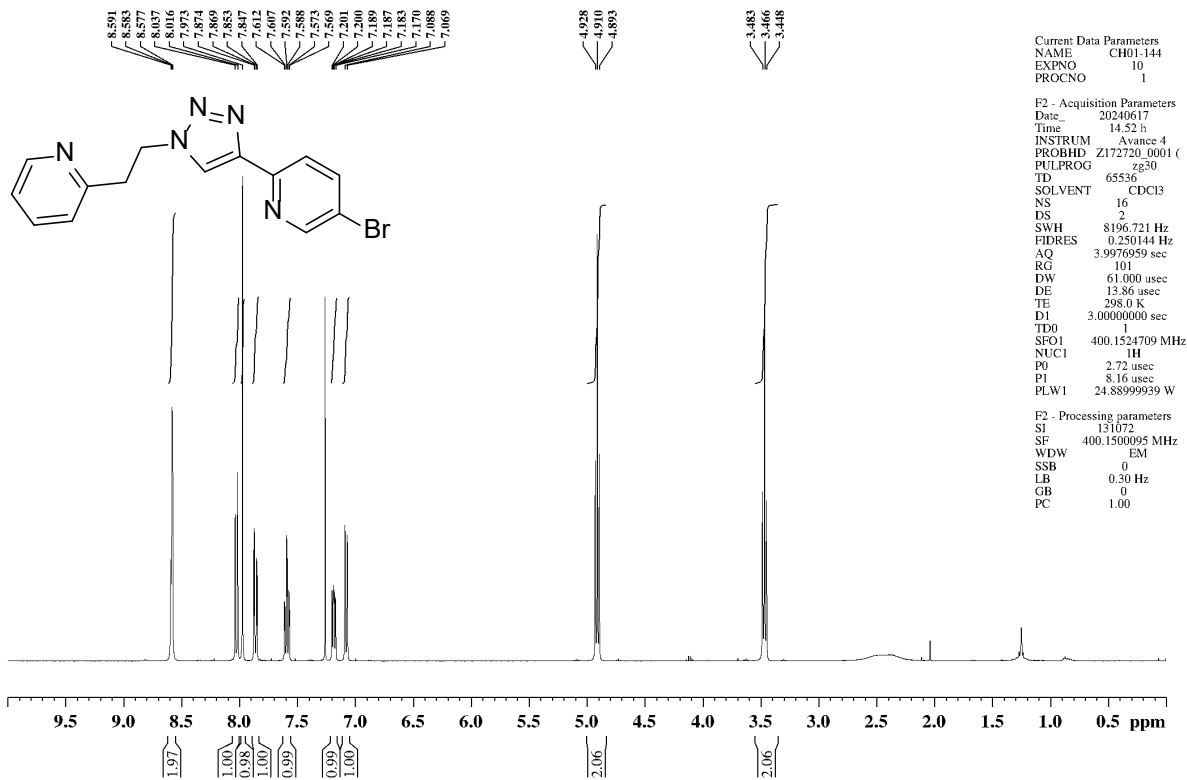

Current Data Parameters  
 NAME CH01-144  
 EXPNO 10  
 PROCNO 1

F2 - Acquisition Parameters  
 Date\_ 20240617  
 Time 14.52 h  
 INSTRUM Avance 4  
 PROBHD Z172720\_0001 ( )  
 PULPROG zg30  
 TD 65536  
 SOLVENT CDCl3  
 NS 16  
 DS 2  
 SWH 8196.721 Hz  
 FIDRES 0.250144 Hz  
 AQ 3.9976959 sec  
 RG 101  
 DW 61.000 usec  
 DE 13.86 usec  
 TE 298.0 K  
 D1 3.00000000 sec  
 TD0  
 SFO1 400.1524709 MHz  
 NUC1 <sup>1</sup>H  
 P0 2.72 usec  
 PL 8.16 usec  
 PLW1 24.88999939 W

F2 - Processing parameters  
 SI 131072  
 SF 400.1500095 MHz  
 WDW EM  
 SSB 0  
 LB 0.30 Hz  
 GB 9  
 PC 1.00

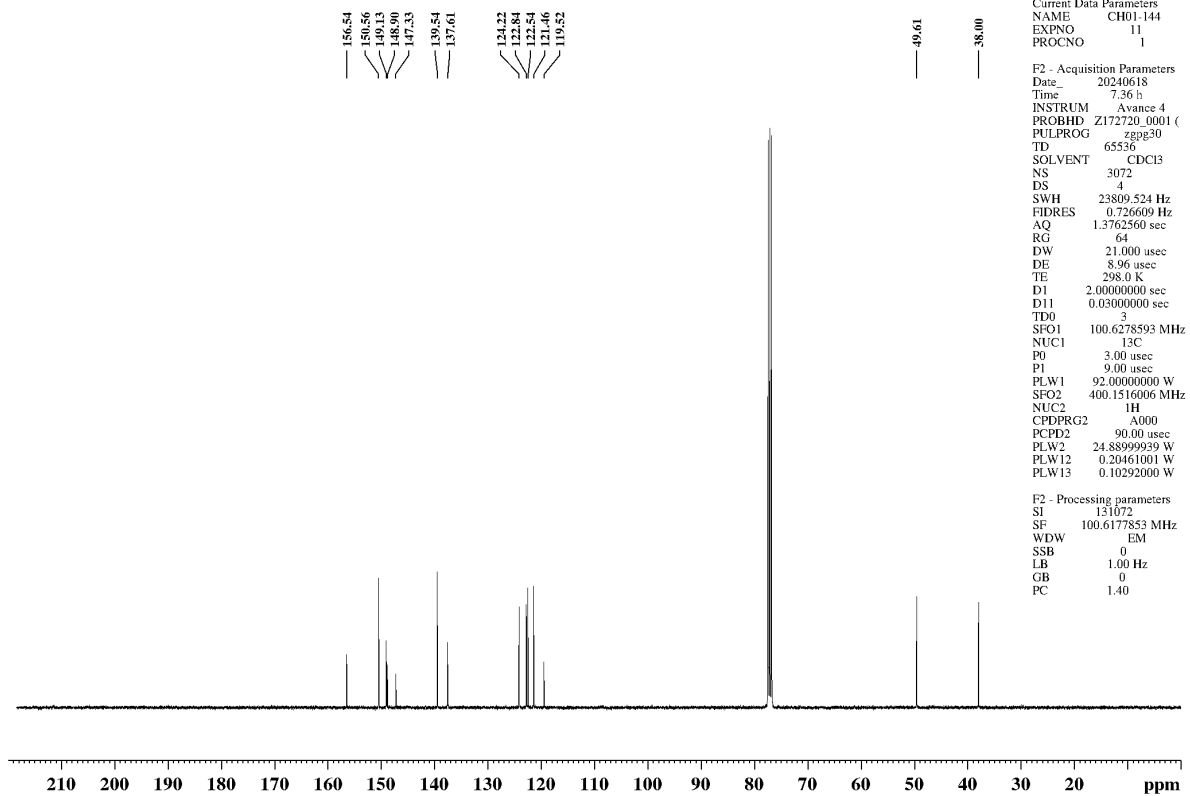

Current Data Parameters  
 NAME CH01-144  
 EXPNO 11  
 PROCNO 1

F2 - Acquisition Parameters  
 Date\_ 20240618  
 Time 7.26 h  
 INSTRUM Avance 4  
 PROBHD Z172720\_0001 ( )  
 PULPROG zgpg30  
 TD 65536  
 SOLVENT CDCl3  
 NS 3072  
 DS 4  
 SWH 23809.524 Hz  
 FIDRES 0.726609 Hz  
 AQ 1.3762560 sec  
 RG 64  
 DW 21.000 usec  
 DE 8.96 usec  
 TE 298.0 K  
 D1 2.00000000 sec  
 D11 0.03000000 sec  
 TD0  
 SFO1 100.6278593 MHz  
 NUC1 <sup>13</sup>C  
 P0 3.00 usec  
 PL 9.00 usec  
 PLW1 92.00000000 W  
 SFO2 400.1516006 MHz  
 NUC2 <sup>1</sup>H  
 CPDPRG2 A000  
 PCPD2 90.00 usec  
 PLW2 24.88999939 W  
 PLW12 0.20461001 W  
 PLW13 0.10292000 W

F2 - Processing parameters  
 SI 131072  
 SF 100.6177853 MHz  
 WDW EM  
 SSB 0  
 LB 1.00 Hz  
 GB 0  
 PC 1.40

**<sup>1</sup>H and <sup>13</sup>C NMR of 43 (400 MHz, (CD<sub>3</sub>)<sub>2</sub>CO):**

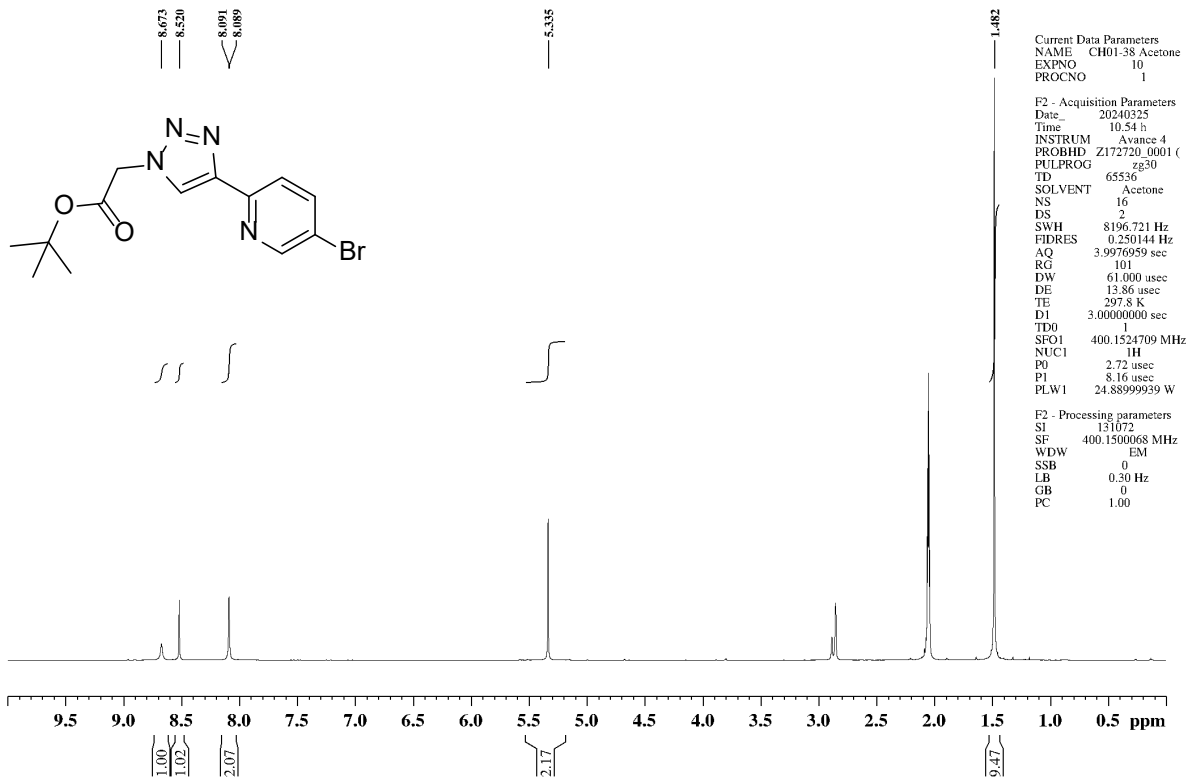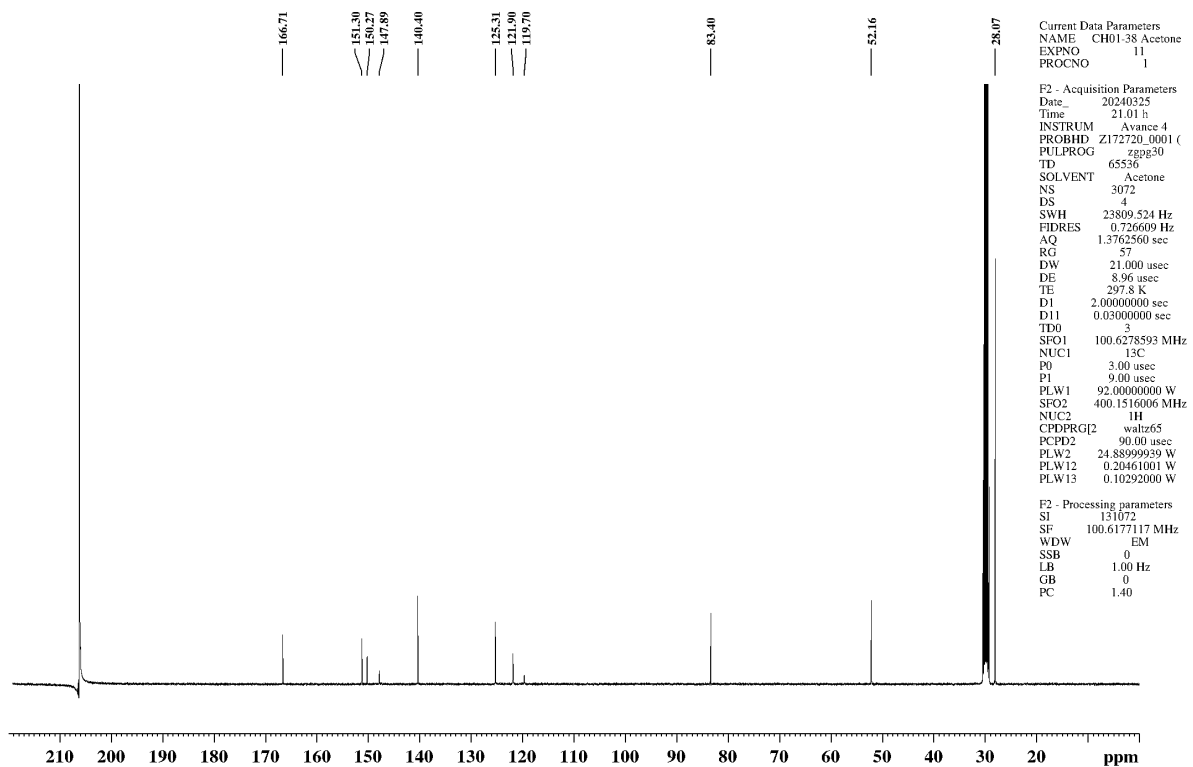

**<sup>1</sup>H and <sup>13</sup>C NMR of 44 (600 MHz, DMSO-d<sub>6</sub>):**

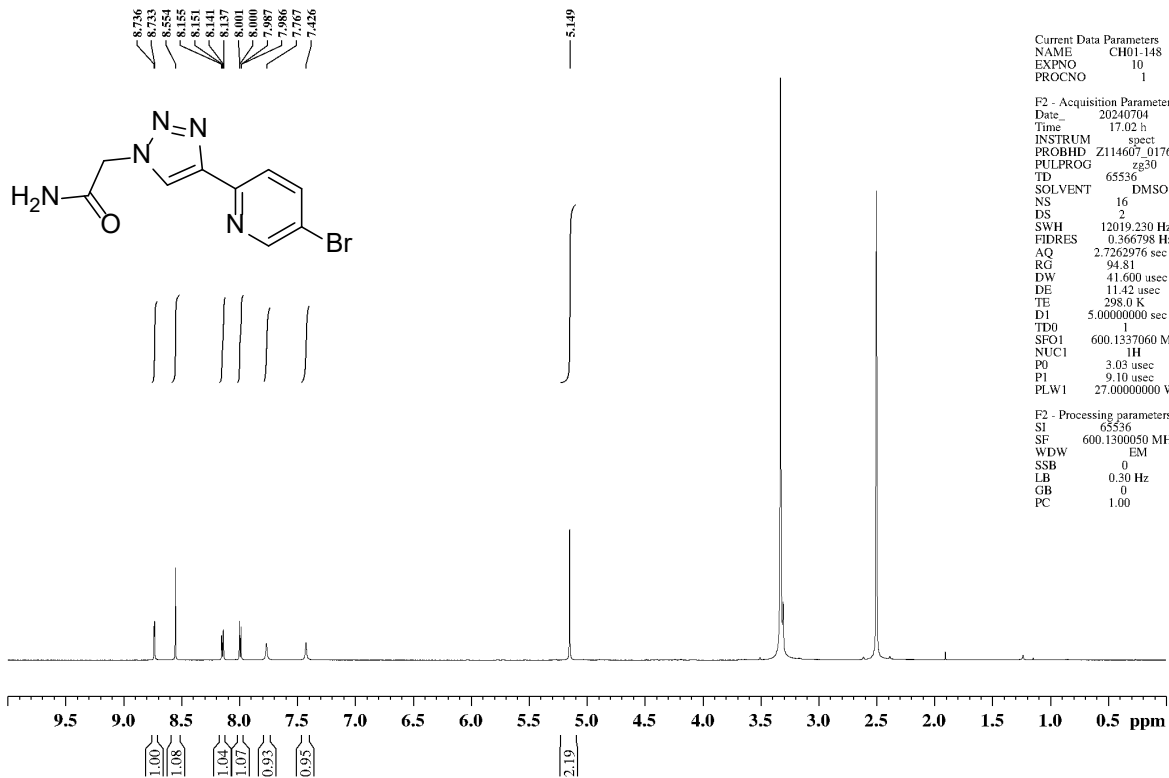

Current Data Parameters  
 NAME CH01-148  
 EXPNO 10  
 PROCNO 1

F2 - Acquisition Parameters  
 Date\_ 20240704  
 Time 17.02 h  
 INSTRUM spect  
 PROBHD Z114607\_0176 ( )  
 PULPROG zg30  
 TD 65536  
 SOLVENT DMSO  
 NS 16  
 DS 2  
 SWH 12019.230 Hz  
 FIDRES 0.366798 Hz  
 AQ 2.7262976 sec  
 RG 94.81  
 DW 41.600 usec  
 DE 11.42 usec  
 TE 298.0 K  
 D1 5.00000000 sec  
 TD0 1  
 SFO1 600.1337060 MHz  
 NUC1 <sup>1</sup>H  
 P0 3.03 usec  
 P1 9.10 usec  
 PLW1 27.00000000 W

F2 - Processing parameters  
 SI 65536  
 SF 600.1330050 MHz  
 WDW EM  
 SSB 0  
 LB 0.30 Hz  
 GB 0  
 PC 1.00

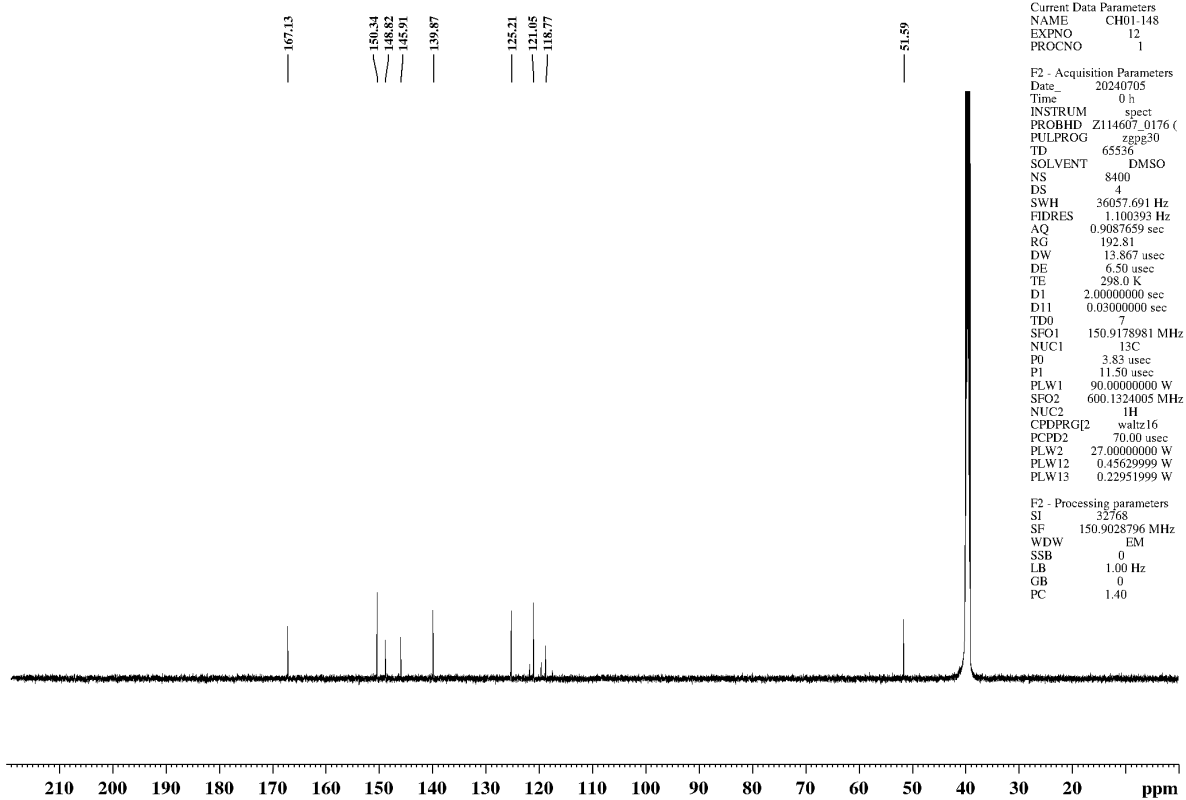

Current Data Parameters  
 NAME CH01-148  
 EXPNO 12  
 PROCNO 1

F2 - Acquisition Parameters  
 Date\_ 20240705  
 Time 0 h  
 INSTRUM spect  
 PROBHD Z114607\_0176 ( )  
 PULPROG zgpg30  
 TD 65536  
 SOLVENT DMSO  
 NS 8400  
 DS 4  
 SWH 36057.691 Hz  
 FIDRES 1.100393 Hz  
 AQ 0.9087659 sec  
 RG 192.81  
 DW 13.867 usec  
 DE 6.50 usec  
 TE 298.0 K  
 D1 2.00000000 sec  
 D11 0.03000000 sec  
 TD0 7  
 SFO1 150.9178981 MHz  
 NUC1 <sup>13</sup>C  
 P0 3.83 usec  
 P1 11.50 usec  
 PLW1 90.00000000 W  
 SFO2 600.1324005 MHz  
 NUC2 <sup>1</sup>H  
 CPDPRG2 walz16  
 PCPD2 70.00 usec  
 PLW2 27.00000000 W  
 PLW12 0.45629999 W  
 PLW13 0.22951999 W

F2 - Processing parameters  
 SI 32768  
 SF 150.9028796 MHz  
 WDW EM  
 SSB 0  
 LB 1.00 Hz  
 GB 0  
 PC 1.40

**<sup>1</sup>H and <sup>13</sup>C NMR of 45 (600 MHz, DMSO-d<sub>6</sub>):**

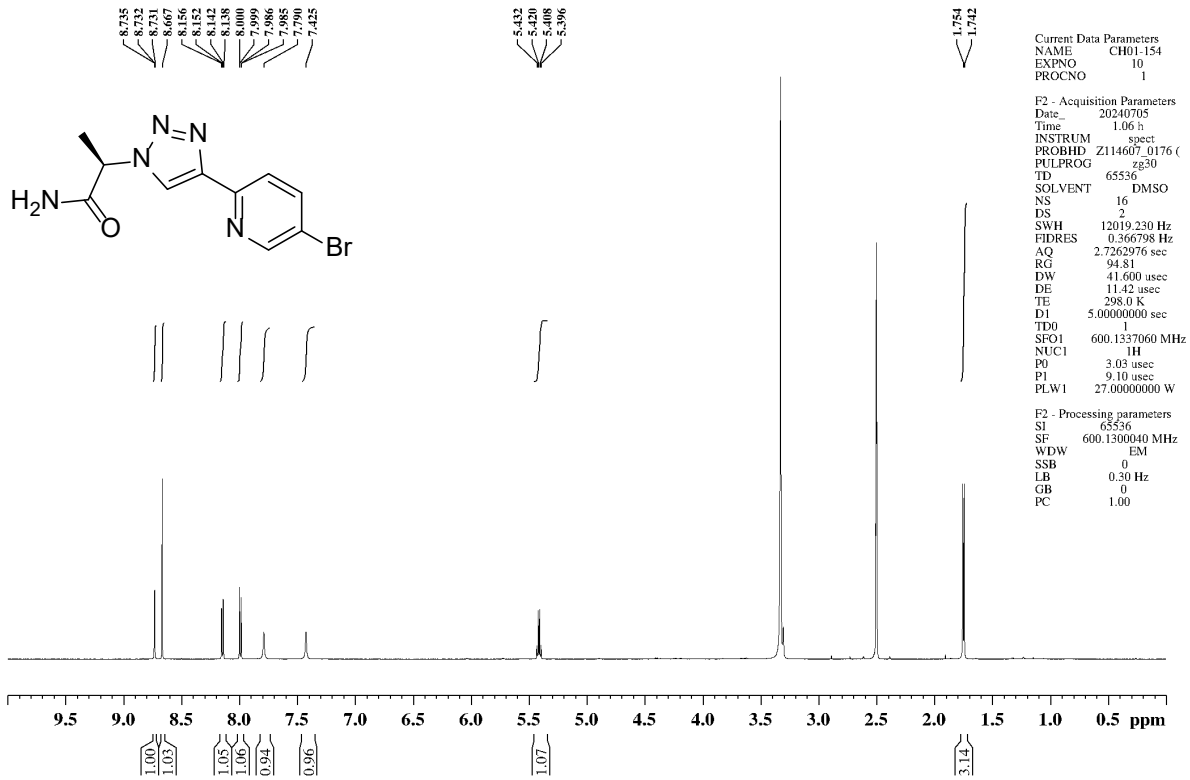

Current Data Parameters  
 NAME CH01-154  
 EXPNO 10  
 PROCNO 1

F2 - Acquisition Parameters  
 Date\_ 20240705  
 Time 1.06 h  
 INSTRUM spect  
 PROBHD Z114607.0176 ( )  
 PULPROG zg30  
 TD 65536  
 SOLVENT DMSO  
 NS 16  
 DS 2  
 SWH 12019.230 Hz  
 FIDRES 0.366798 Hz  
 AQ 2.7262976 sec  
 RG 94.81  
 DW 41.600 usec  
 DE 11.42 usec  
 TE 298.0 K  
 D1 5.00000000 sec  
 TD0 1  
 SFO1 600.1337060 MHz  
 NUC1 <sup>1</sup>H  
 P0 3.03 usec  
 P1 9.10 usec  
 PLW1 27.00000000 W

F2 - Processing parameters  
 SI 65536  
 SF 600.1300040 MHz  
 WDW EM  
 SSB 0  
 LB 0.30 Hz  
 GB 0  
 PC 1.00

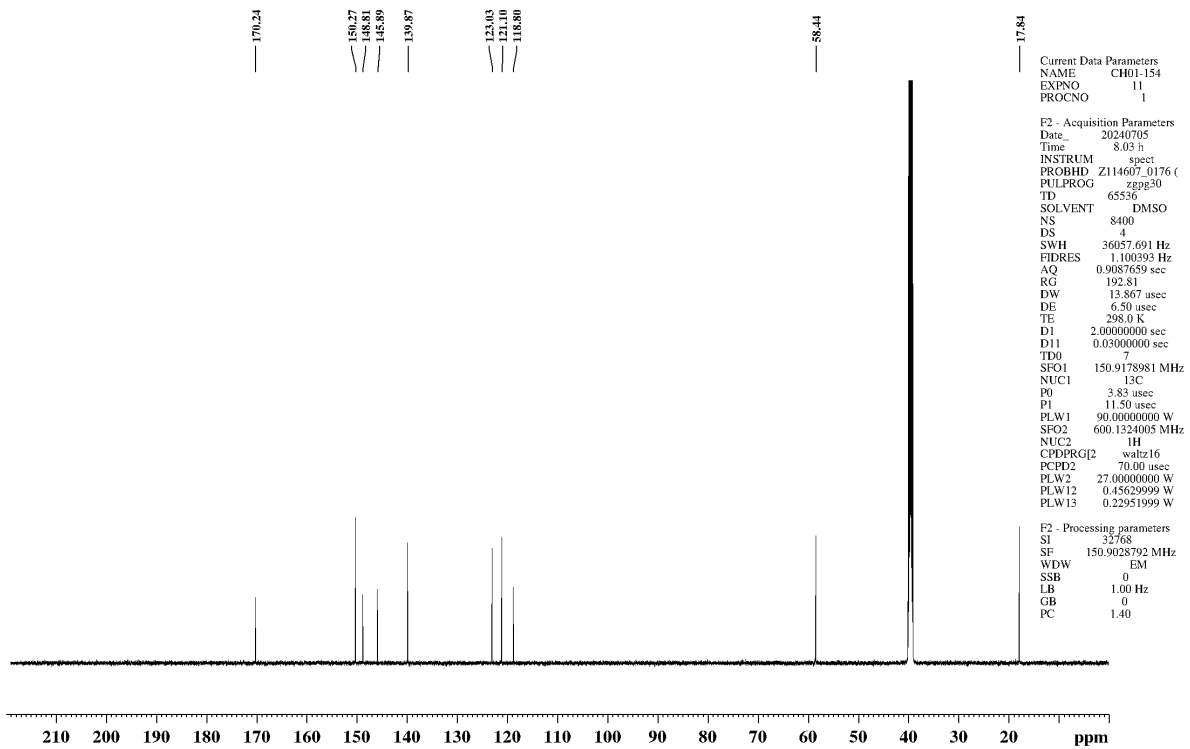

Current Data Parameters  
 NAME CH01-154  
 EXPNO 11  
 PROCNO 1

F2 - Acquisition Parameters  
 Date\_ 20240705  
 Time 8.03 h  
 INSTRUM spect  
 PROBHD Z114607.0176 ( )  
 PULPROG zgpg30  
 TD 65536  
 SOLVENT DMSO  
 NS 8400  
 DS 4  
 SWH 36057.691 Hz  
 FIDRES 1.100393 Hz  
 AQ 0.9087659 sec  
 RG 192.81  
 DW 13.867 usec  
 DE 6.50 usec  
 TE 298.0 K  
 D1 2.00000000 sec  
 D11 0.03000000 sec  
 TD0 7  
 SFO1 150.9178981 MHz  
 NUC1 <sup>13</sup>C  
 P0 3.83 usec  
 P1 11.50 usec  
 PLW1 90.00000000 W  
 SFO2 600.1324005 MHz  
 NUC2 <sup>1</sup>H  
 CPDPRG2 waltz16  
 PCPD2 70.00 usec  
 PLW2 27.00000000 W  
 PLW12 0.45629999 W  
 PLW13 0.22951999 W

F2 - Processing parameters  
 SI 33768  
 SF 150.9028792 MHz  
 WDW EM  
 SSB 0  
 LB 1.00 Hz  
 GB 0  
 PC 1.40

**<sup>1</sup>H and <sup>13</sup>C NMR of 46 (600 MHz, DMSO-d<sub>6</sub>):**

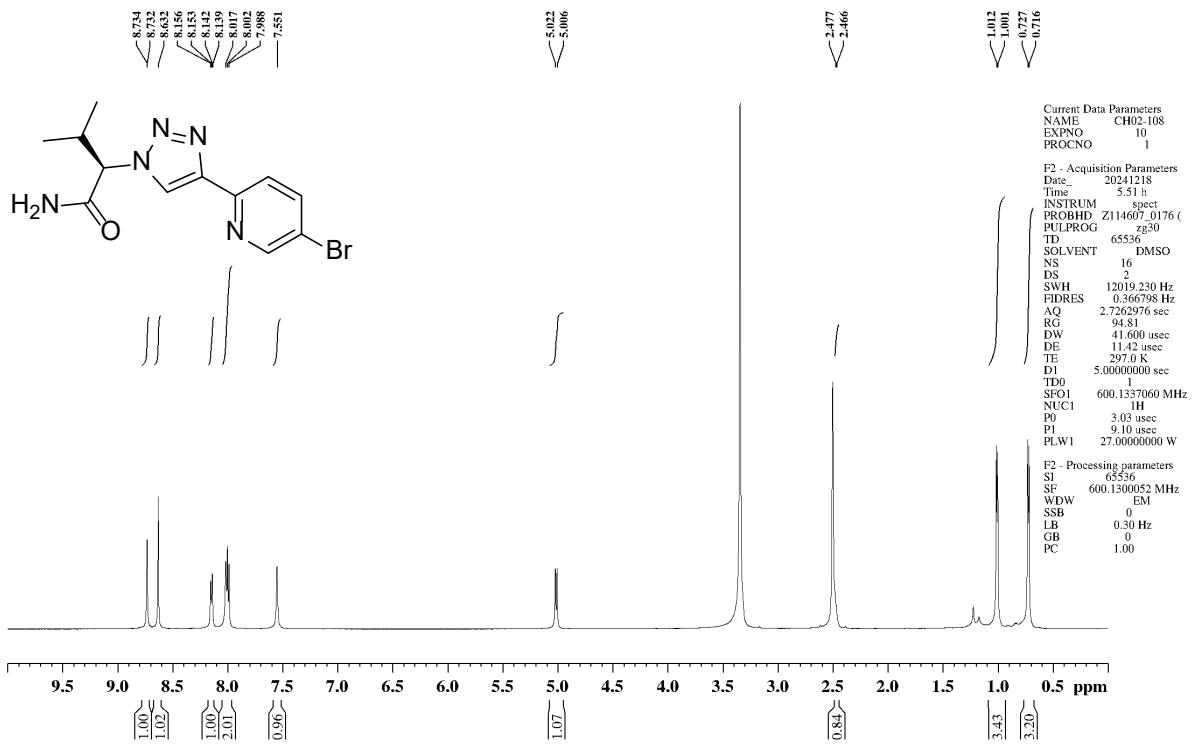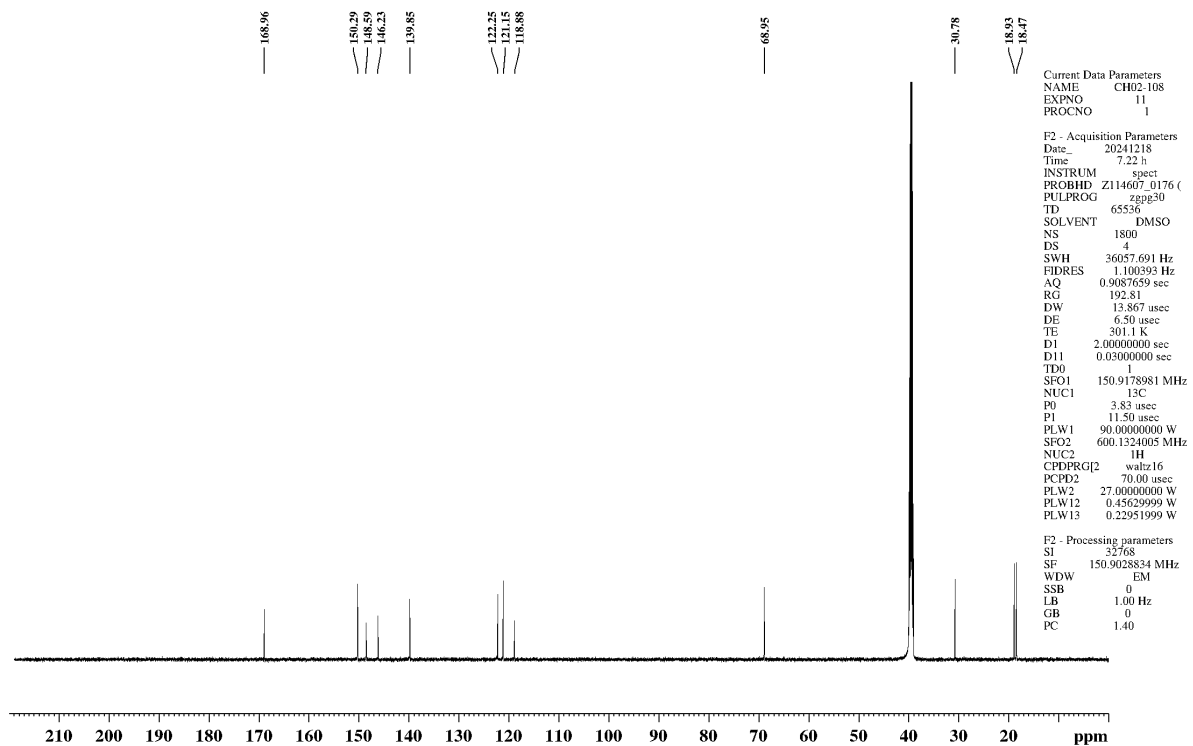

**<sup>1</sup>H and <sup>13</sup>C NMR of 47 (600 MHz, DMSO-d<sub>6</sub>):**

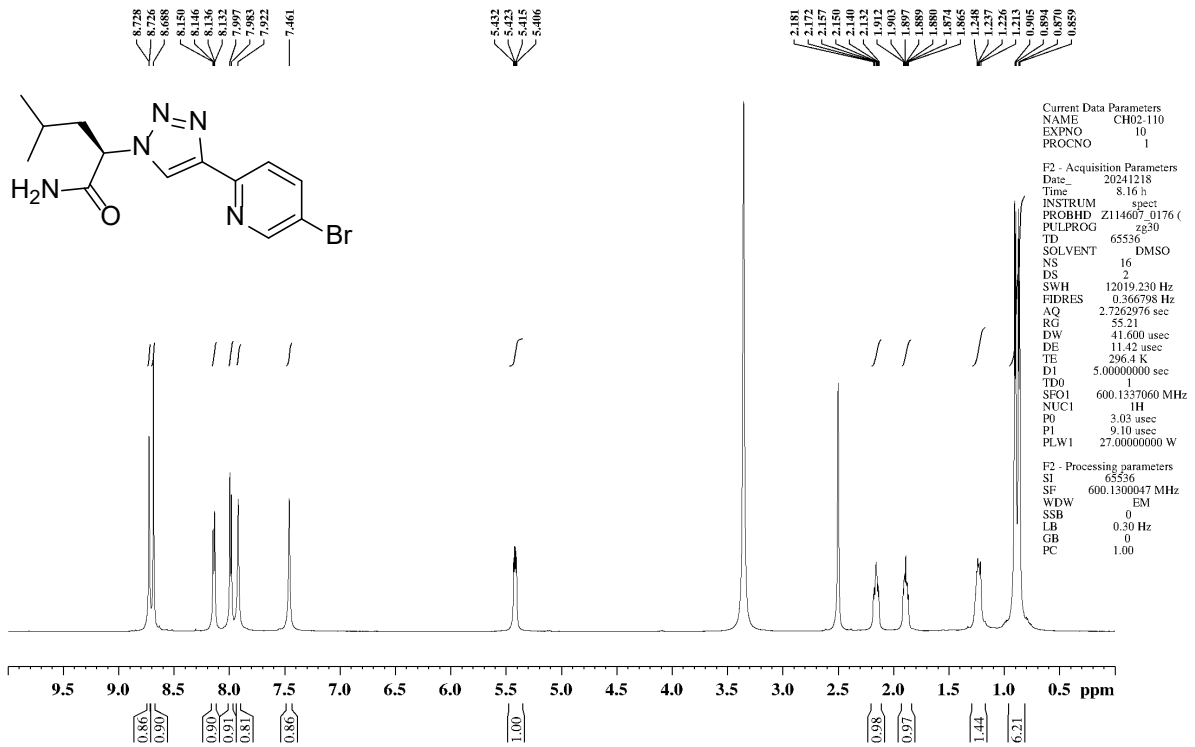

Current Data Parameters  
 NAME CH02-110  
 EXPNO 10  
 PROCNO 1

F2 - Acquisition Parameters  
 Date\_ 20241218  
 Time 8.16 h  
 INSTRUM spect  
 PROBHD Z114607\_0176 ( )  
 PULPROG zg30  
 TD 65536  
 SOLVENT DMSO  
 NS 16  
 DS 2  
 SWH 12019.230 Hz  
 FIDRES 0.366798 Hz  
 AQ 2.7262976 sec  
 RG 55.21  
 DW 41.600 usec  
 DE 11.42 usec  
 TE 296.4 K  
 D1 5.00000000 sec  
 TD0 1  
 SFO1 600.1337060 MHz  
 NUC1 <sup>1</sup>H  
 P0 3.03 usec  
 P1 9.10 usec  
 PLW1 27.00000000 W

F2 - Processing parameters  
 SI 65536  
 SF 600.1300047 MHz  
 WDW EM  
 SSB 0  
 LB 0.30 Hz  
 GB 0  
 PC 1.00

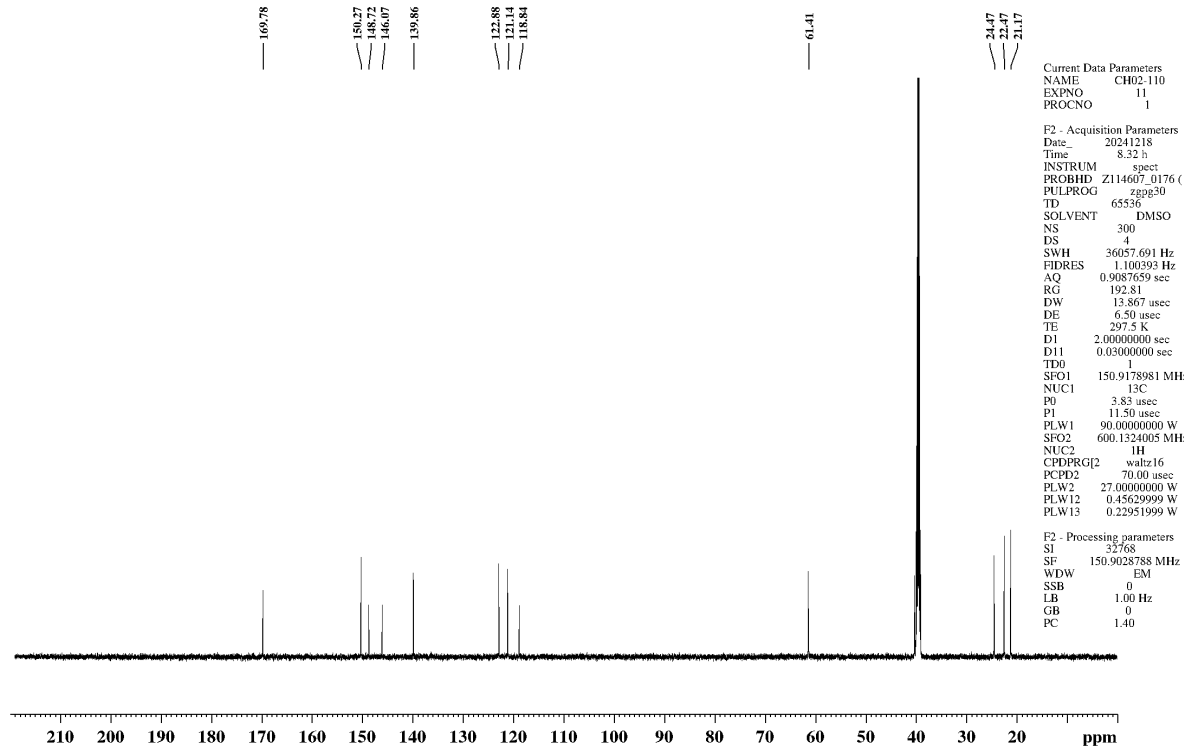

Current Data Parameters  
 NAME CH02-110  
 EXPNO 11  
 PROCNO 1

F2 - Acquisition Parameters  
 Date\_ 20241218  
 Time 8.52 h  
 INSTRUM spect  
 PROBHD Z114607\_0176 ( )  
 PULPROG zg30  
 TD 65536  
 SOLVENT DMSO  
 NS 300  
 DS 4  
 SWH 36057.691 Hz  
 FIDRES 1.100393 Hz  
 AQ 0.9087659 sec  
 RG 192.81  
 DW 13.867 usec  
 DE 6.50 usec  
 TE 297.5 K  
 D1 2.00000000 sec  
 D11 0.05000000 sec  
 TD0 1  
 SFO1 150.9178981 MHz  
 NUC1 <sup>13</sup>C  
 P0 3.83 usec  
 P1 11.50 usec  
 PLW1 90.00000000 W  
 SFO2 600.1324005 MHz  
 NUC2 <sup>1</sup>H  
 CPDPRG2 waltz16  
 PCPD2 70.00 usec  
 PLW2 27.00000000 W  
 PLW12 0.45629999 W  
 PLW13 0.22951999 W

F2 - Processing parameters  
 SI 32768  
 SF 150.9028788 MHz  
 WDW EM  
 SSB 0  
 LB 1.00 Hz  
 GB 0  
 PC 1.40

**<sup>1</sup>H and <sup>13</sup>C NMR of 48 (500 MHz, DMSO-d<sub>6</sub>):**

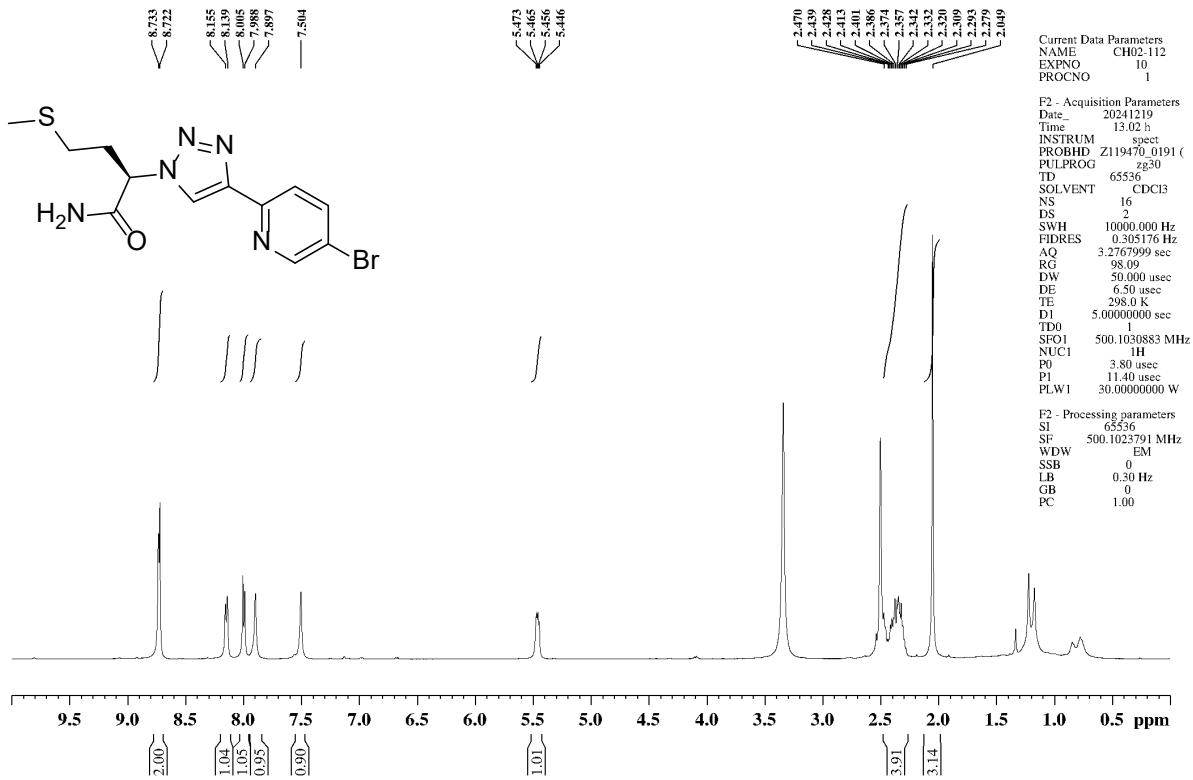

Current Data Parameters  
 NAME: CH02-112  
 EXPNO: 10  
 PROCNO: 1

F2 - Acquisition Parameters  
 Date\_: 20241219  
 Time: 13.02 h  
 INSTRUM: spect  
 PROBHD: Z119470\_0191 ( )  
 PULPROG: zg30  
 TD: 65536  
 SOLVENT: CDCl3  
 NS: 16  
 DS: 2  
 SWH: 10000.000 Hz  
 FIDRES: 0.305176 Hz  
 AQ: 3.2767999 sec  
 RG: 98.09  
 DW: 50.000 usec  
 DE: 6.50 usec  
 TE: 298.0 K  
 D1: 5.0000000 sec  
 TD0: 1  
 SFO1: 500.1030883 MHz  
 NUC1: <sup>1</sup>H  
 P0: 3.80 usec  
 P1: 11.40 usec  
 PLW1: 30.0000000 W

F2 - Processing parameters  
 SI: 65536  
 SF: 500.1023791 MHz  
 WDW: EM  
 SSB: 0  
 LB: 0.30 Hz  
 GB: 0  
 PC: 1.00

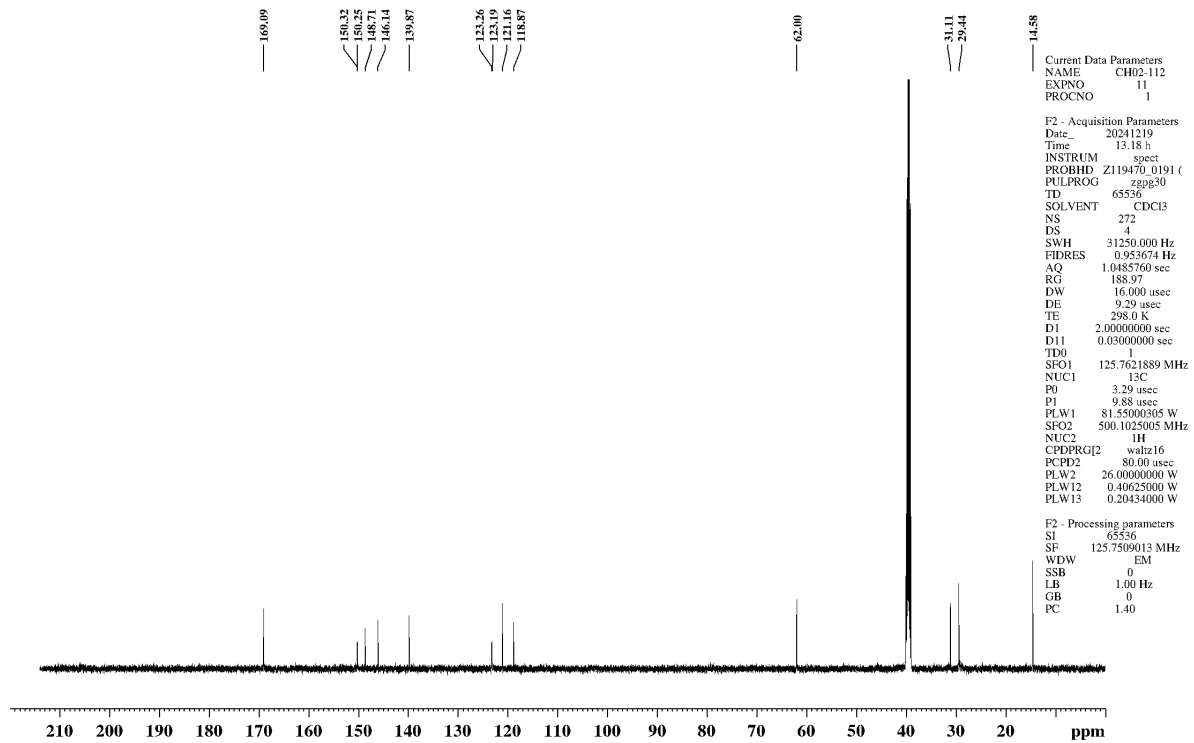

Current Data Parameters  
 NAME: CH02-112  
 EXPNO: 11  
 PROCNO: 1

F2 - Acquisition Parameters  
 Date\_: 20241219  
 Time: 13.18 h  
 INSTRUM: spect  
 PROBHD: Z119470\_0191 ( )  
 PULPROG: zgpg30  
 TD: 65536  
 SOLVENT: CDCl3  
 NS: 272  
 DS: 4  
 SWH: 31250.000 Hz  
 FIDRES: 0.953674 Hz  
 AQ: 1.0485760 sec  
 RG: 188.97  
 DW: 16.000 usec  
 DE: 9.29 usec  
 TE: 298.0 K  
 D1: 2.0000000 sec  
 D11: 0.0300000 sec  
 TD0: 1  
 SFO1: 125.7621889 MHz  
 NUC1: <sup>13</sup>C  
 P0: 3.29 usec  
 P1: 9.88 usec  
 PLW1: 81.55000305 W  
 SFO2: 500.1025005 MHz  
 NUC2: <sup>1</sup>H  
 CPDPRG2: waltz16  
 PCPD2: 80.00 usec  
 PLW2: 26.00000000 W  
 PLW12: 0.40625000 W  
 PLW13: 0.20434000 W

F2 - Processing parameters  
 SI: 65536  
 SF: 125.7309013 MHz  
 WDW: EM  
 SSB: 0  
 LB: 1.00 Hz  
 GB: 0  
 PC: 1.40

**<sup>1</sup>H and <sup>13</sup>C NMR of 49 (600 MHz, DMSO-d<sub>6</sub>):**

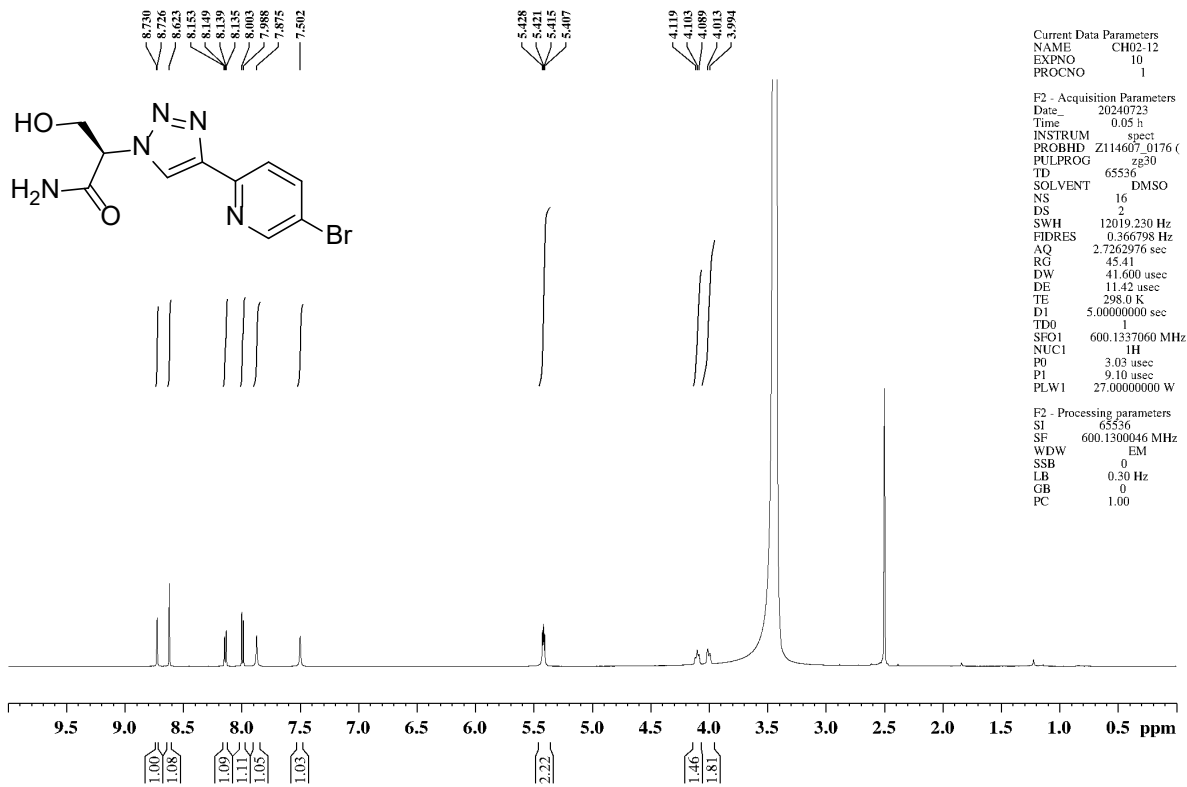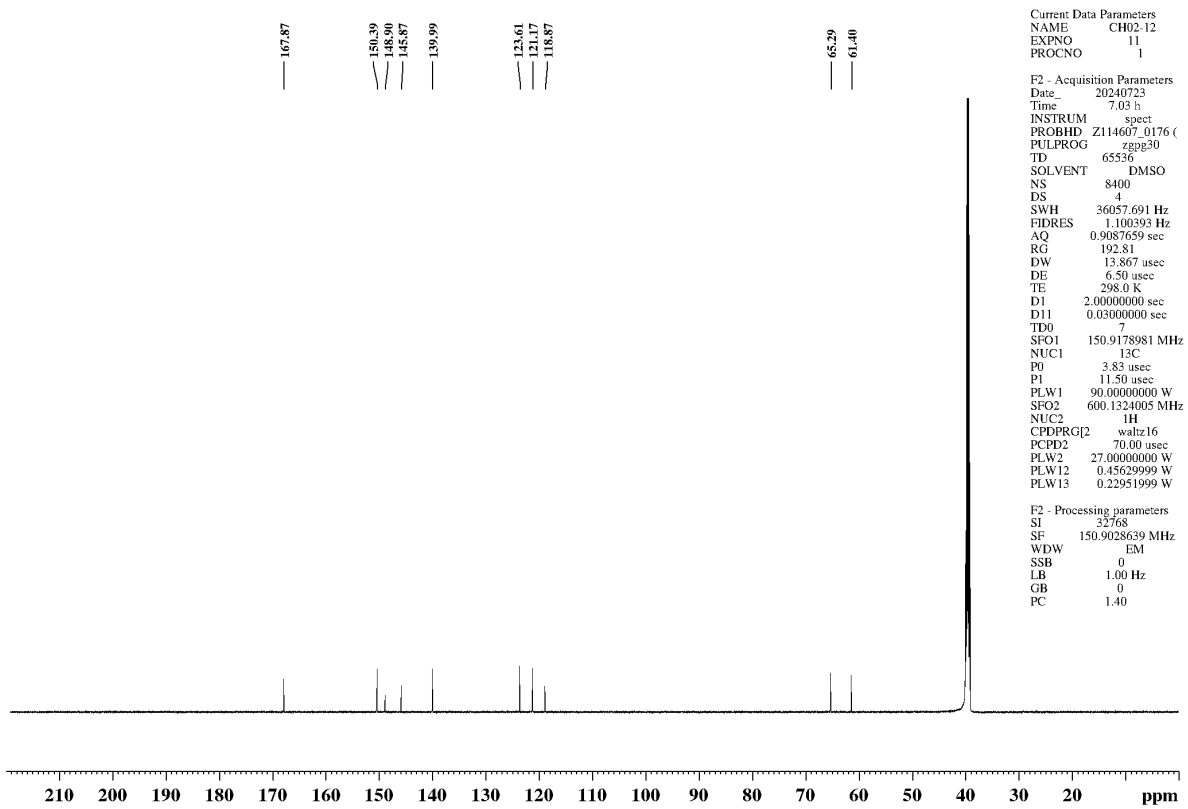

**<sup>1</sup>H and <sup>13</sup>C NMR of 50 (400 MHz, CDCl<sub>3</sub>):**

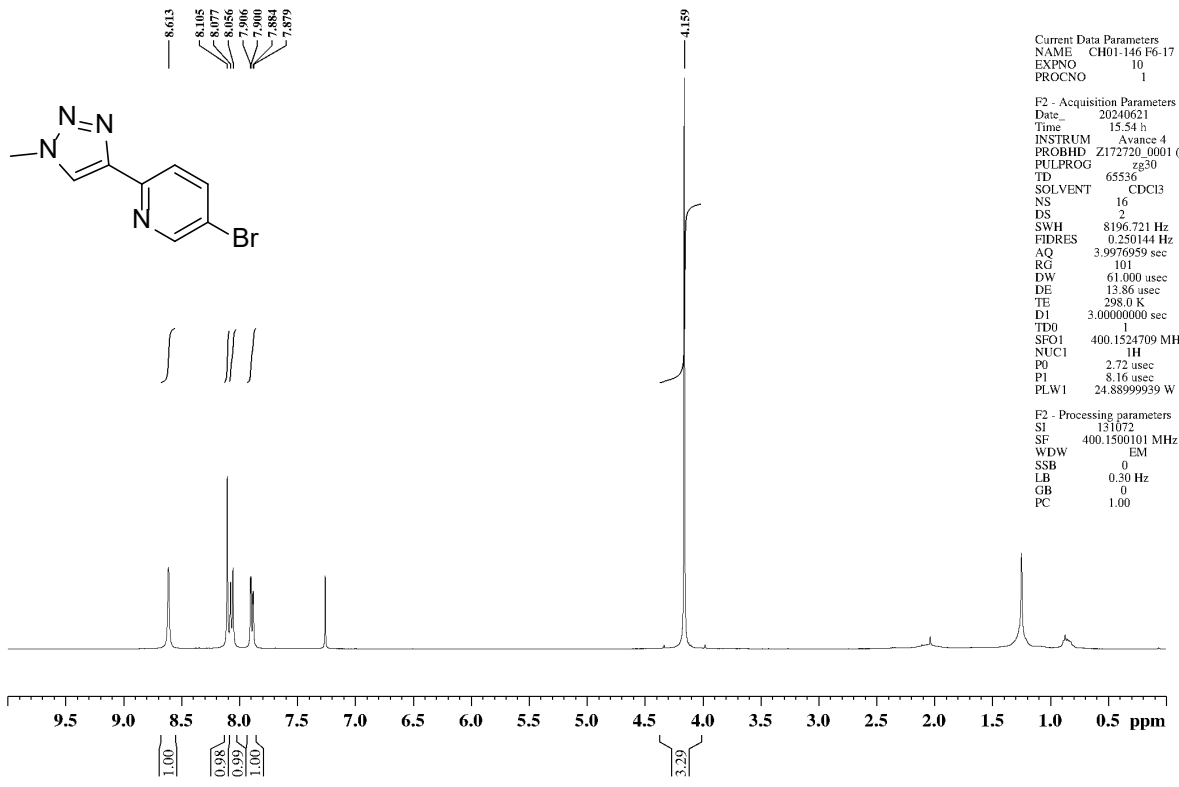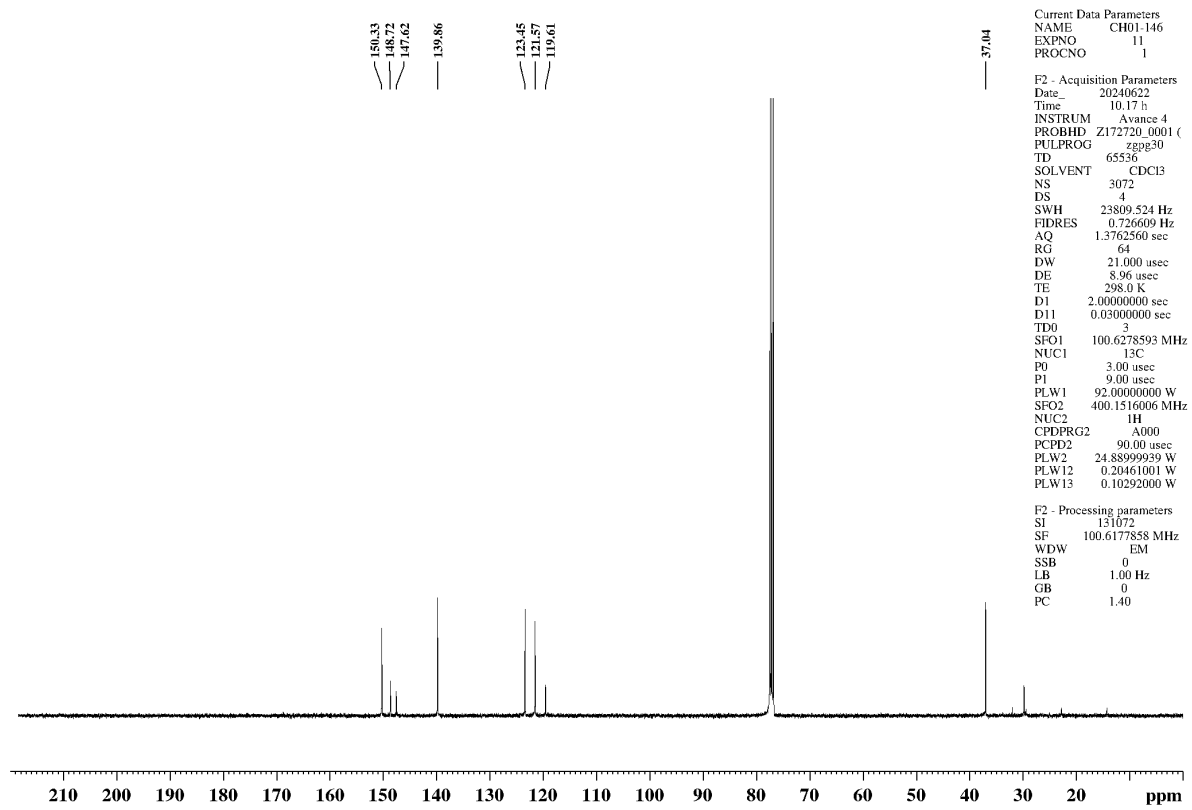

**<sup>1</sup>H and <sup>13</sup>C NMR of 3 (600 MHz, DMSO-d<sub>6</sub>):**

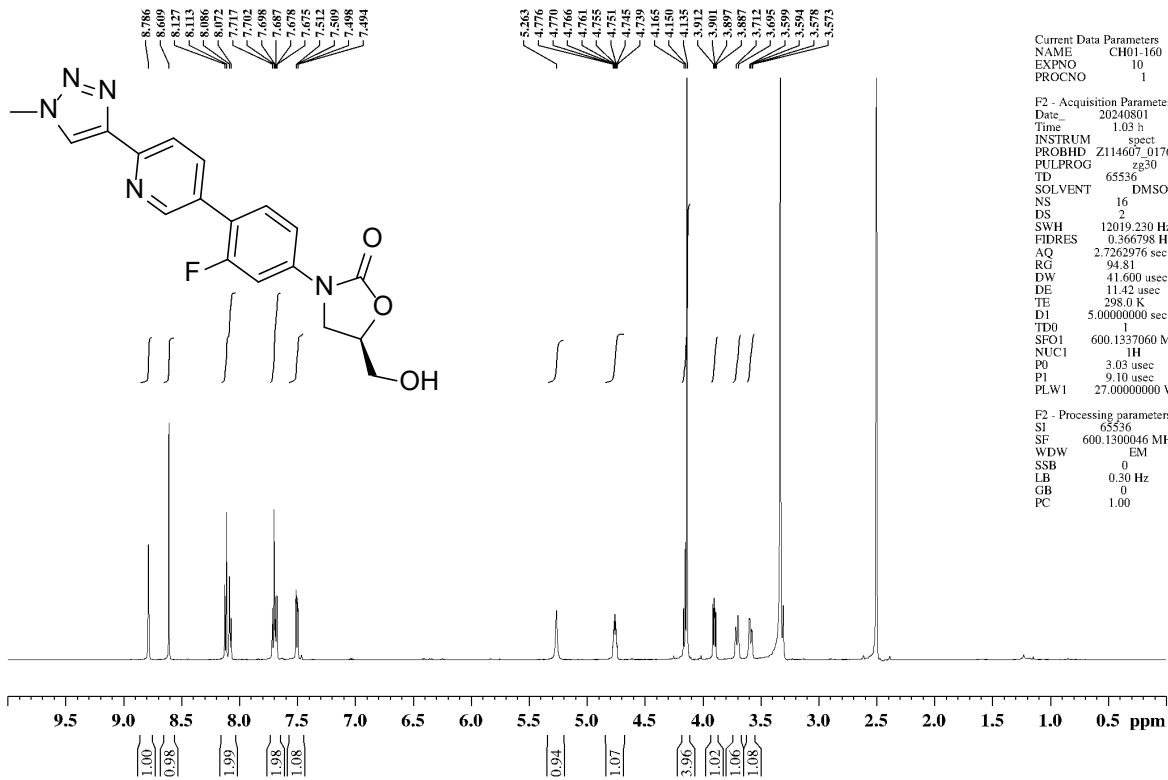

Current Data Parameters  
 NAME CH01-160  
 EXPNO 10  
 PROCNO 1

F2 - Acquisition Parameters  
 Date\_ 20240801  
 Time 1.03 h  
 INSTRUM spect  
 PROBHD Z114607\_0176 ( )  
 PULPROG zg30  
 TD 65536  
 SOLVENT DMSO  
 NS 16  
 DS 2  
 SWH 12019.230 Hz  
 FIDRES 0.366798 Hz  
 AQ 2.7262976 sec  
 RG 94.81  
 DW 41.600 usec  
 DE 11.42 usec  
 TE 298.0 K  
 D1 5.00000000 sec  
 TD0 1  
 SFO1 600.1337060 MHz  
 NUC1 <sup>1</sup>H  
 P0 3.03 usec  
 P1 9.10 usec  
 PLW1 27.00000000 W

F2 - Processing parameters  
 SI 65536  
 SF 600.1300046 MHz  
 WDW EM  
 SSB 0  
 LB 0.30 Hz  
 GB 0  
 PC 1.00

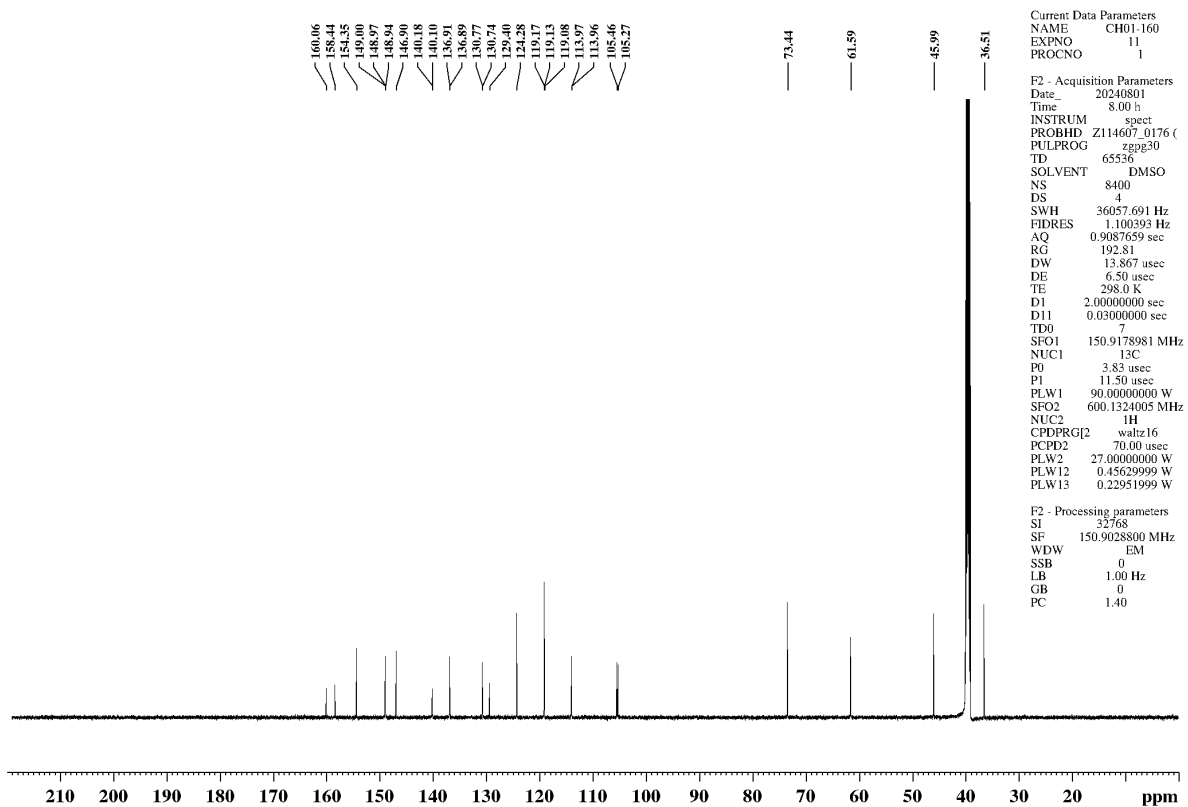

Current Data Parameters  
 NAME CH01-160  
 EXPNO 11  
 PROCNO 1

F2 - Acquisition Parameters  
 Date\_ 20240801  
 Time 8.00 h  
 INSTRUM spect  
 PROBHD Z114607\_0176 ( )  
 PULPROG zgpg30  
 TD 65536  
 SOLVENT DMSO  
 NS 8400  
 DS 4  
 SWH 36057.691 Hz  
 FIDRES 1.100393 Hz  
 AQ 0.9087659 sec  
 RG 192.81  
 DW 13.867 usec  
 DE 6.50 usec  
 TE 298.0 K  
 D1 2.00000000 sec  
 D11 0.03000000 sec  
 TD0 7  
 SFO1 150.9178981 MHz  
 NUC1 <sup>13</sup>C  
 P0 3.83 usec  
 P1 11.50 usec  
 PLW1 90.00000000 W  
 SFO2 600.1324005 MHz  
 NUC2 <sup>1</sup>H  
 CPDPRG2 waltz16  
 PCPD2 70.00 usec  
 PLW2 27.00000000 W  
 PLW12 0.45629999 W  
 PLW13 0.22951999 W

F2 - Processing parameters  
 SI 32768  
 SF 150.9028800 MHz  
 WDW EM  
 SSB 0  
 LB 1.00 Hz  
 GB 0  
 PC 1.40

**<sup>1</sup>H and <sup>13</sup>C NMR of 4 (600 MHz, DMSO-d<sub>6</sub>):**

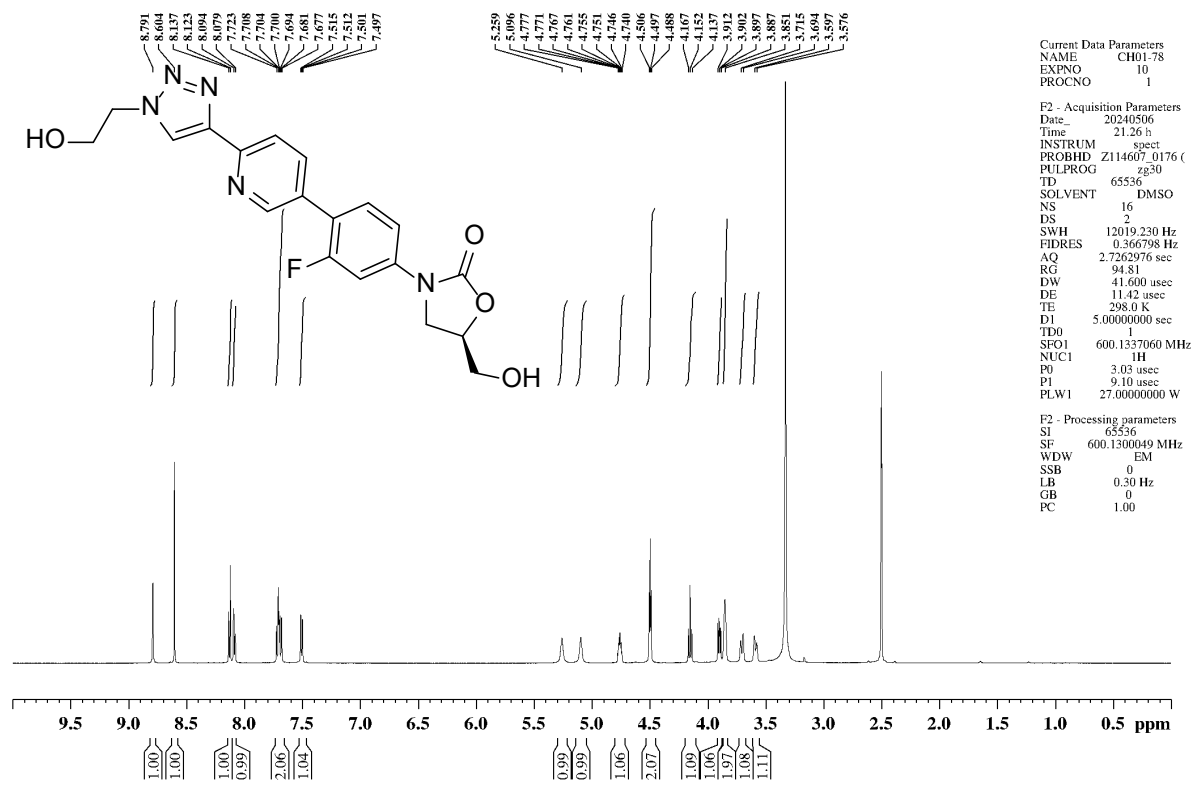

Current Data Parameters  
 NAME CH01-78  
 EXPNO 10  
 PROCNO 1

F2 - Acquisition Parameters  
 Date\_ 20240506  
 Time 21.26 h  
 INSTRUM spect  
 PROBHD Z114607\_0176 (Z  
 PULPROG zg30  
 TD 65536  
 SOLVENT DMSO  
 NS 16  
 DS 2  
 SWH 12019.230 Hz  
 FIDRES 0.366798 Hz  
 AQ 2.7262976 sec  
 RG 94.81  
 DW 41.600 usec  
 DE 11.42 usec  
 TE 298.0 K  
 D1 5.0000000 sec  
 TD0 1  
 SFO1 600.1337060 MHz  
 NUC1 <sup>1</sup>H  
 P0 3.03 usec  
 P1 9.10 usec  
 PLW1 27.00000000 W

F2 - Processing parameters  
 SI 65536  
 SF 600.1300049 MHz  
 WDW EM  
 SSB 0  
 LB 0.30 Hz  
 GB 0  
 PC 1.00

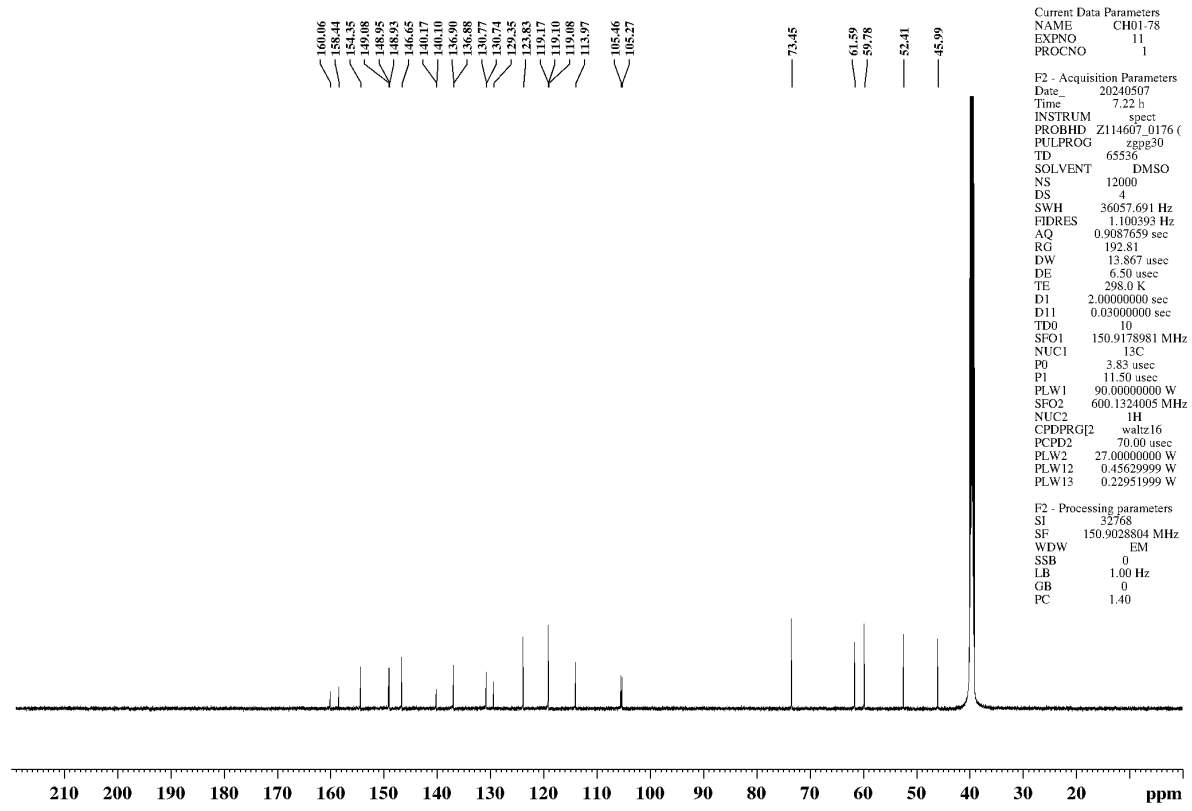

Current Data Parameters  
 NAME CH01-78  
 EXPNO 11  
 PROCNO 1

F2 - Acquisition Parameters  
 Date\_ 20240507  
 Time 7.22 h  
 INSTRUM spect  
 PROBHD Z114607\_0176 (Z  
 PULPROG zgpg30  
 TD 65536  
 SOLVENT DMSO  
 NS 12000  
 DS 4  
 SWH 36057.691 Hz  
 FIDRES 1.100393 Hz  
 AQ 0.9087659 sec  
 RG 192.81  
 DW 13.867 usec  
 DE 6.50 usec  
 TE 298.0 K  
 D1 2.0000000 sec  
 D11 0.0300000 sec  
 TD0 10  
 SFO1 150.9178981 MHz  
 NUC1 <sup>13</sup>C  
 P0 3.83 usec  
 P1 11.50 usec  
 PLW1 90.00000000 W  
 SFO2 600.1324005 MHz  
 NUC2 <sup>1</sup>H  
 CPDPRG2 waltz16  
 PCPD2 70.00 usec  
 PLW2 27.00000000 W  
 PLW12 0.45629999 W  
 PLW13 0.22951999 W

F2 - Processing parameters  
 SI 32768  
 SF 150.9028804 MHz  
 WDW EM  
 SSB 0  
 LB 1.00 Hz  
 GB 0  
 PC 1.40

**<sup>1</sup>H and <sup>13</sup>C NMR of 5 (400 MHz, DMSO-d<sub>6</sub>):**

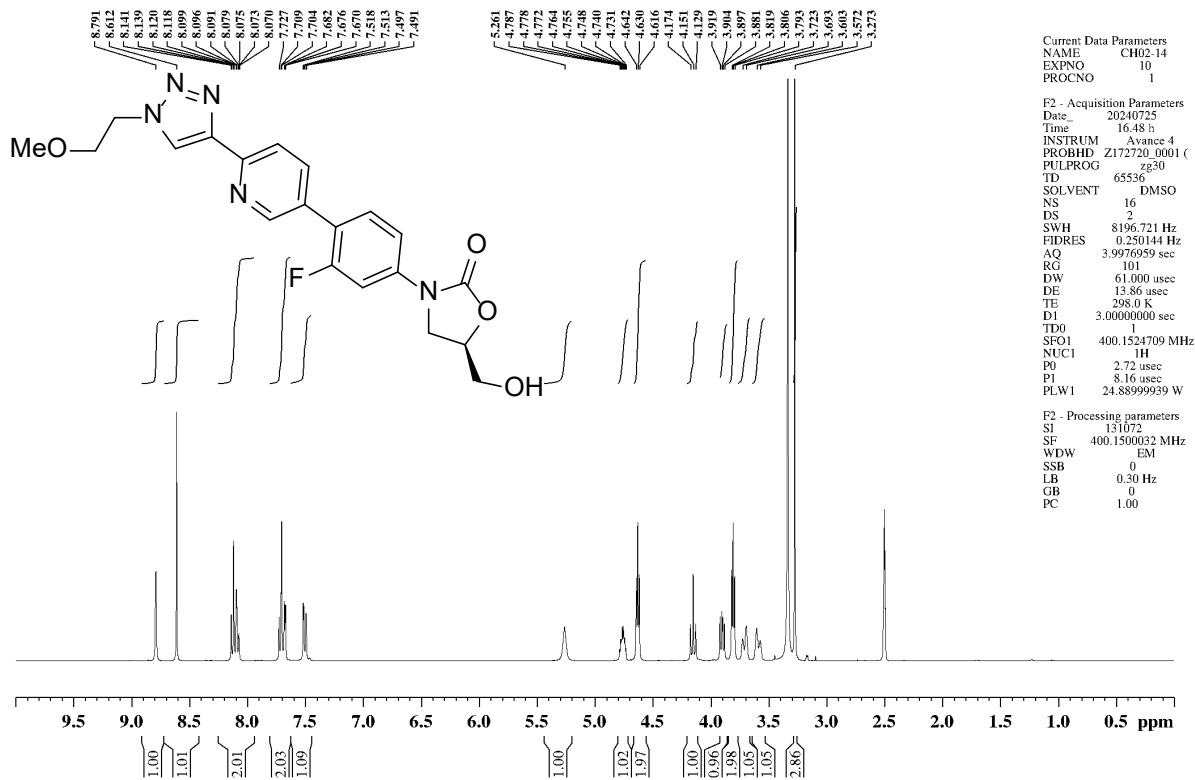

Current Data Parameters  
 NAME CH02-14  
 EXPNO 10  
 PROCNO 1  
 F2 - Acquisition Parameters  
 Date\_ 20240725  
 Time 16.48 h  
 INSTRUM Avance 4  
 PROBHD Z172720\_0001 (Z)  
 PULPROG zg30  
 TD 65536  
 SOLVENT DMSO  
 NS 16  
 DS 2  
 SWH 8196.721 Hz  
 FIDRES 0.250144 Hz  
 AQ 3.9976959 sec  
 RG 101  
 DW 61.000 usec  
 DE 13.86 usec  
 TE 298.0 K  
 D1 3.0000000 sec  
 TD0 1  
 SFO1 400.1524709 MHz  
 NUC1 1H  
 P0 2.72 usec  
 P1 8.16 usec  
 PLW1 24.88999939 W  
 F2 - Processing parameters  
 SI 131072  
 SF 400.1500032 MHz  
 WDW EM  
 SSB 0  
 LB 0.30 Hz  
 GB 0  
 PC 1.00

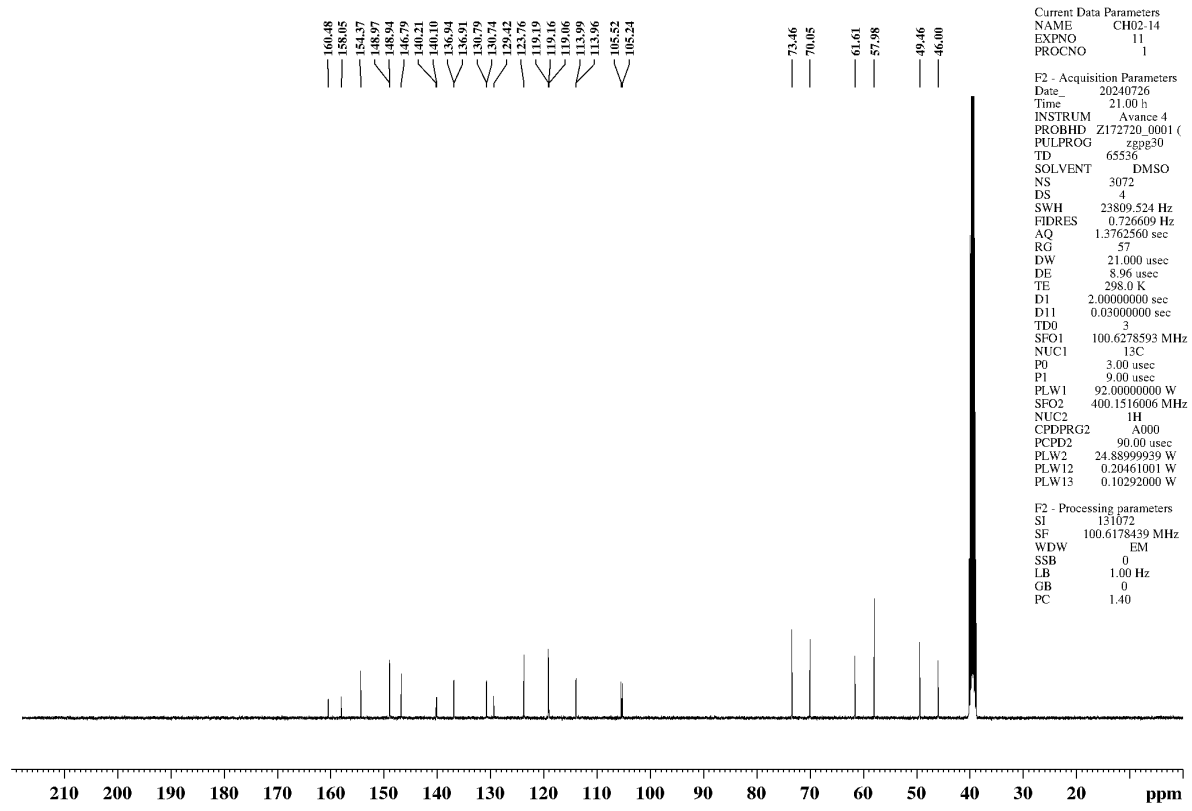

Current Data Parameters  
 NAME CH02-14  
 EXPNO 11  
 PROCNO 1  
 F2 - Acquisition Parameters  
 Date\_ 20240726  
 Time 21.00 h  
 INSTRUM Avance 4  
 PROBHD Z172720\_0001 (Z)  
 PULPROG zgpg30  
 TD 65536  
 SOLVENT DMSO  
 NS 3072  
 DS 4  
 SWH 23809.524 Hz  
 FIDRES 0.726609 Hz  
 AQ 1.3762560 sec  
 RG 57  
 DW 21.000 usec  
 DE 8.96 usec  
 TE 298.0 K  
 D1 2.0000000 sec  
 D11 0.0300000 sec  
 TD0 3  
 SFO1 100.6278593 MHz  
 NUC1 13C  
 P0 3.00 usec  
 P1 9.00 usec  
 PLW1 92.0000000 W  
 SFO2 400.1516006 MHz  
 NUC2 1H  
 CPDPRG2 A000  
 PCPD2 90.00 usec  
 PLW2 24.88999939 W  
 PLW12 0.20461001 W  
 PLW13 0.10292000 W  
 F2 - Processing parameters  
 SI 131072  
 SF 100.6178439 MHz  
 WDW EM  
 SSB 0  
 LB 1.00 Hz  
 GB 0  
 PC 1.40

# <sup>1</sup>H and <sup>13</sup>C NMR of Boc-protected 6 (500 MHz, DMSO-d<sub>6</sub>):

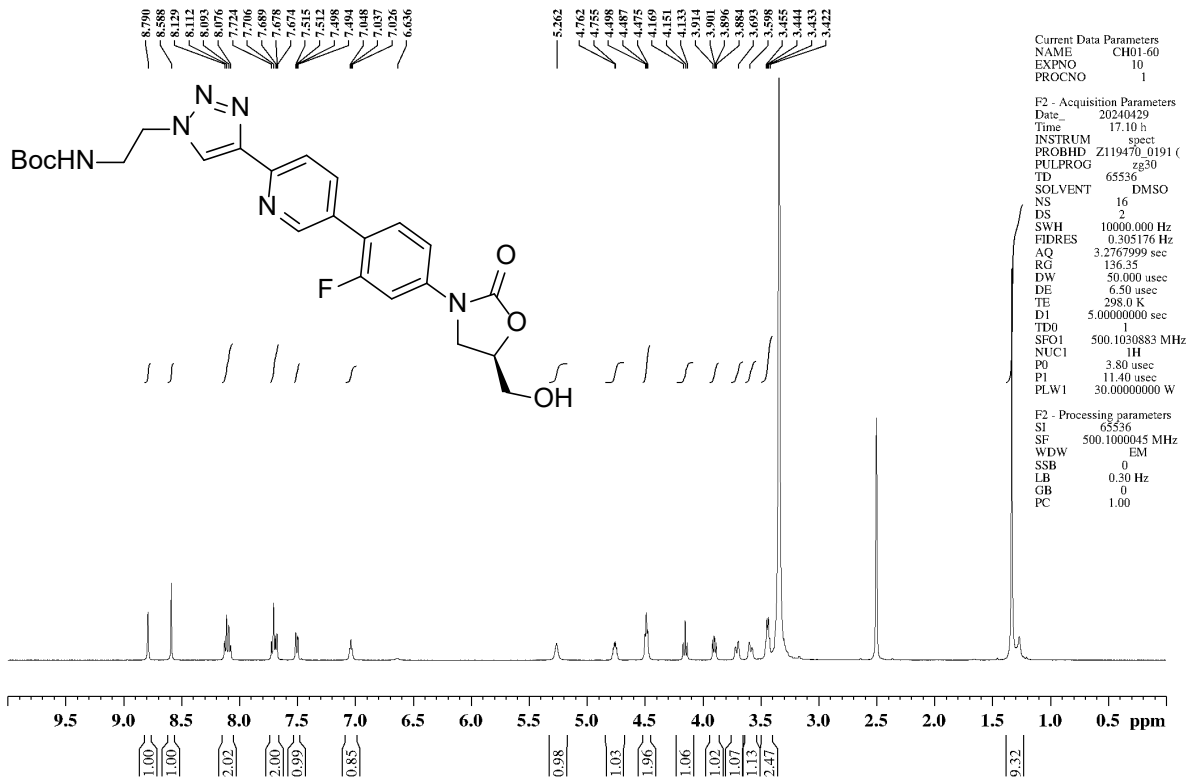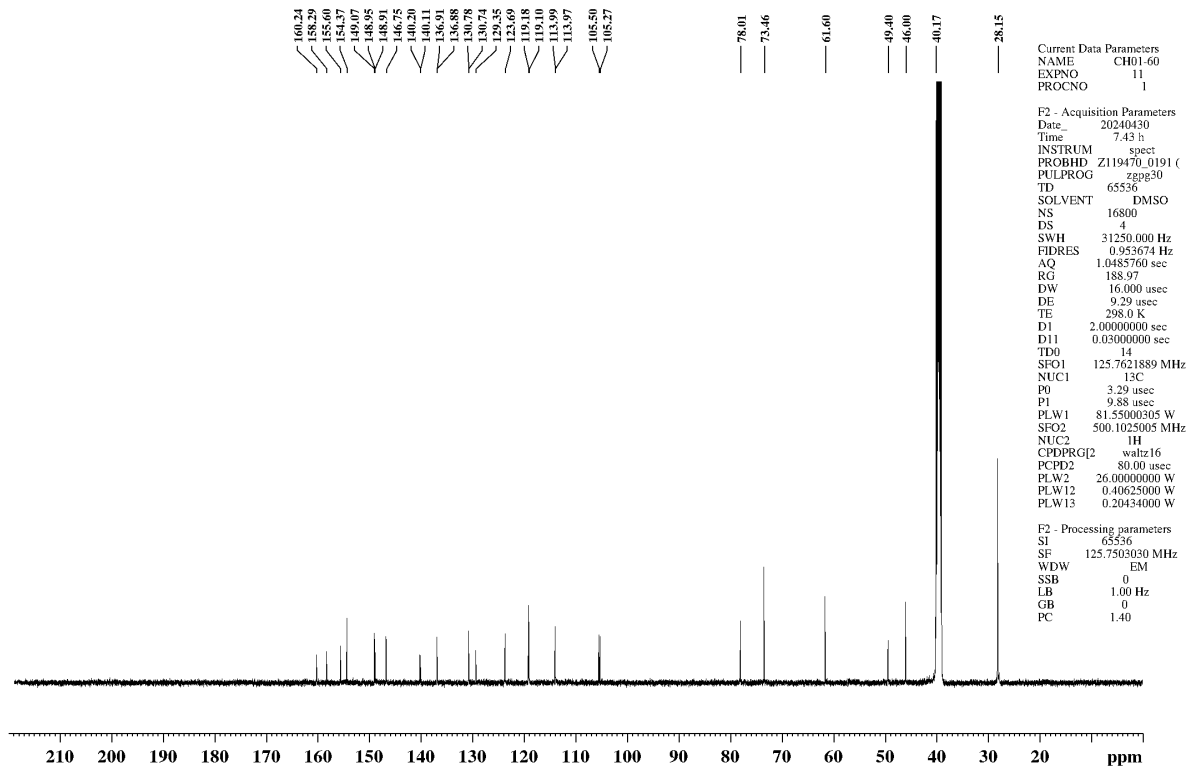

**<sup>1</sup>H and <sup>13</sup>C (as TFA salt) NMR of 6 (600 MHz, DMSO-d<sub>6</sub>):**

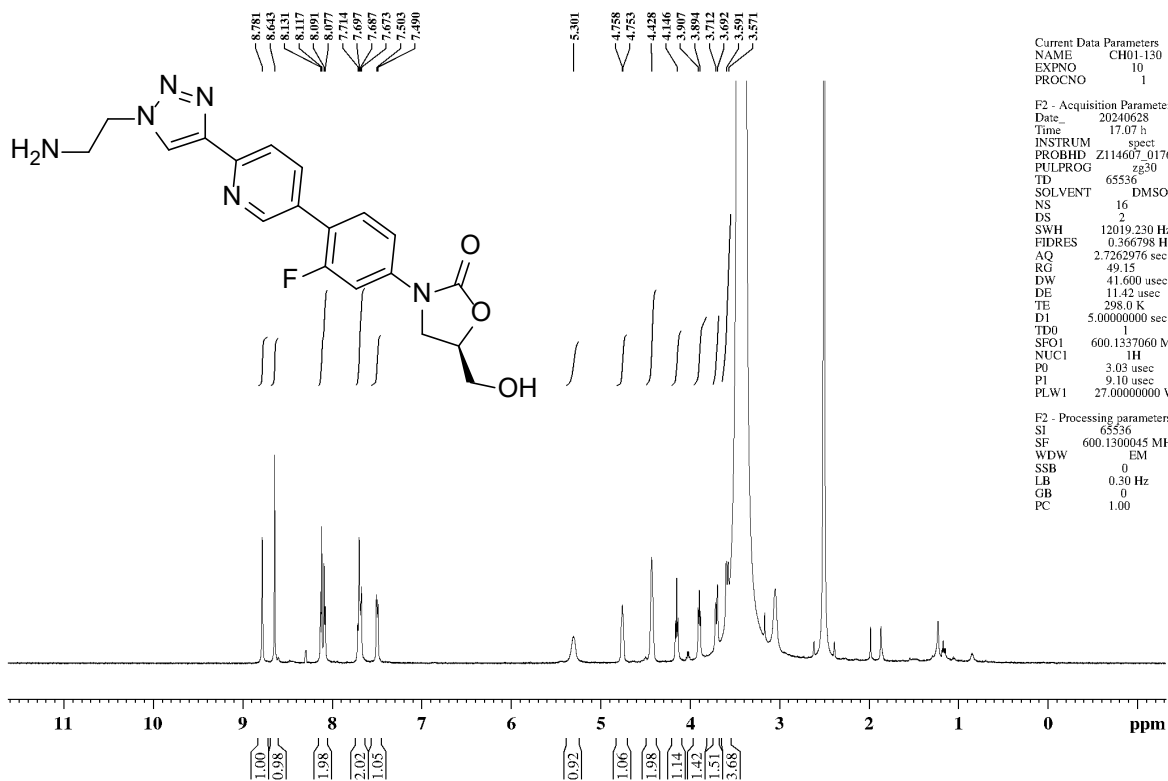

Current Data Parameters  
 NAME CH01-130  
 EXPNO 10  
 PROCNO 1

F2 - Acquisition Parameters  
 Date\_ 20240628  
 Time 17.07 h  
 INSTRUM spect  
 PROBHD Z114607\_0176 (Z)  
 PULPROG zg30  
 TD 65536  
 SOLVENT DMSO  
 NS 16  
 DS 2  
 SWH 12019.230 Hz  
 FIDRES 0.366798 Hz  
 AQ 2.7262976 sec  
 RG 49.15  
 DW 41.600 usec  
 DE 11.42 usec  
 TE 298.0 K  
 D1 5.00000000 sec  
 TD0 1  
 SFO1 600.1337060 MHz  
 NUC1 1H  
 P0 3.03 usec  
 P1 9.10 usec  
 PLW1 27.0000000 W

F2 - Processing parameters  
 SI 65536  
 SF 600.1300045 MHz  
 WDW EM  
 SSB 0  
 LB 0.30 Hz  
 GB 9  
 PC 1.00

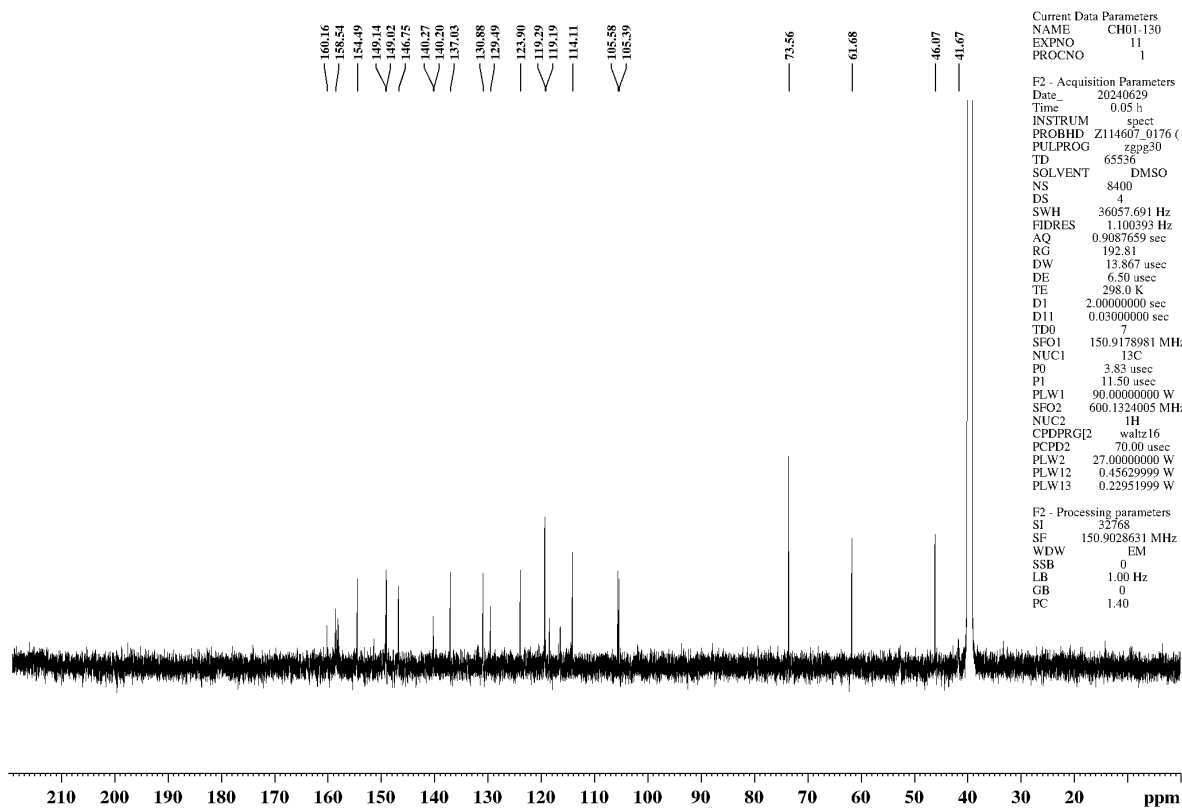

Current Data Parameters  
 NAME CH01-130  
 EXPNO 11  
 PROCNO 1

F2 - Acquisition Parameters  
 Date\_ 20240629  
 Time 0.05 h  
 INSTRUM spect  
 PROBHD Z114607\_0176 (Z)  
 PULPROG zgpg30  
 TD 65536  
 SOLVENT DMSO  
 NS 8400  
 DS 4  
 SWH 36057.691 Hz  
 FIDRES 1.100393 Hz  
 AQ 0.9087659 sec  
 RG 192.81  
 DW 13.867 usec  
 DE 6.50 usec  
 TE 298.0 K  
 D1 2.00000000 sec  
 D11 0.03000000 sec  
 TD0 7  
 SFO1 150.9178981 MHz  
 NUC1 13C  
 P0 3.83 usec  
 P1 11.50 usec  
 PLW1 90.0000000 W  
 SFO2 600.1324005 MHz  
 NUC2 1H  
 CPDPRG2 walz16  
 PCPD2 70.00 usec  
 PLW2 27.00000000 W  
 PLW12 0.45629999 W  
 PLW13 0.22951999 W

F2 - Processing parameters  
 SI 32768  
 SF 150.9028631 MHz  
 WDW EM  
 SSB 0  
 LB 1.00 Hz  
 GB 0  
 PC 1.40

# <sup>1</sup>H and <sup>13</sup>C NMR of 7 (500 MHz, DMSO-d<sub>6</sub>):

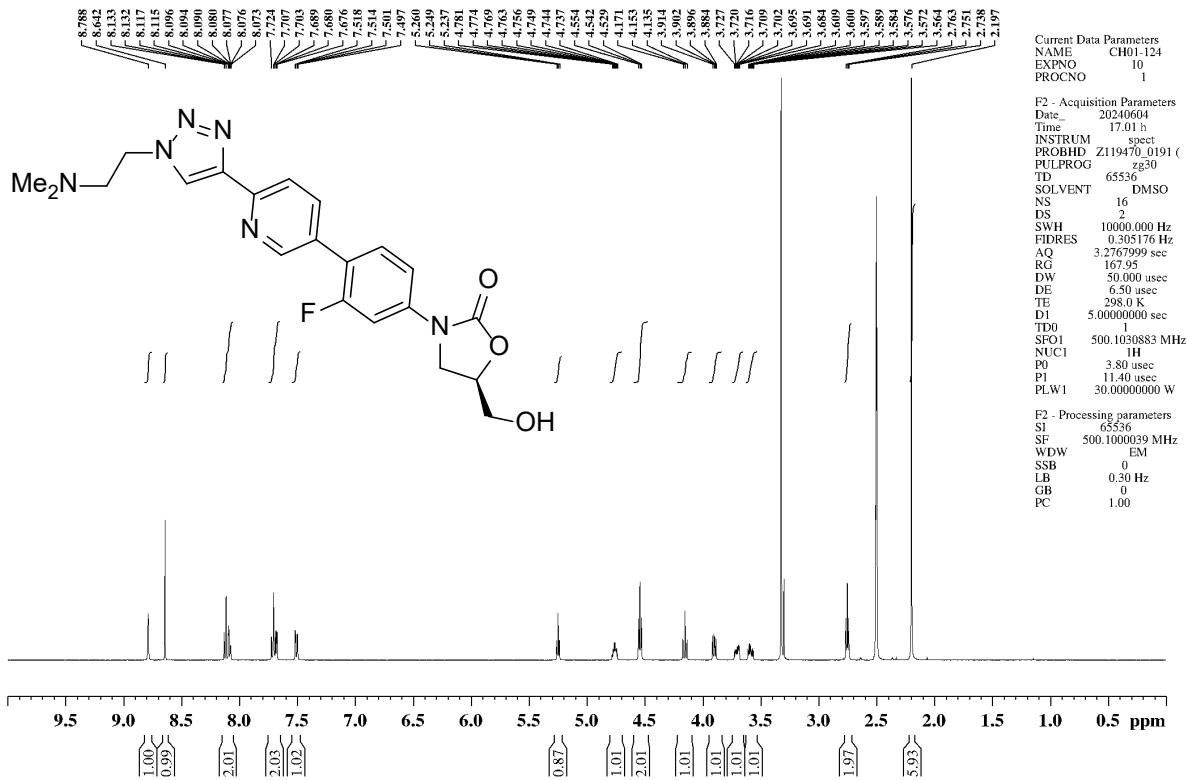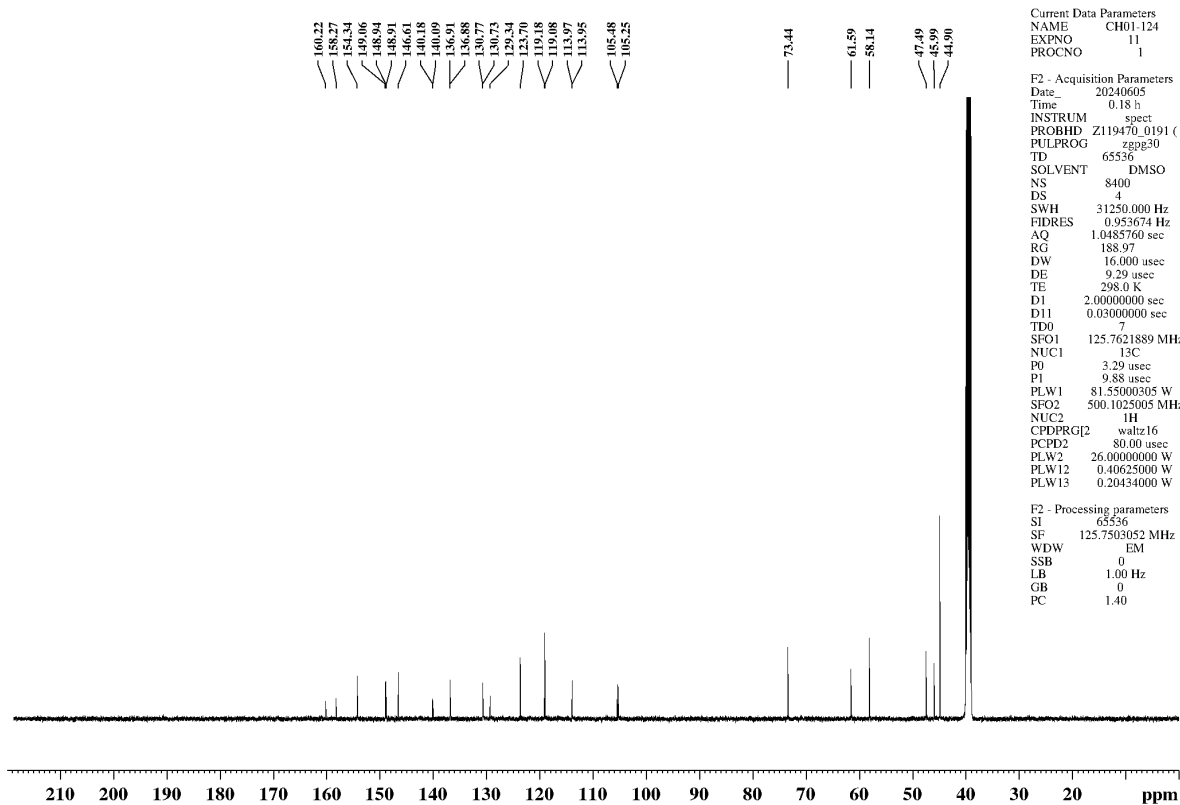

**<sup>1</sup>H and <sup>13</sup>C NMR of 8 (400 MHz, DMSO-d<sub>6</sub>):**

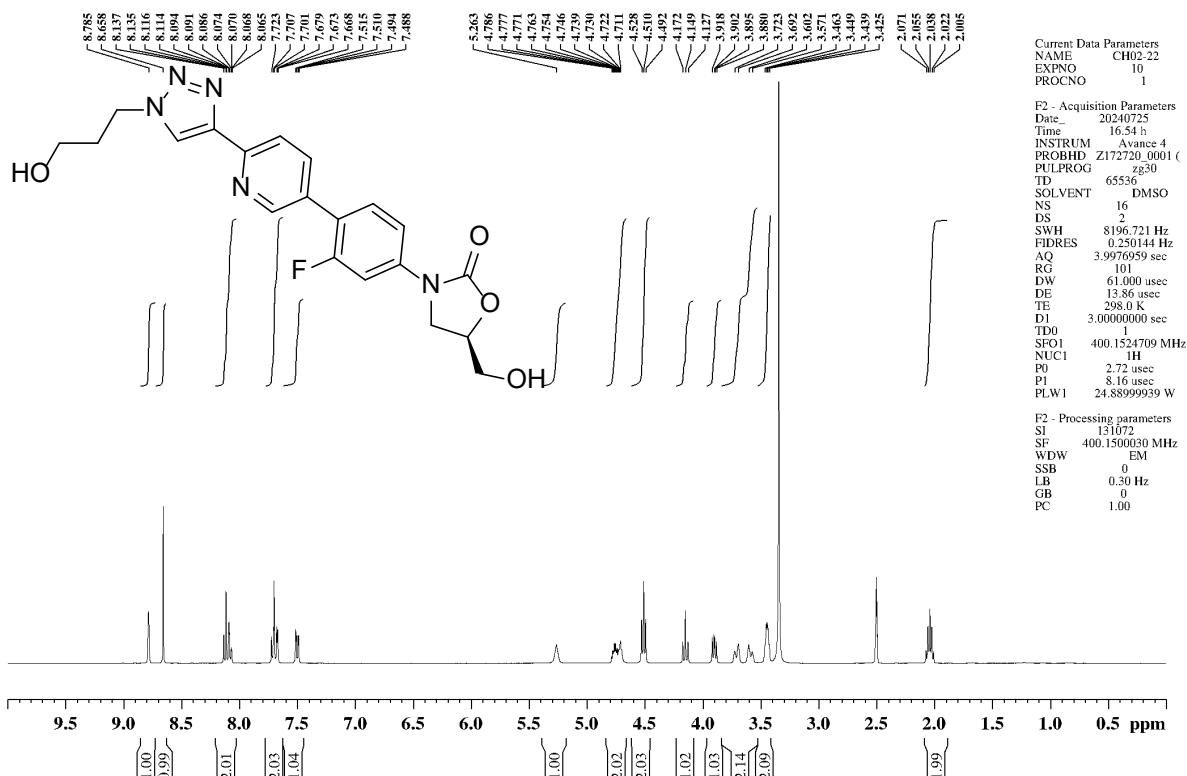

Current Data Parameters  
 NAME CH02-22  
 EXPNO 10  
 PROCNO 1

F2 - Acquisition Parameters  
 Date\_ 20240725  
 Time 16.54 h  
 INSTRUM Avance 4  
 PROBHD Z172720\_0001 (C  
 PULPROG zg30  
 TD 65536  
 SOLVENT DMSO  
 NS 16  
 DS 2  
 SWH 8196.721 Hz  
 FIDRES 0.250144 Hz  
 AQ 3.9976959 sec  
 RG 101  
 DW 61.000 usec  
 DE 13.86 usec  
 TE 298.0 K  
 D1 3.00000000 sec  
 TD0  
 SFO1 400.1524709 MHz  
 NUC1 <sup>1</sup>H  
 P0 2.72 usec  
 P1 8.16 usec  
 PLW1 24.88999939 W

F2 - Processing parameters  
 SI 131072  
 SF 400.1500030 MHz  
 WDW EM  
 SSB 0  
 LB 0.30 Hz  
 GB 0  
 PC 1.00

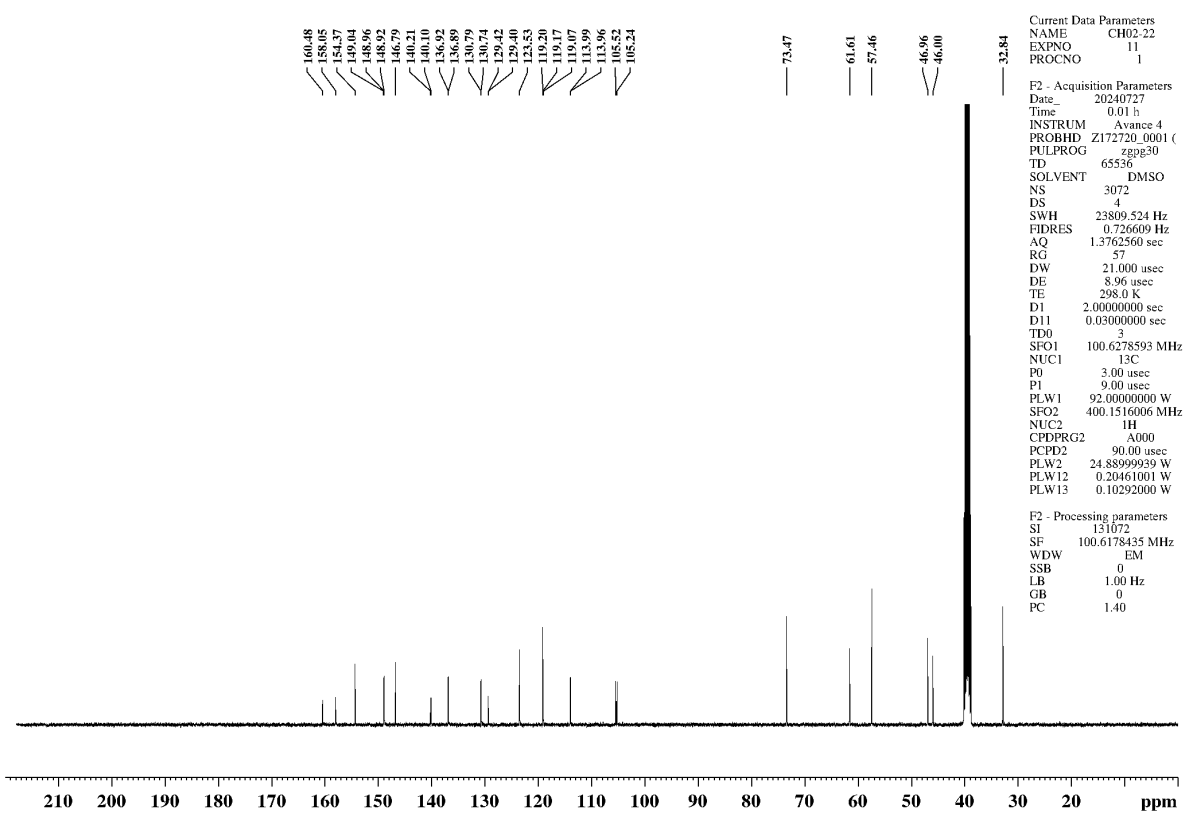

Current Data Parameters  
 NAME CH02-22  
 EXPNO 11  
 PROCNO 1

F2 - Acquisition Parameters  
 Date\_ 20240727  
 Time 0.01 h  
 INSTRUM Avance 4  
 PROBHD Z172720\_0001 (C  
 PULPROG zgpg30  
 TD 65536  
 SOLVENT DMSO  
 NS 3072  
 DS 4  
 SWH 23809.524 Hz  
 FIDRES 0.726609 Hz  
 AQ 1.3762560 sec  
 RG 57  
 DW 21.000 usec  
 DE 8.96 usec  
 TE 298.0 K  
 D1 2.00000000 sec  
 D11 0.03000000 sec  
 TD0 3  
 SFO1 100.6278593 MHz  
 NUC1 <sup>13</sup>C  
 P0 3.00 usec  
 P1 9.00 usec  
 PLW1 92.0000000 W  
 SFO2 400.1516006 MHz  
 NUC2 <sup>1</sup>H  
 CPDPRG2 A000  
 PCPD2 90.00 usec  
 PLW2 24.88999939 W  
 PLW12 0.20461001 W  
 PLW13 0.10292000 W

F2 - Processing parameters  
 SI 131072  
 SF 100.6178435 MHz  
 WDW EM  
 SSB 0  
 LB 1.00 Hz  
 GB 0  
 PC 1.40

# <sup>1</sup>H and <sup>13</sup>C NMR of 9 (600 MHz, DMSO-d<sub>6</sub>):

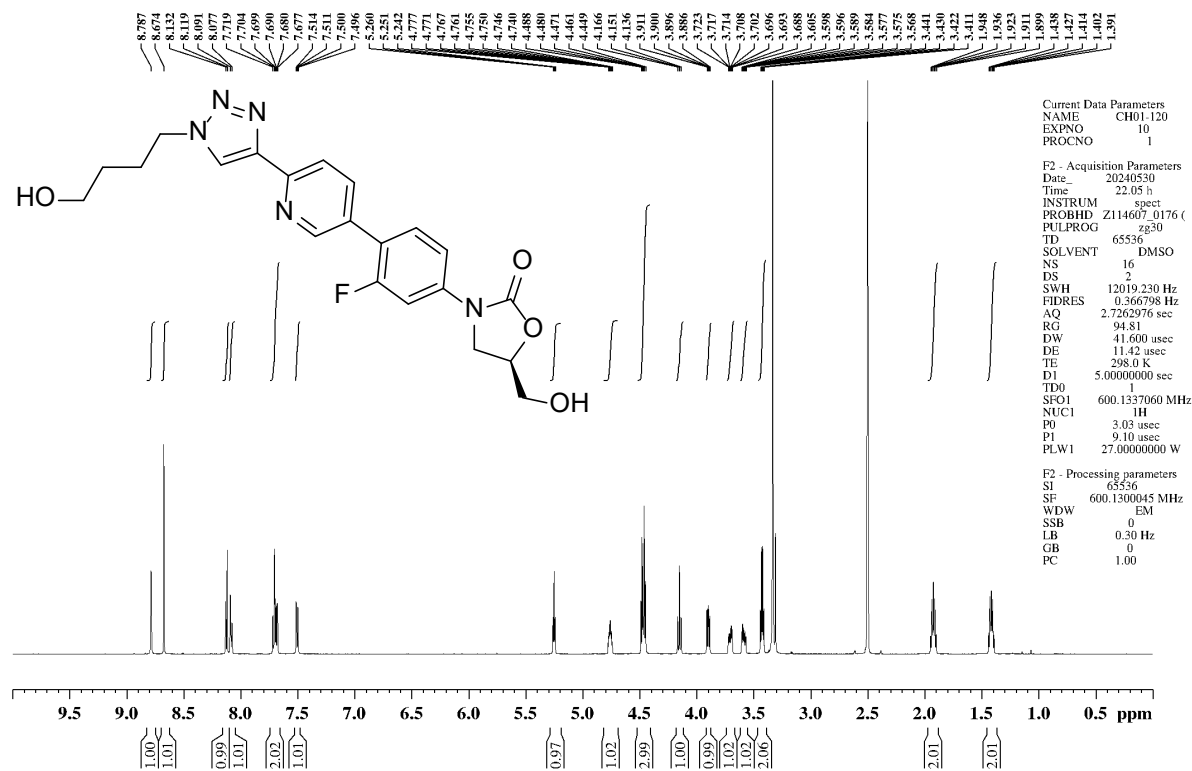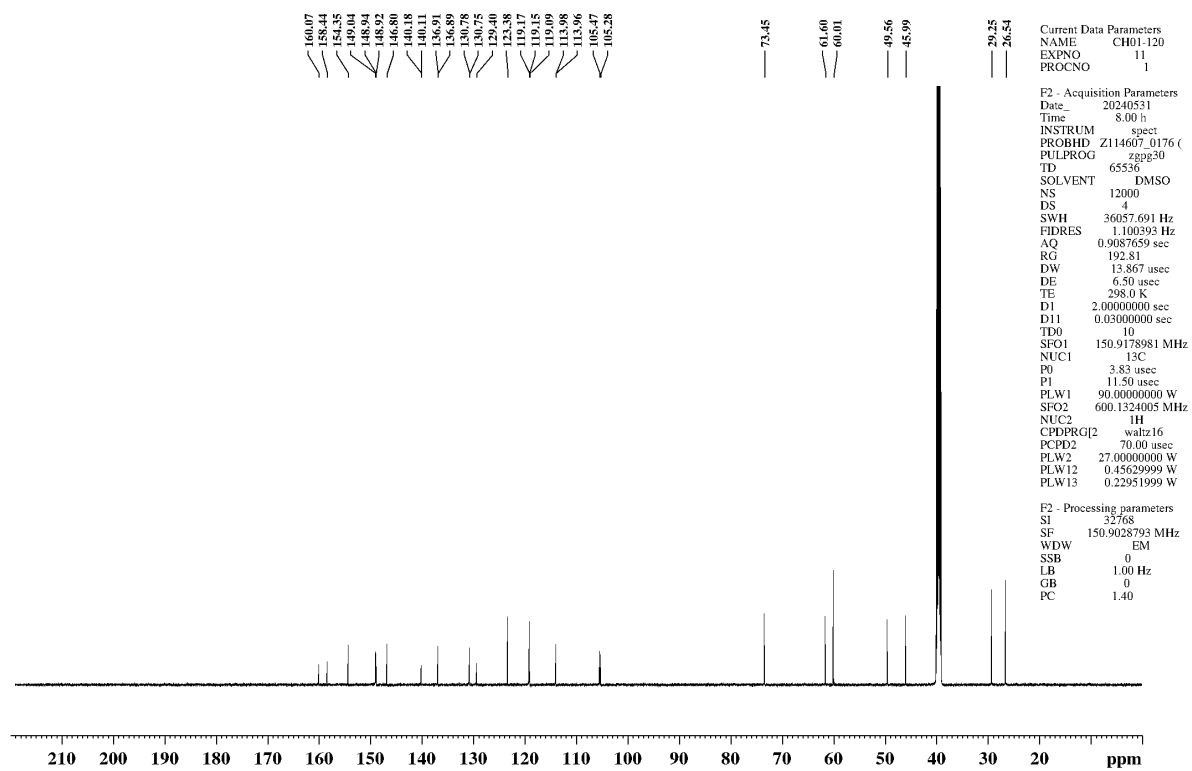

# <sup>1</sup>H and <sup>13</sup>C NMR of Boc-protected 10 (600 MHz, DMSO-d<sub>6</sub>):

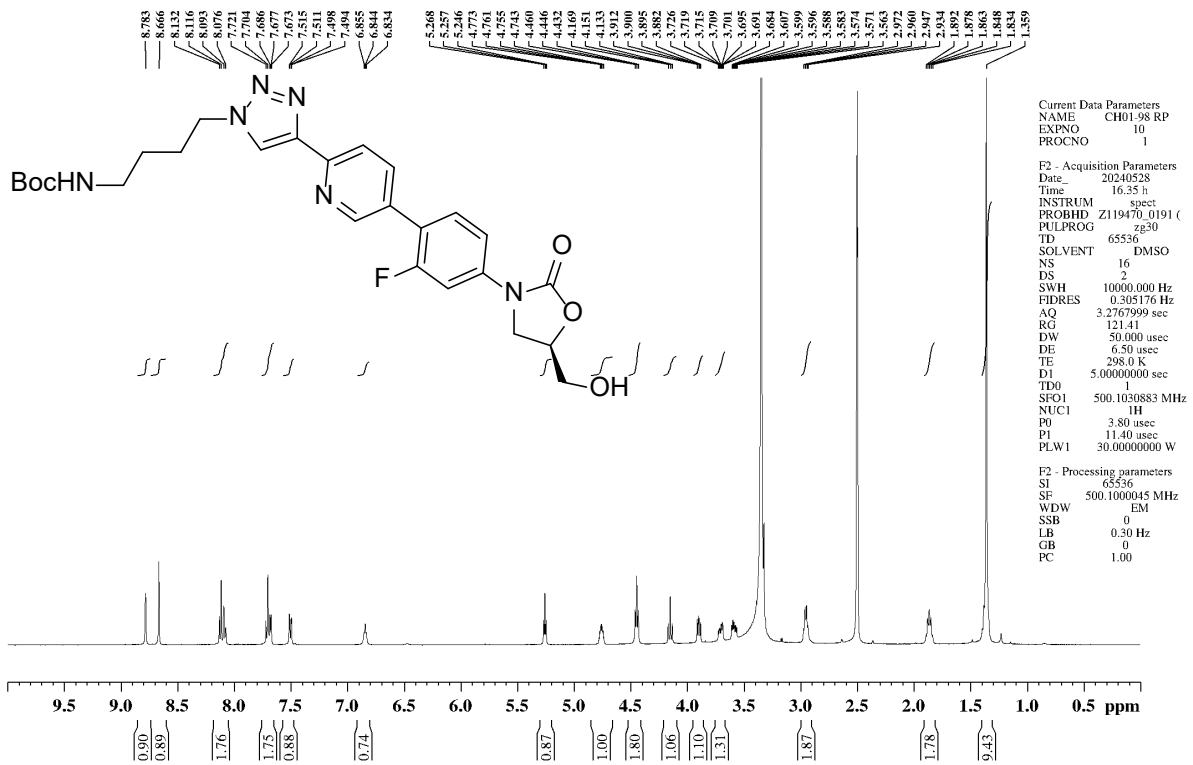

Current Data Parameters  
 NAME CH01-98 RP  
 EXPNO 10  
 PROCNO 1

F2 - Acquisition Parameters  
 Date\_ 20240528  
 Time 16.35 h  
 INSTRUM spect  
 PROBHD Z119470\_0191 ( )  
 PULPROG zg30  
 TD 65536  
 SOLVENT DMSO  
 NS 16  
 DS 2  
 SWH 10000.000 Hz  
 FIDRES 0.305176 Hz  
 AQ 3.2767999 sec  
 RG 121.41  
 DW 50.000 usec  
 DE 6.50 usec  
 TE 298.0 K  
 D1 5.0000000 sec  
 TD0 1  
 SFO1 500.1030883 MHz  
 NUC1 <sup>1</sup>H  
 P0 3.80 usec  
 PL1 11.40 usec  
 PLW1 30.0000000 W

F2 - Processing parameters  
 SI 65536  
 SF 500.1000045 MHz  
 WDW EM  
 SSB 0  
 LB 0.30 Hz  
 GB 0  
 PC 1.00

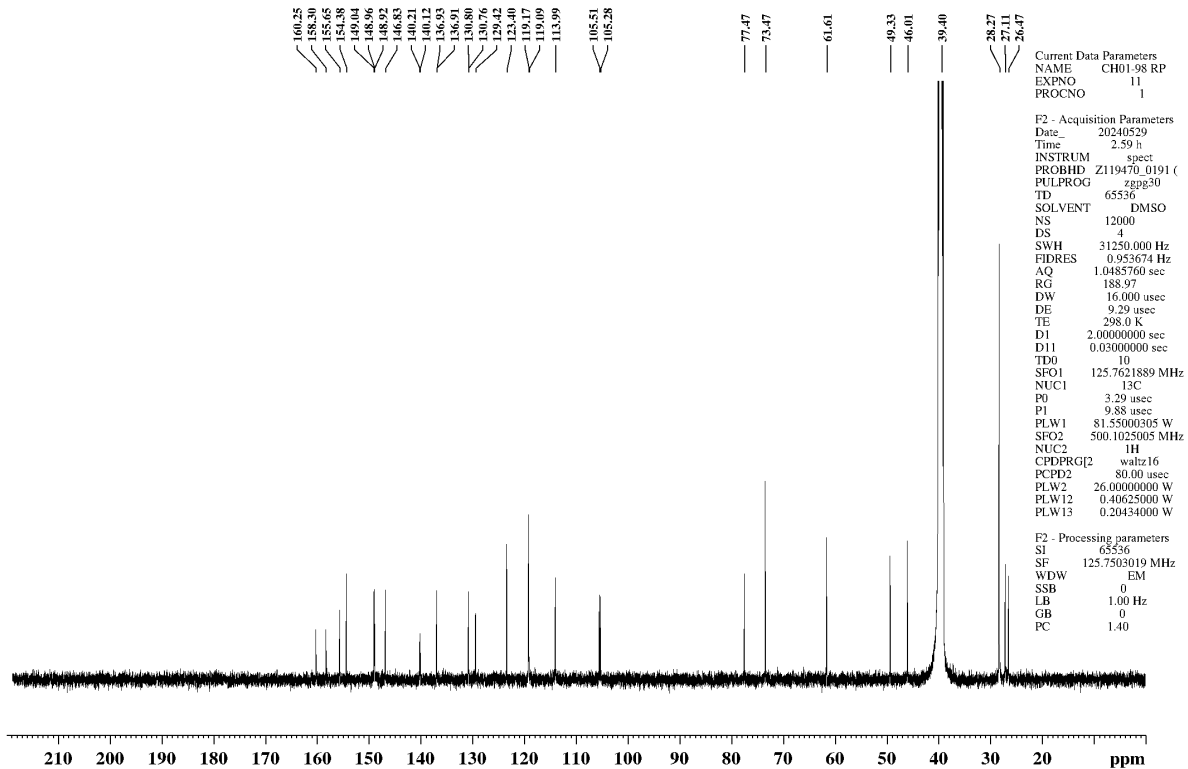

Current Data Parameters  
 NAME CH01-98 RP  
 EXPNO 11  
 PROCNO 1

F2 - Acquisition Parameters  
 Date\_ 20240529  
 Time 2.59 h  
 INSTRUM spect  
 PROBHD Z119470\_0191 ( )  
 PULPROG zgpg30  
 TD 65536  
 SOLVENT DMSO  
 NS 12000  
 DS 4  
 SWH 31250.000 Hz  
 FIDRES 0.953674 Hz  
 AQ 1.0485760 sec  
 RG 188.97  
 DW 16.000 usec  
 DE 9.29 usec  
 TE 298.0 K  
 D1 2.0000000 sec  
 D11 0.0300000 sec  
 TD0 10  
 SFO1 125.7621889 MHz  
 NUC1 <sup>13</sup>C  
 P0 3.29 usec  
 P1 9.88 usec  
 PLW1 81.55000305 W  
 SFO2 500.1025005 MHz  
 NUC2 <sup>1</sup>H  
 CPMRG[2] waltz16  
 PCPD2 80.00 usec  
 PLW2 26.0000000 W  
 PLW12 0.40625000 W  
 PLW13 0.20434000 W

F2 - Processing parameters  
 SI 65536  
 SF 125.7503019 MHz  
 WDW EM  
 SSB 0  
 LB 1.00 Hz  
 GB 0  
 PC 1.40

# <sup>1</sup>H and <sup>13</sup>C NMR of 10 (600 MHz, DMSO-d<sub>6</sub>):

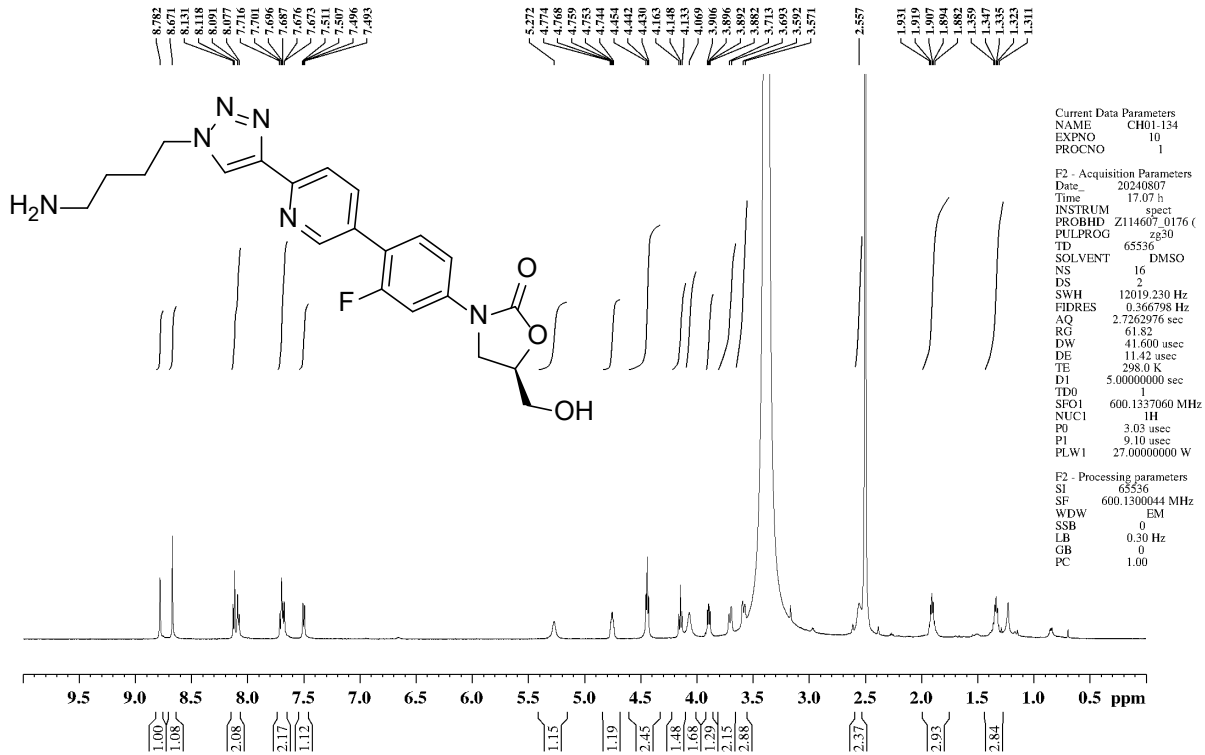

Current Data Parameters  
 NAME CH01-134  
 EXPNO 10  
 PROCNO 1

F2 - Acquisition Parameters  
 Date\_ 20240807  
 Time 17.07 h  
 INSTRUM spect  
 PROBHD Z114607\_0176 ( )  
 PULPROG zg30  
 TD 65536  
 SOLVENT DMSO  
 NS 16  
 DS 2  
 SWH 12019.230 Hz  
 FIDRES 0.366798 Hz  
 AQ 2.7262976 sec  
 RG 61.82  
 DW 41.600 usec  
 DE 11.42 usec  
 TE 298.0 K  
 D1 5.00000000 sec  
 TD0  
 SFO1 600.1337060 MHz  
 NUC1 <sup>1</sup>H  
 PU 3.03 usec  
 PI 9.10 usec  
 PLW1 27.00000000 W

F2 - Processing parameters  
 SI 65536  
 SF 600.1300044 MHz  
 WDW EM  
 SSB 0  
 LB 0.30 Hz  
 GB 0  
 PC 1.00

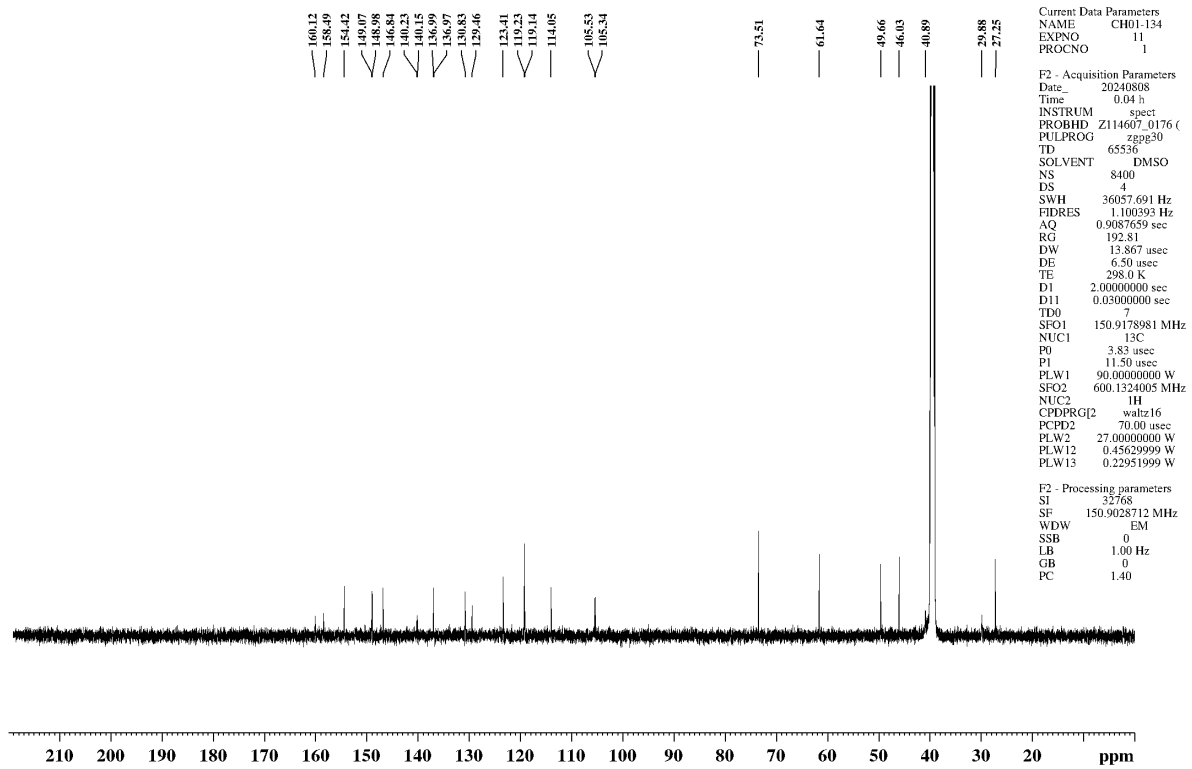

Current Data Parameters  
 NAME CH01-134  
 EXPNO 11  
 PROCNO 1

F2 - Acquisition Parameters  
 Date\_ 20240808  
 Time 0.04 h  
 INSTRUM spect  
 PROBHD Z114607\_0176 ( )  
 PULPROG zgpg30  
 TD 65536  
 SOLVENT DMSO  
 NS 8400  
 DS 4  
 SWH 36057.691 Hz  
 FIDRES 1.100393 Hz  
 AQ 0.9087659 sec  
 RG 192.81  
 DW 13.867 usec  
 DE 6.50 usec  
 TE 298.0 K  
 D1 2.00000000 sec  
 D11 0.03000000 sec  
 TD0 7  
 SFO1 150.9178981 MHz  
 NUC1 <sup>13</sup>C  
 PU 3.83 usec  
 PI 11.50 usec  
 PLW1 90.00000000 W  
 SFO2 600.1324005 MHz  
 NUC2 <sup>1</sup>H  
 CPDPRG2 waltz16  
 PCPD2 70.00 usec  
 PLW2 27.00000000 W  
 PLW12 0.45629999 W  
 PLW13 0.22951999 W

F2 - Processing parameters  
 SI 25768  
 SF 150.9028712 MHz  
 WDW EM  
 SSB 0  
 LB 1.00 Hz  
 GB 0  
 PC 1.40

# <sup>1</sup>H and <sup>13</sup>C NMR of 11 (600 MHz, DMSO-d<sub>6</sub>):

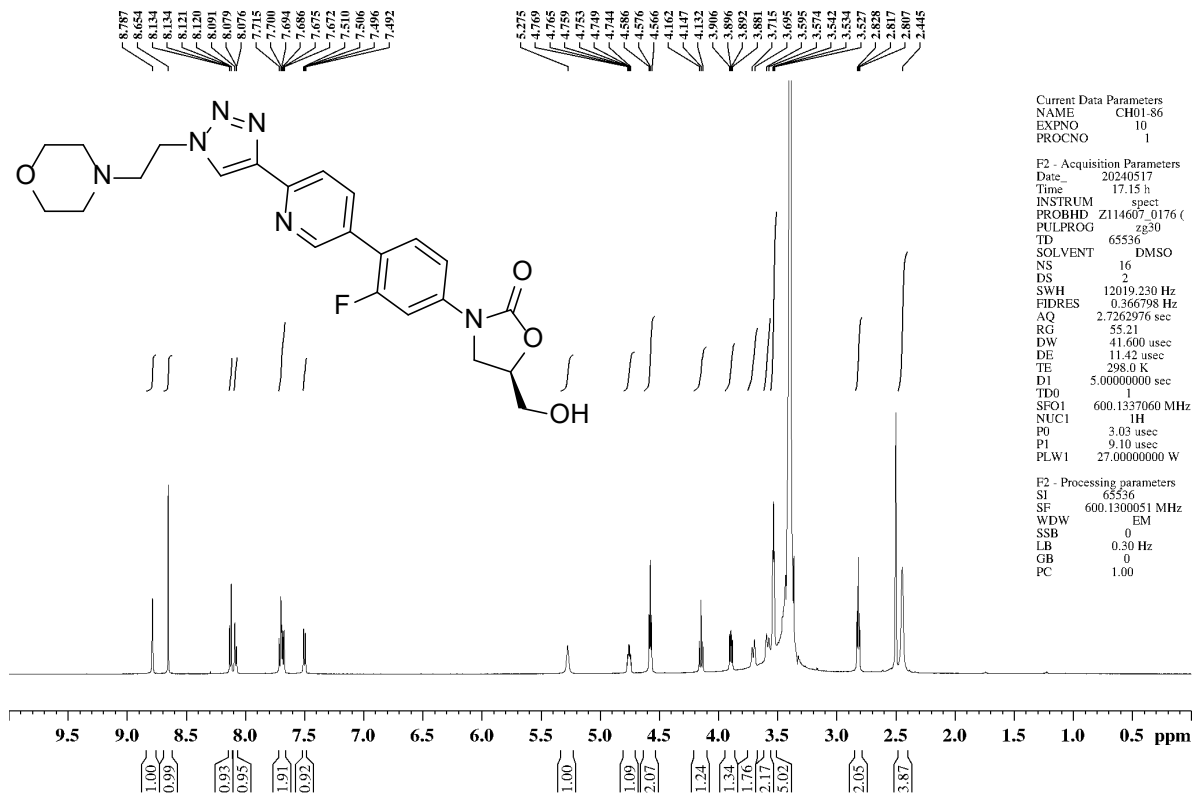

Current Data Parameters  
 NAME CH01-86  
 EXPNO 10  
 PROCNO 1

F2 - Acquisition Parameters  
 Date\_ 20240517  
 Time 17.15 h  
 INSTRUM spect  
 PROBHD Z114607\_0176 ( )  
 PULPROG zg30  
 TD 65536  
 SOLVENT DMSO  
 NS 16  
 DS 2  
 SWH 12019.230 Hz  
 FIDRES 0.366798 Hz  
 AQ 2.7262976 sec  
 RG 55.21  
 DW 41.600 usec  
 DE 11.42 usec  
 TE 298.0 K  
 D1 5.00000000 sec  
 TD0 1  
 SFO1 600.1337060 MHz  
 NUC1 1H  
 P0 3.03 usec  
 P1 9.10 usec  
 PLW1 27.00000000 W

F2 - Processing parameters  
 SI 65536  
 SF 600.1300051 MHz  
 WDW EM  
 SSB 0  
 LB 0.30 Hz  
 GB 0  
 PC 1.00

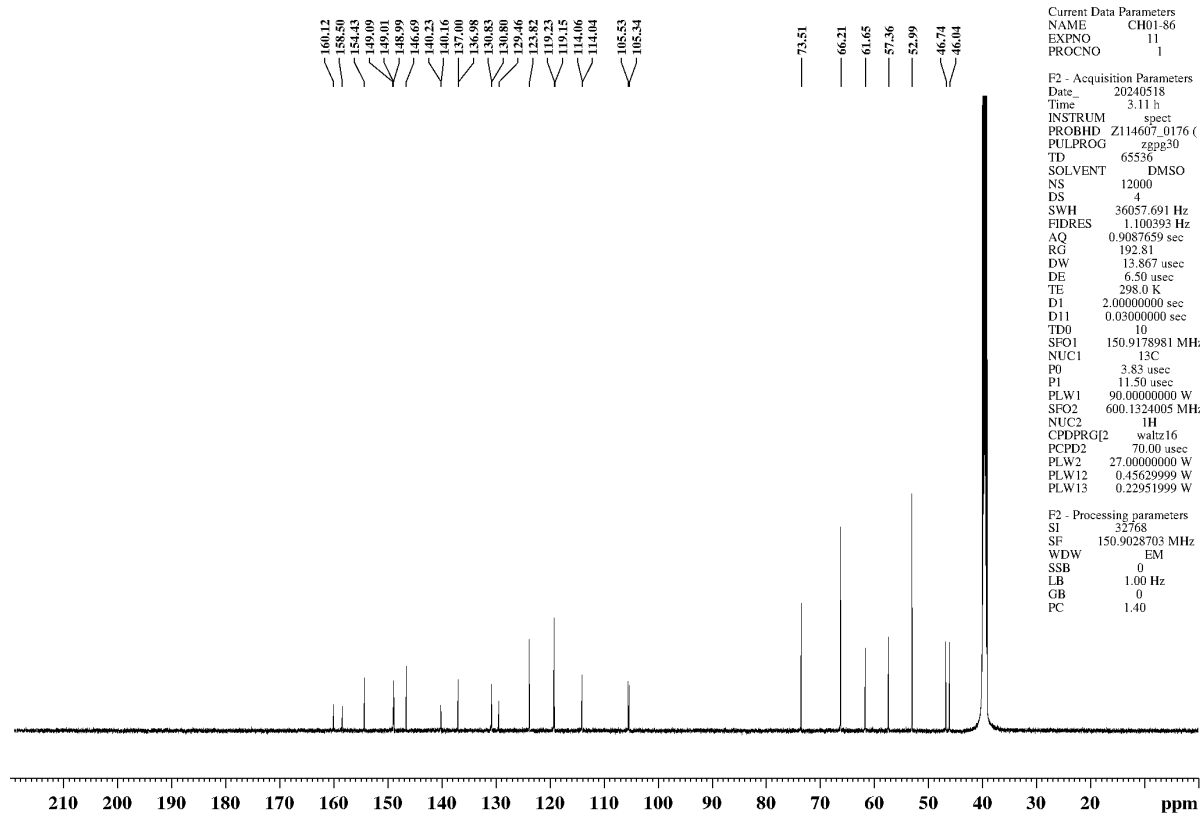

Current Data Parameters  
 NAME CH01-86  
 EXPNO 11  
 PROCNO 1

F2 - Acquisition Parameters  
 Date\_ 20240518  
 Time 3.11 h  
 INSTRUM spect  
 PROBHD Z114607\_0176 ( )  
 PULPROG zgpg30  
 TD 65536  
 SOLVENT DMSO  
 NS 12000  
 DS 4  
 SWH 36057.691 Hz  
 FIDRES 1.100393 Hz  
 AQ 0.9087659 sec  
 RG 192.81  
 DW 13.867 usec  
 DE 6.50 usec  
 TE 298.0 K  
 D1 2.00000000 sec  
 D11 0.03000000 sec  
 TD0 10  
 SFO1 150.9178981 MHz  
 NUC1 13C  
 P0 3.83 usec  
 P1 11.50 usec  
 PLW1 90.00000000 W  
 SFO2 600.1324005 MHz  
 NUC2 1H  
 CPDPRG2 waltz16  
 PCPD2 70.00 usec  
 PLW2 27.00000000 W  
 PLW12 0.45629999 W  
 PLW13 0.22951999 W

F2 - Processing parameters  
 SI 32768  
 SF 150.9028703 MHz  
 WDW EM  
 SSB 0  
 LB 1.00 Hz  
 GB 0  
 PC 1.40

# <sup>1</sup>H and <sup>13</sup>C NMR of Boc-protected 12 (600 MHz, DMSO-d<sub>6</sub>):

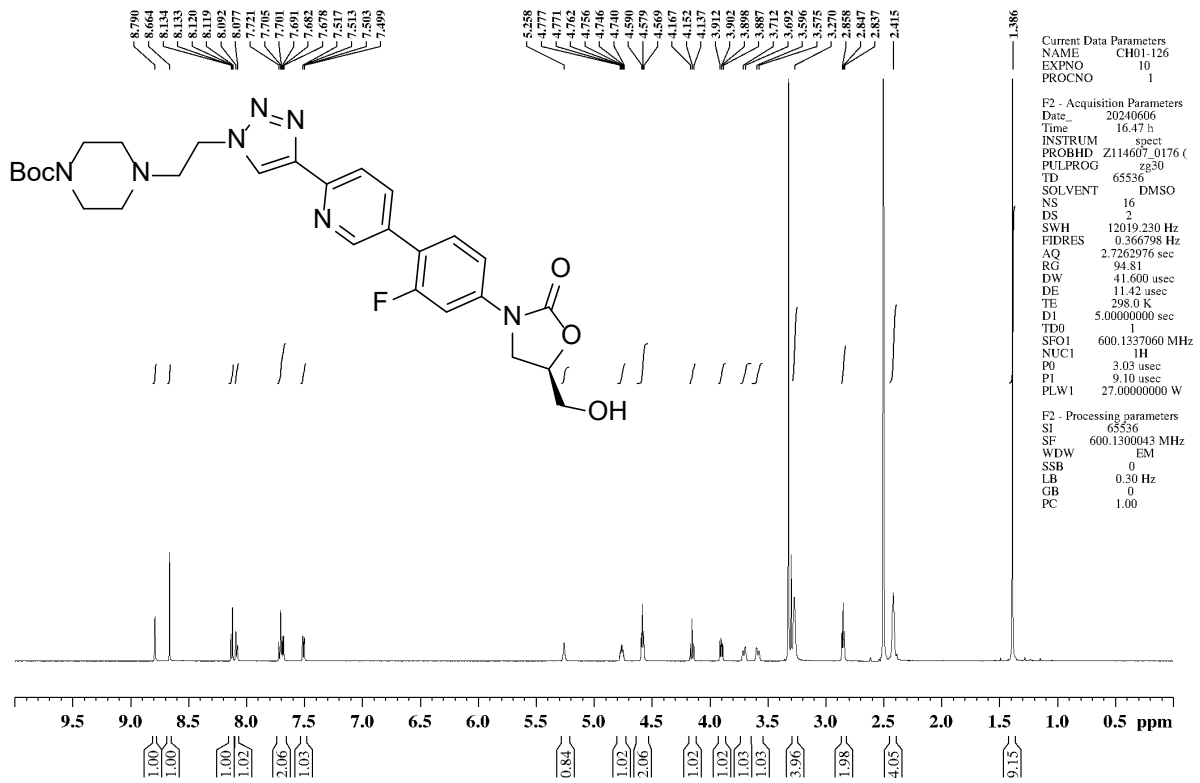

Current Data Parameters  
 NAME CH01-126  
 EXPNO 10  
 PROCNO 1

F2 - Acquisition Parameters  
 Date\_ 20240606  
 Time 16.47 h  
 INSTRUM spect  
 PROBHD Z114607\_0176 (C  
 PULPROG zg30  
 TD 65536  
 SOLVENT DMSO  
 NS 16  
 DS 2  
 SWH 12019.230 Hz  
 FIDRES 0.366798 Hz  
 AQ 2.7262976 sec  
 RG 94.81  
 DW 41.600 usec  
 DE 11.42 usec  
 TE 298.0 K  
 D1 5.00000000 sec  
 TD0 1  
 SFO1 600.1337060 MHz  
 NUC1 1H  
 P0 3.03 usec  
 P1 9.10 usec  
 PLW1 27.00000000 W

F2 - Processing parameters  
 SI 65536  
 SF 600.1300043 MHz  
 WDW EM  
 SSB 0  
 LB 0.30 Hz  
 GB 0  
 PC 1.00

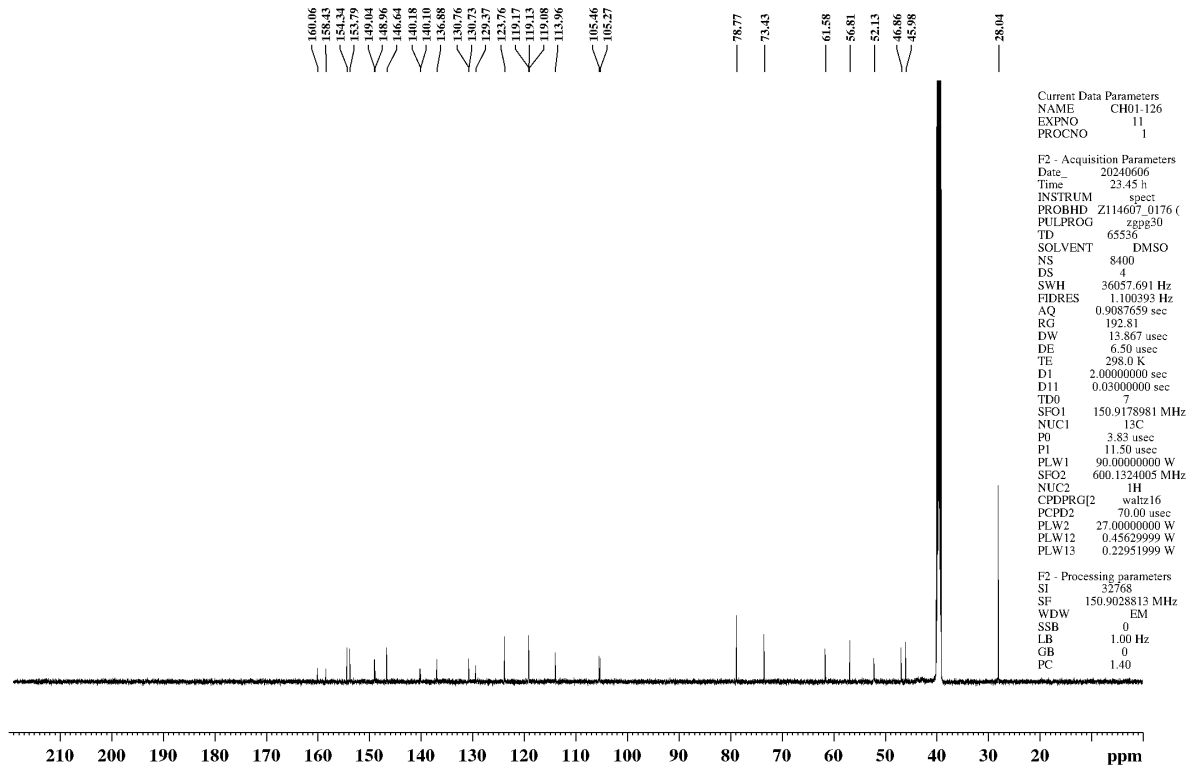

Current Data Parameters  
 NAME CH01-126  
 EXPNO 11  
 PROCNO 1

F2 - Acquisition Parameters  
 Date\_ 20240606  
 Time 23.45 h  
 INSTRUM spect  
 PROBHD Z114607\_0176 (C  
 PULPROG zgpg30  
 TD 65536  
 SOLVENT DMSO  
 NS 8400  
 DS 4  
 SWH 36057.691 Hz  
 FIDRES 1.100393 Hz  
 AQ 0.9087659 sec  
 RG 192.81  
 DW 13.867 usec  
 DE 6.50 usec  
 TE 298.0 K  
 D1 2.00000000 sec  
 D11 0.03000000 sec  
 TD0 7  
 SFO1 150.9178981 MHz  
 NUC1 13C  
 P0 3.83 usec  
 P1 11.50 usec  
 PLW1 90.00000000 W  
 SFO2 600.1324005 MHz  
 NUC2 1H  
 CPMPRG2 waltz16  
 PCPD2 70.00 usec  
 PLW2 27.00000000 W  
 PLW12 0.45629999 W  
 PLW13 0.22951999 W

F2 - Processing parameters  
 SI 32768  
 SF 150.9028813 MHz  
 WDW EM  
 SSB 0  
 LB 1.00 Hz  
 GB 0  
 PC 1.40

**<sup>1</sup>H and <sup>13</sup>C NMR of 12 (600 MHz, DMSO-d<sub>6</sub>):**

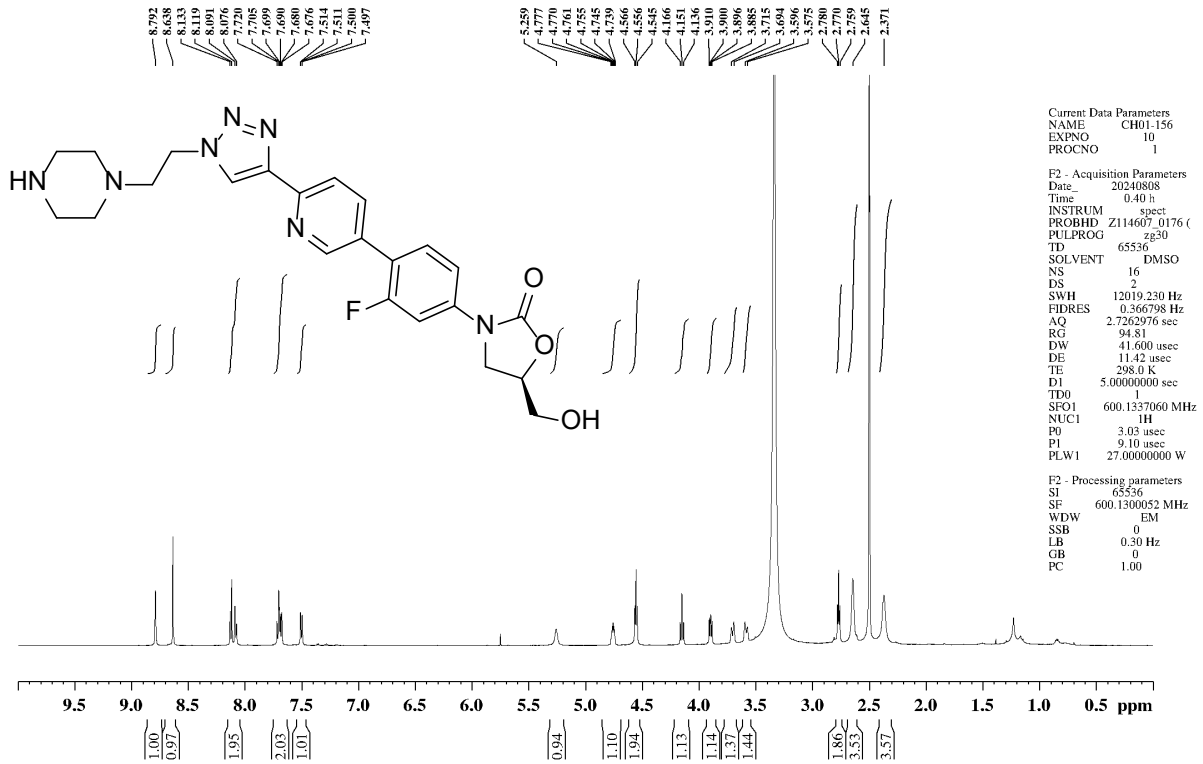

Current Data Parameters  
 NAME CH01-156  
 EXPNO 10  
 PROCNO 1

F2 - Acquisition Parameters  
 Date\_ 20240808  
 Time 0.40 h  
 INSTRUM spect  
 PROBHD Z114607\_0176 ( )  
 PULPROG zg30  
 TD 65536  
 SOLVENT DMSO  
 NS 16  
 DS 2  
 SWH 12019.230 Hz  
 FIDRES 0.366798 Hz  
 AQ 2.7262976 sec  
 RG 94.81  
 DW 41.600 usec  
 DE 11.42 usec  
 TE 298.0 K  
 D1 5.0000000 sec  
 TD0 1  
 SFO1 600.1337060 MHz  
 NUC1 1H  
 P0 3.03 usec  
 P1 9.10 usec  
 PLW1 27.00000000 W

F2 - Processing parameters  
 SI 65536  
 SF 600.1300052 MHz  
 WDW EM  
 SSB 0  
 LB 0.30 Hz  
 GB 0  
 PC 1.00

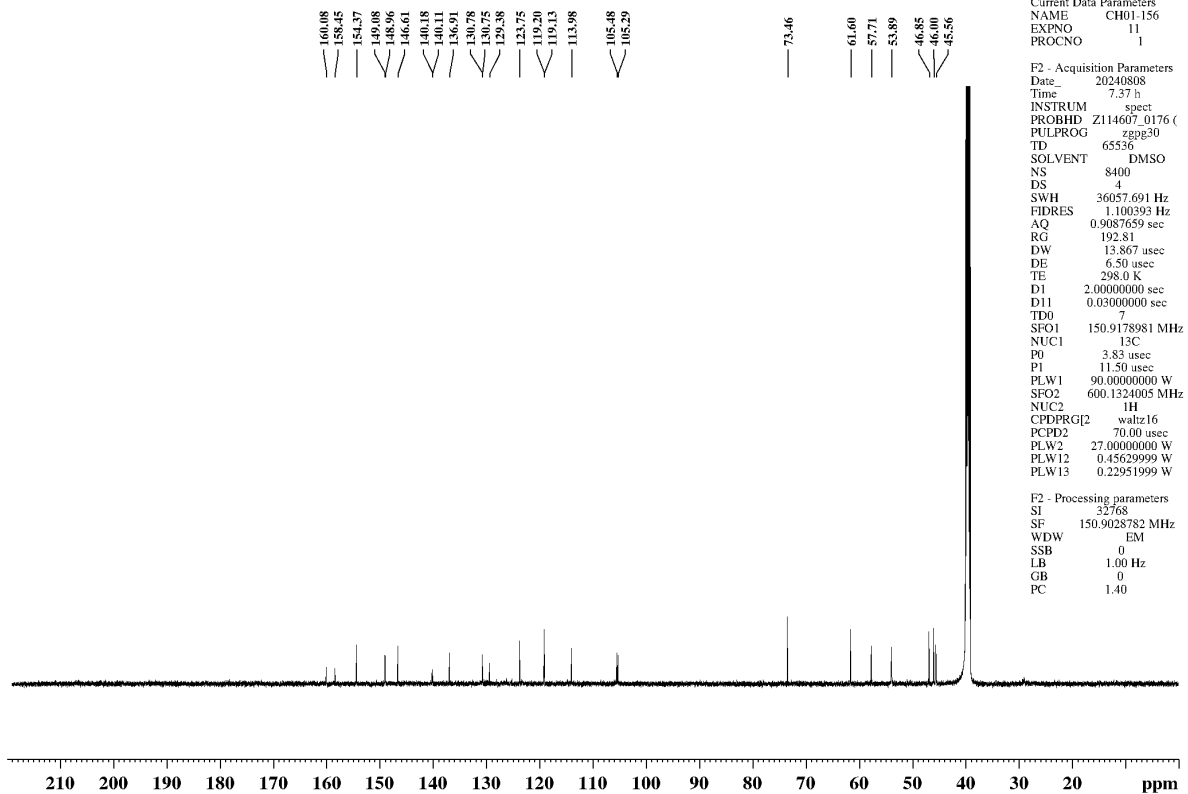

Current Data Parameters  
 NAME CH01-156  
 EXPNO 11  
 PROCNO 1

F2 - Acquisition Parameters  
 Date\_ 20240808  
 Time 7.37 h  
 INSTRUM spect  
 PROBHD Z114607\_0176 ( )  
 PULPROG zgpg30  
 TD 65536  
 SOLVENT DMSO  
 NS 8400  
 DS 4  
 SWH 36057.691 Hz  
 FIDRES 1.100393 Hz  
 AQ 0.9087659 sec  
 RG 192.81  
 DW 13.867 usec  
 DE 6.50 usec  
 TE 298.0 K  
 D1 2.0000000 sec  
 D11 0.0300000 sec  
 TD0 7  
 SFO1 150.9178981 MHz  
 NUC1 13C  
 P0 3.83 usec  
 P1 11.50 usec  
 PLW1 90.00000000 W  
 SFO2 600.1324005 MHz  
 NUC2 1H  
 CPDPRG2 waltz16  
 PCPD2 70.00 usec  
 PLW2 27.00000000 W  
 PLW12 0.45629999 W  
 PLW13 0.22951999 W

F2 - Processing parameters  
 SI 32768  
 SF 150.9028782 MHz  
 WDW EM  
 SSB 0  
 LB 1.00 Hz  
 GB 0  
 PC 1.40

# <sup>1</sup>H and <sup>13</sup>C NMR of 13 (600 MHz, DMSO-d<sub>6</sub>):

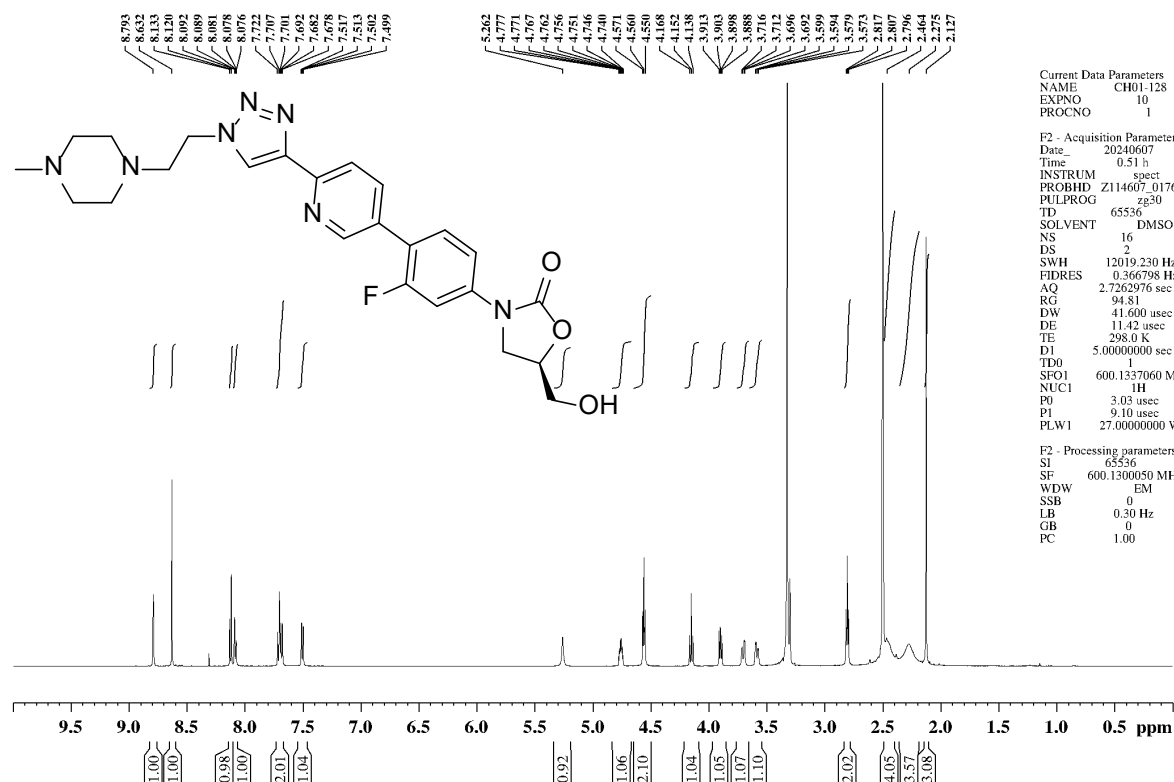

Current Data Parameters  
 NAME CH01-128  
 EXPNO 10  
 PROCNO 1

F2 - Acquisition Parameters  
 Date\_ 20240607  
 Time 0.51 h  
 INSTRUM spect  
 PROBHD Z114607\_0176 ( )  
 PULPROG zg30  
 TD 65536  
 SOLVENT DMSO  
 NS 2  
 DS 16  
 SWH 12019.230 Hz  
 FIDRES 0.366798 Hz  
 AQ 2.7262976 sec  
 RG 94.81  
 DW 41.600 usec  
 DE 11.42 usec  
 TE 298.0 K  
 D1 5.00000000 sec  
 TD0 1  
 SFO1 600.1337060 MHz  
 NUC1 <sup>1</sup>H  
 P0 3.03 usec  
 P1 9.10 usec  
 PLW1 27.00000000 W

F2 - Processing parameters  
 SI 65536  
 SF 600.1300050 MHz  
 WDW EM  
 SSB 0  
 LB 0.30 Hz  
 GB 0  
 PC 1.00

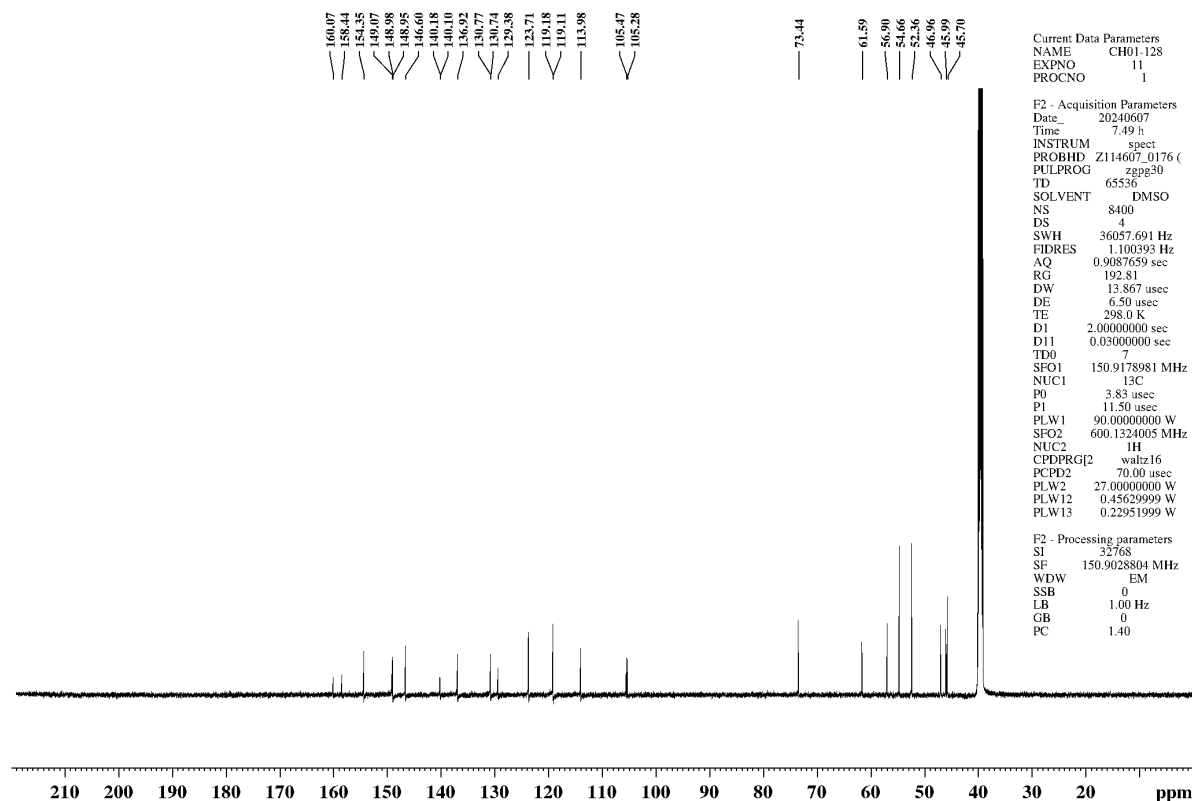

Current Data Parameters  
 NAME CH01-128  
 EXPNO 11  
 PROCNO 1

F2 - Acquisition Parameters  
 Date\_ 20240607  
 Time 7.49 h  
 INSTRUM spect  
 PROBHD Z114607\_0176 ( )  
 PULPROG zgpg30  
 TD 65536  
 SOLVENT DMSO  
 NS 8400  
 DS 4  
 SWH 36057.691 Hz  
 FIDRES 1.100593 Hz  
 AQ 0.9087659 sec  
 RG 192.81  
 DW 13.867 usec  
 DE 6.50 usec  
 TE 298.0 K  
 D1 2.00000000 sec  
 D11 0.03000000 sec  
 TD0 7  
 SFO1 150.9178981 MHz  
 NUC1 <sup>13</sup>C  
 P0 3.83 usec  
 P1 11.50 usec  
 PLW1 90.00000000 W  
 SFO2 600.1324005 MHz  
 NUC2 <sup>1</sup>H  
 CPDPRG2 walz16  
 PCPD2 70.00 usec  
 PLW2 27.00000000 W  
 PLW12 0.45629999 W  
 PLW13 0.22951999 W

F2 - Processing parameters  
 SI 3758  
 SF 150.9028804 MHz  
 WDW EM  
 SSB 0  
 LB 1.00 Hz  
 GB 0  
 PC 1.40

# <sup>1</sup>H and <sup>13</sup>C NMR of 14 (600 MHz, DMSO-d<sub>6</sub>):

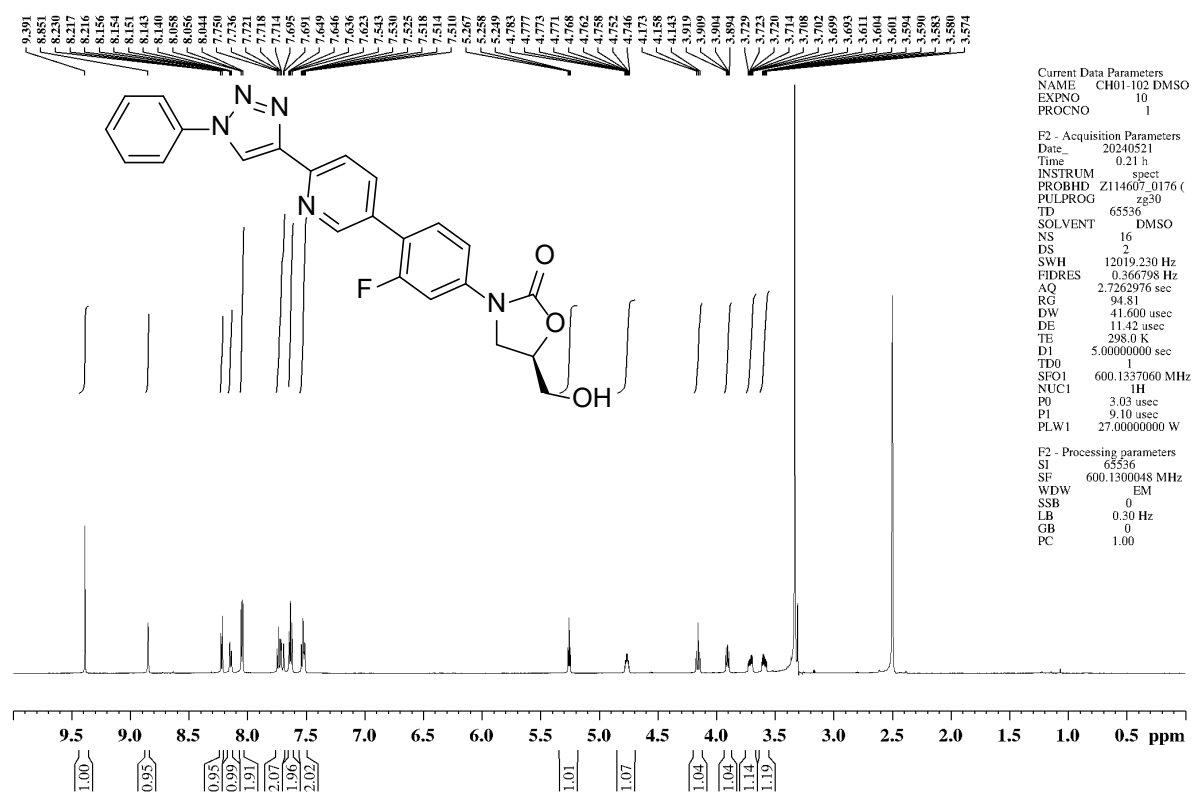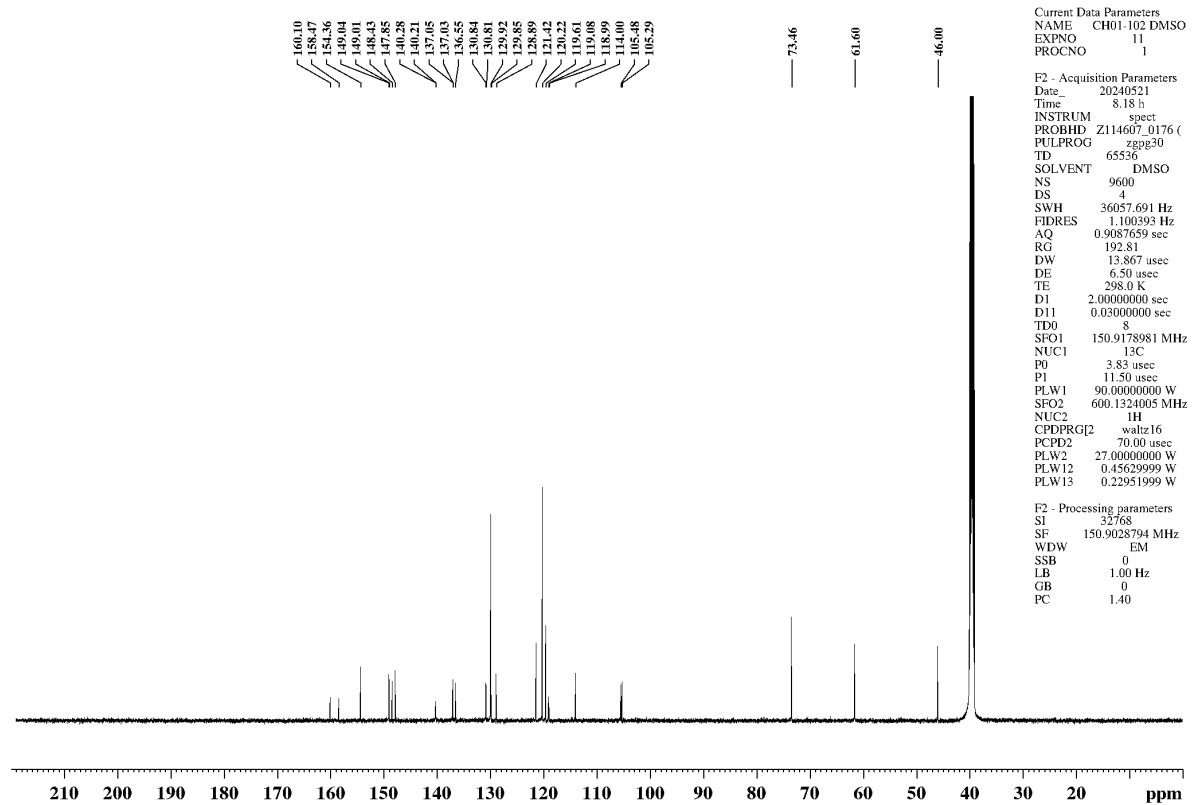

**<sup>1</sup>H and <sup>13</sup>C NMR of 15 (600 MHz, DMSO-d<sub>6</sub>):**

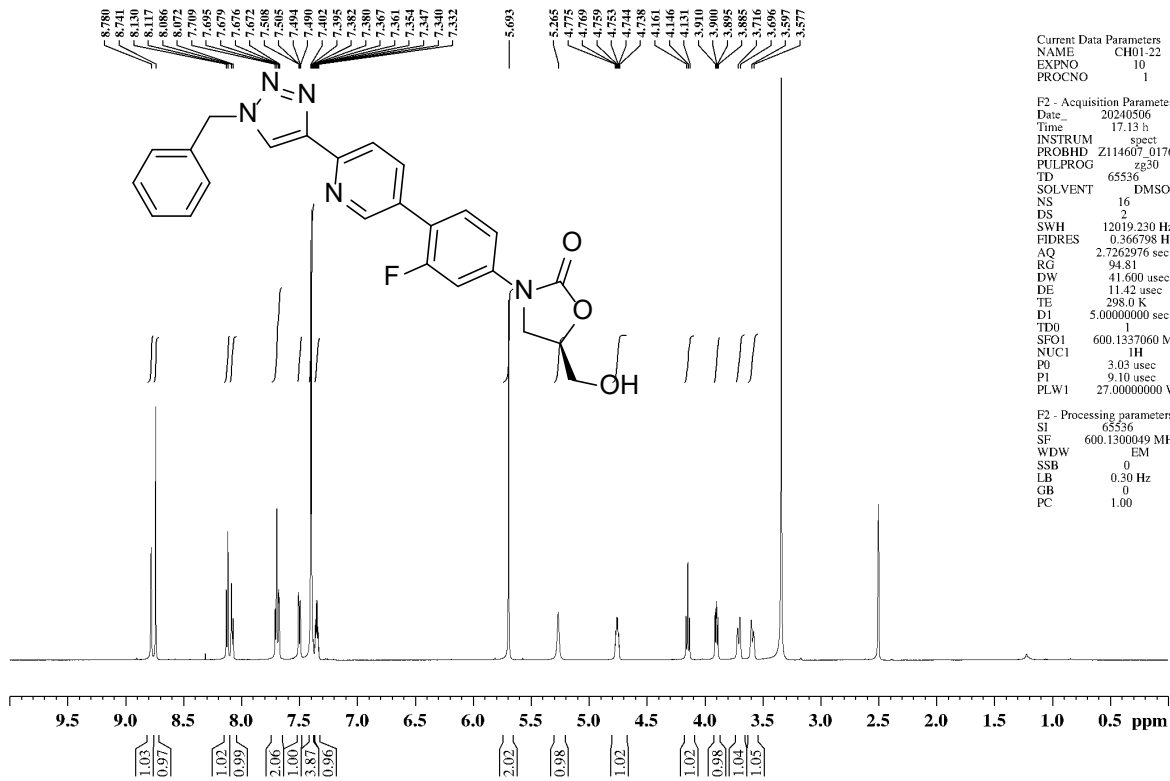

Current Data Parameters  
 NAME CH01-22  
 EXPNO 10  
 PROCNO 1

F2 - Acquisition Parameters  
 Date\_ 20240506  
 Time 17.13 h  
 INSTRUM spect  
 PROBHD Z114607\_0176 ( )  
 PULPROG zg30  
 TD 65536  
 SOLVENT DMSO  
 NS 16  
 DS 2  
 SWH 12019.230 Hz  
 FIDRES 0.366798 Hz  
 AQ 2.7262976 sec  
 RG 94.81  
 DW 41.600 usec  
 DE 11.42 usec  
 TE 298.0 K  
 D1 5.0000000 sec  
 TD0 1  
 SFO1 600.1337060 MHz  
 NUC1 1H  
 PO 3.03 usec  
 PI 9.10 usec  
 PLW1 27.0000000 W

F2 - Processing parameters  
 SI 65536  
 SF 600.1300049 MHz  
 WDW EM  
 SSB 0  
 LB 0.30 Hz  
 GB 0  
 PC 1.00

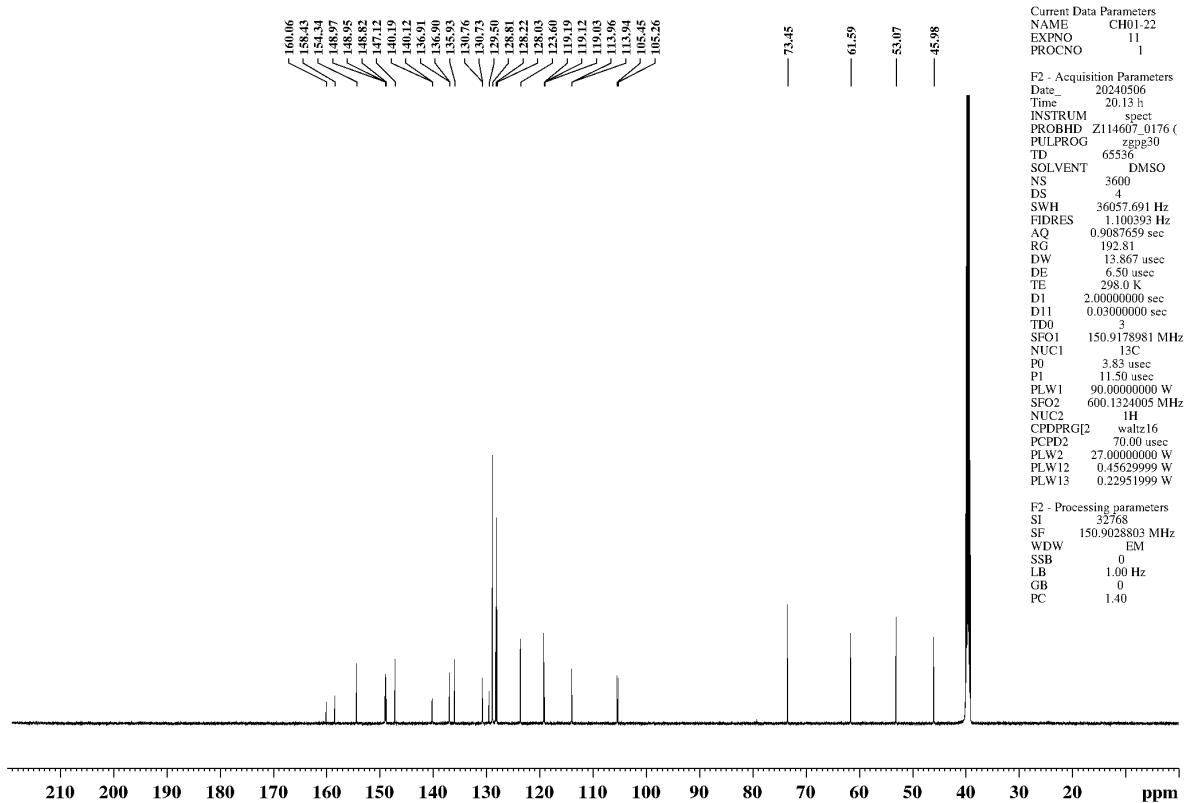

Current Data Parameters  
 NAME CH01-22  
 EXPNO 11  
 PROCNO 1

F2 - Acquisition Parameters  
 Date\_ 20240506  
 Time 20.13 h  
 INSTRUM spect  
 PROBHD Z114607\_0176 ( )  
 PULPROG zgpg30  
 TD 65536  
 SOLVENT DMSO  
 NS 3600  
 DS 4  
 SWH 36057.691 Hz  
 FIDRES 1.100393 Hz  
 AQ 0.9087659 sec  
 RG 192.81  
 DW 13.867 usec  
 DE 6.50 usec  
 TE 298.0 K  
 D1 2.0000000 sec  
 D11 0.0300000 sec  
 TD0 3  
 SFO1 150.9178981 MHz  
 NUC1 13C  
 PO 3.83 usec  
 PI 11.50 usec  
 PLW1 90.0000000 W  
 SFO2 600.1324005 MHz  
 NUC2 1H  
 CPDPRG2 walz16  
 PCPD2 70.00 usec  
 PLW2 27.0000000 W  
 PLW12 0.45629999 W  
 PLW13 0.22951999 W

F2 - Processing parameters  
 SI 2768  
 SF 150.9028803 MHz  
 WDW EM  
 SSB 0  
 LB 1.00 Hz  
 GB 0  
 PC 1.40

# <sup>1</sup>H and <sup>13</sup>C NMR of 16 (600 MHz, DMSO-d<sub>6</sub>):

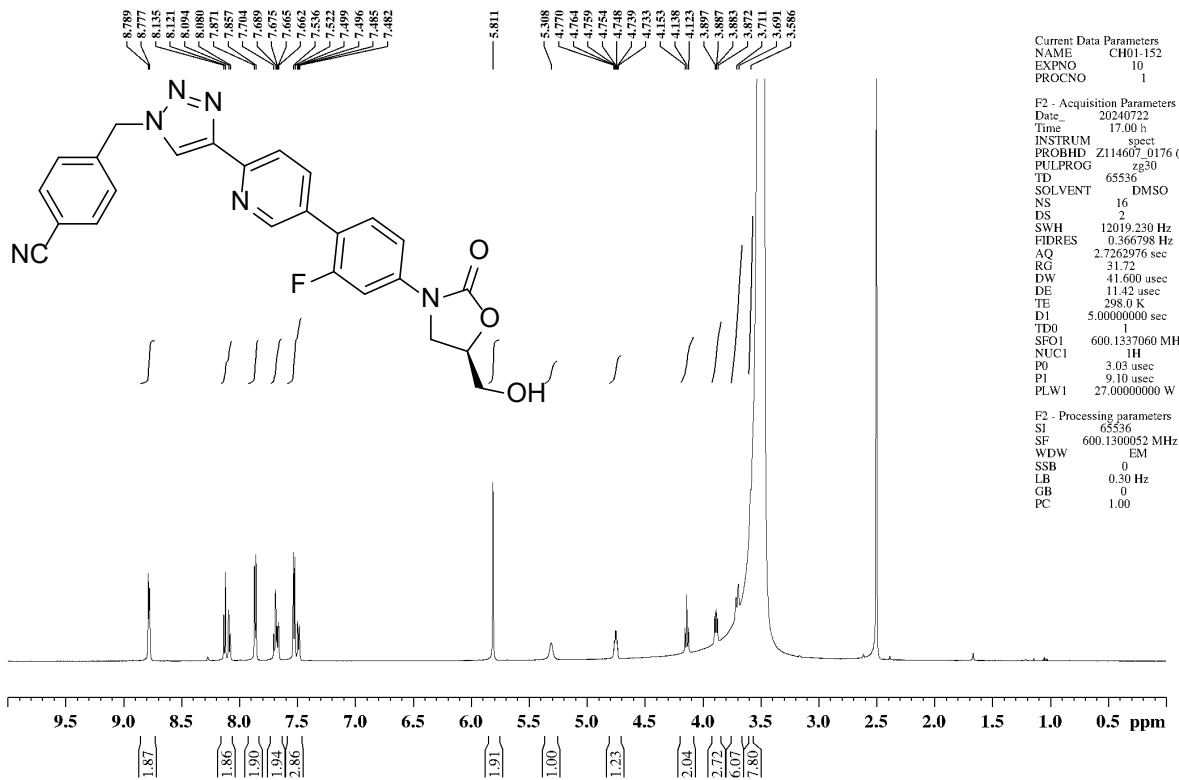

Current Data Parameters  
 NAME CH01-152  
 EXPNO 10  
 PROCNO 1

F2 - Acquisition Parameters  
 Date\_ 20240722  
 Time 17.00 h  
 INSTRUM spect  
 PROBHD Z114607\_0176 ( )  
 PULPROG zg30  
 TD 65536  
 SOLVENT DMSO  
 NS 16  
 DS 2  
 SWH 12019.230 Hz  
 FIDRES 0.366798 Hz  
 AQ 2.7262976 sec  
 RG 31.72  
 DW 41.600 usec  
 DE 11.42 usec  
 TE 298.0 K  
 D1 5.0000000 sec  
 TD0 1  
 SFO1 600.1337060 MHz  
 NUC1 <sup>1</sup>H  
 P0 3.03 usec  
 P1 9.10 usec  
 PLW1 27.00000000 W

F2 - Processing parameters  
 SI 65536  
 SF 600.1300052 MHz  
 WDW EM  
 SSB 0  
 LB 0.30 Hz  
 GB 0  
 PC 1.00

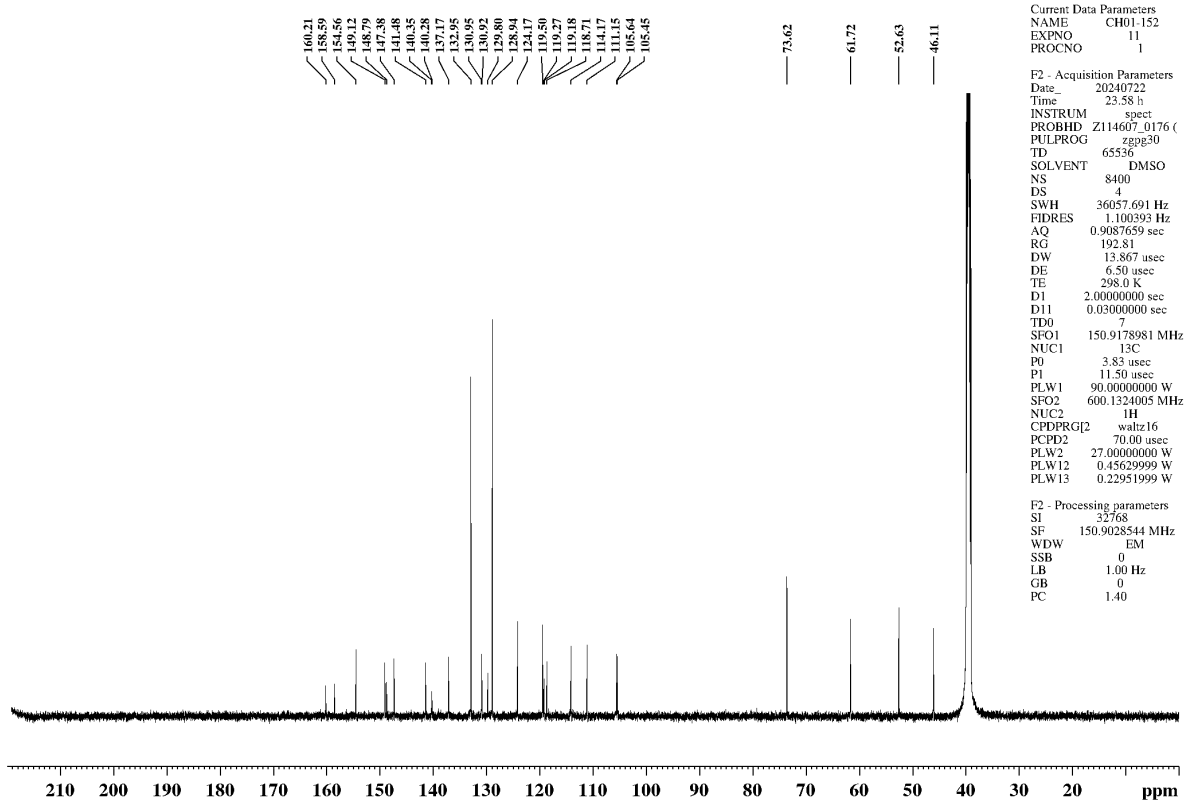

Current Data Parameters  
 NAME CH01-152  
 EXPNO 11  
 PROCNO 1

F2 - Acquisition Parameters  
 Date\_ 20240722  
 Time 23.58 h  
 INSTRUM spect  
 PROBHD Z114607\_0176 ( )  
 PULPROG zgpg30  
 TD 65536  
 SOLVENT DMSO  
 NS 8400  
 DS 4  
 SWH 36057.691 Hz  
 FIDRES 1.100393 Hz  
 AQ 0.9087659 sec  
 RG 192.81  
 DW 13.867 usec  
 DE 6.50 usec  
 TE 298.0 K  
 D1 2.0000000 sec  
 D11 0.03000000 sec  
 TD0 7  
 SFO1 150.9178981 MHz  
 NUC1 <sup>13</sup>C  
 P0 3.83 usec  
 P1 11.50 usec  
 PLW1 90.00000000 W  
 SFO2 600.1324005 MHz  
 NUC2 <sup>1</sup>H  
 CPDPRG2 waltz16  
 PCPD2 70.00 usec  
 PLW2 27.00000000 W  
 PLW12 0.45629999 W  
 PLW13 0.22951999 W

F2 - Processing parameters  
 SI 32768  
 SF 150.9028544 MHz  
 WDW EM  
 SSB 0  
 LB 1.00 Hz  
 GB 0  
 PC 1.40

# <sup>1</sup>H and <sup>13</sup>C NMR of 17 (500 MHz, DMSO-d<sub>6</sub>):

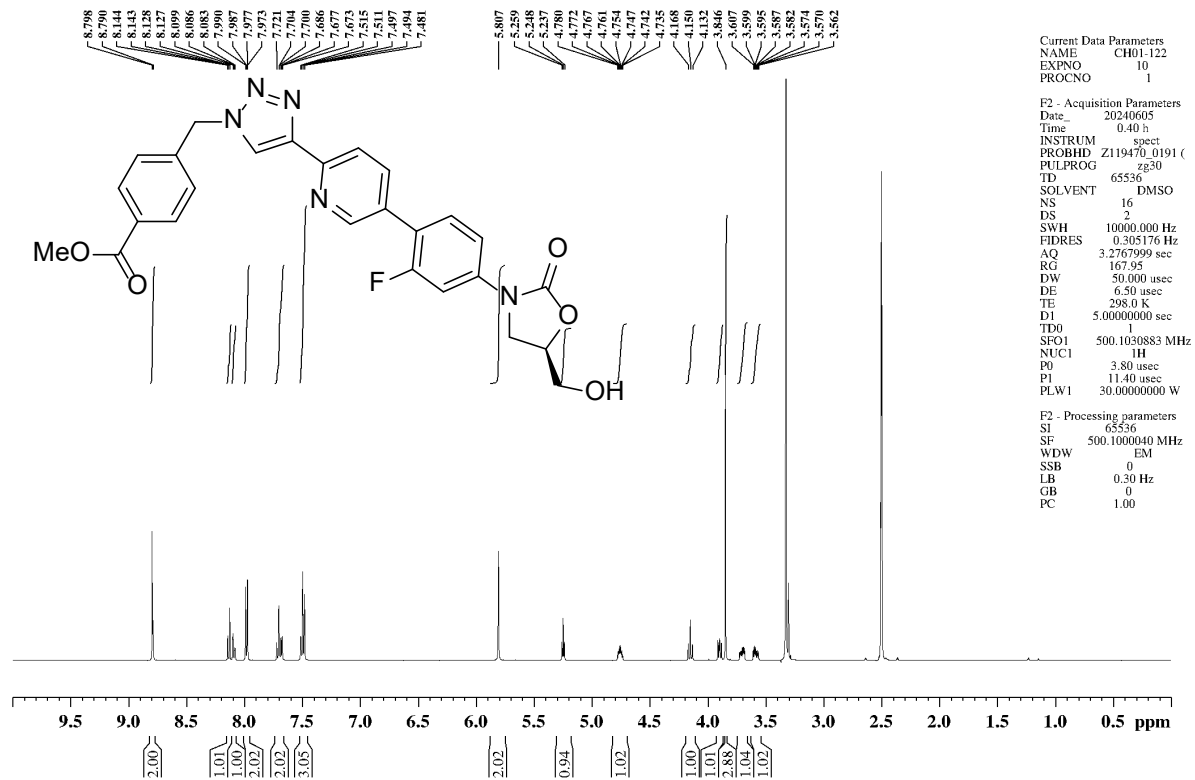

Current Data Parameters  
 NAME CH01-122  
 EXPNO 10  
 PROCNO 1

F2 - Acquisition Parameters  
 Date\_ 20240605  
 Time 0.40 h  
 INSTRUM spect  
 PROBHD Z119470\_0191 ( )  
 PULPROG zg30  
 TD 65536  
 SOLVENT DMSO  
 NS 16  
 DS 2  
 SWH 10000.000 Hz  
 FIDRES 0.305176 Hz  
 AQ 3.2767999 sec  
 RG 167.95  
 DW 50.000 usec  
 DE 6.50 usec  
 TE 298.0 K  
 D1 5.00000000 sec  
 TD0 1  
 SFO1 500.1030883 MHz  
 NUC1 <sup>1</sup>H  
 P0 3.80 usec  
 P1 11.40 usec  
 PLW1 30.00000000 W

F2 - Processing parameters  
 SI 65536  
 SF 500.1000040 MHz  
 WDW EM  
 SSB 0  
 LB 0.30 Hz  
 GB 0  
 PC 1.00

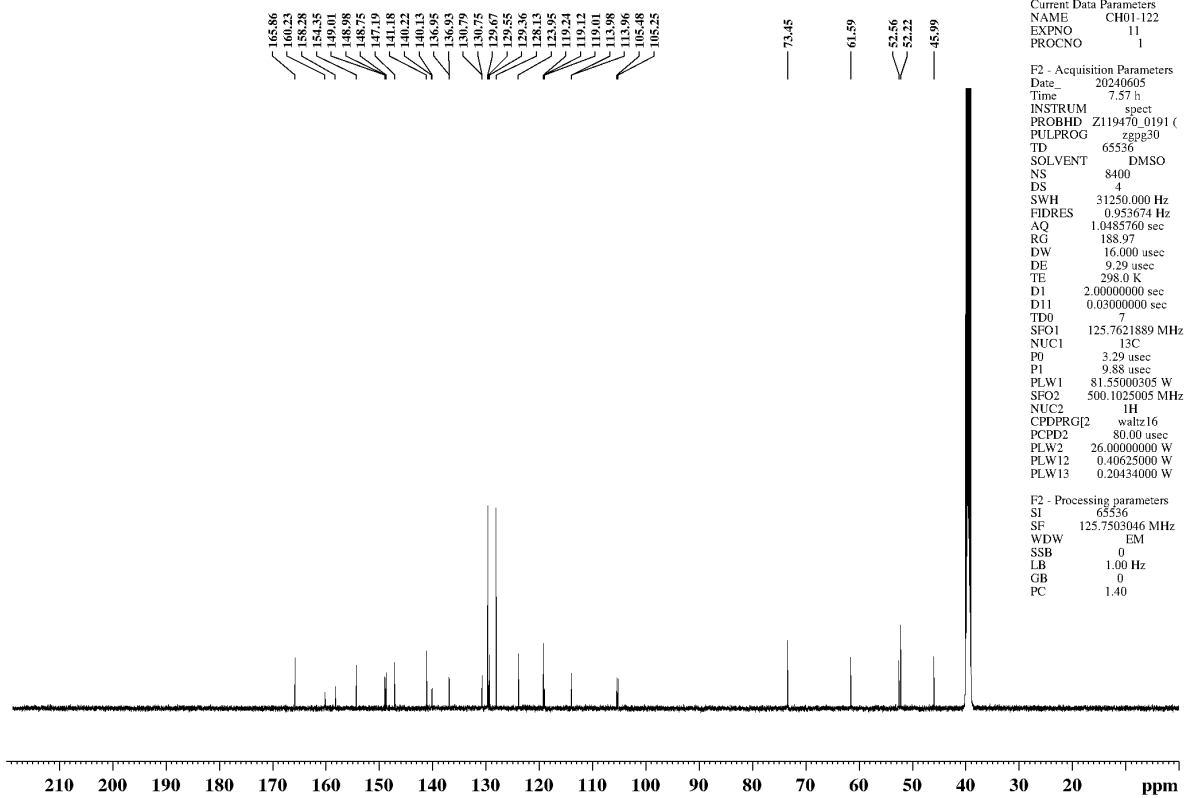

Current Data Parameters  
 NAME CH01-122  
 EXPNO 11  
 PROCNO 1

F2 - Acquisition Parameters  
 Date\_ 20240605  
 Time 7.57 h  
 INSTRUM spect  
 PROBHD Z119470\_0191 ( )  
 PULPROG zgpg30  
 TD 65536  
 SOLVENT DMSO  
 NS 8400  
 DS 4  
 SWH 31250.000 Hz  
 FIDRES 0.953674 Hz  
 AQ 1.0485760 sec  
 RG 188.97  
 DW 16.000 usec  
 DE 9.29 usec  
 TE 298.0 K  
 D1 2.00000000 sec  
 D11 0.03000000 sec  
 TD0 7  
 SFO1 125.7621889 MHz  
 NUC1 <sup>13</sup>C  
 P0 3.29 usec  
 P1 9.88 usec  
 PLW1 81.55000305 W  
 SFO2 500.1025005 MHz  
 NUC2 <sup>1</sup>H  
 CPDPRG2 waltz16  
 PCPD2 80.00 usec  
 PLW2 26.00000000 W  
 PLW12 0.40625000 W  
 PLW13 0.20434000 W

F2 - Processing parameters  
 SI 65536  
 SF 125.7503046 MHz  
 WDW EM  
 SSB 0  
 LB 1.00 Hz  
 GB 0  
 PC 1.40

**<sup>1</sup>H and <sup>13</sup>C NMR of 18 (400 MHz, DMSO-d<sub>6</sub>):**

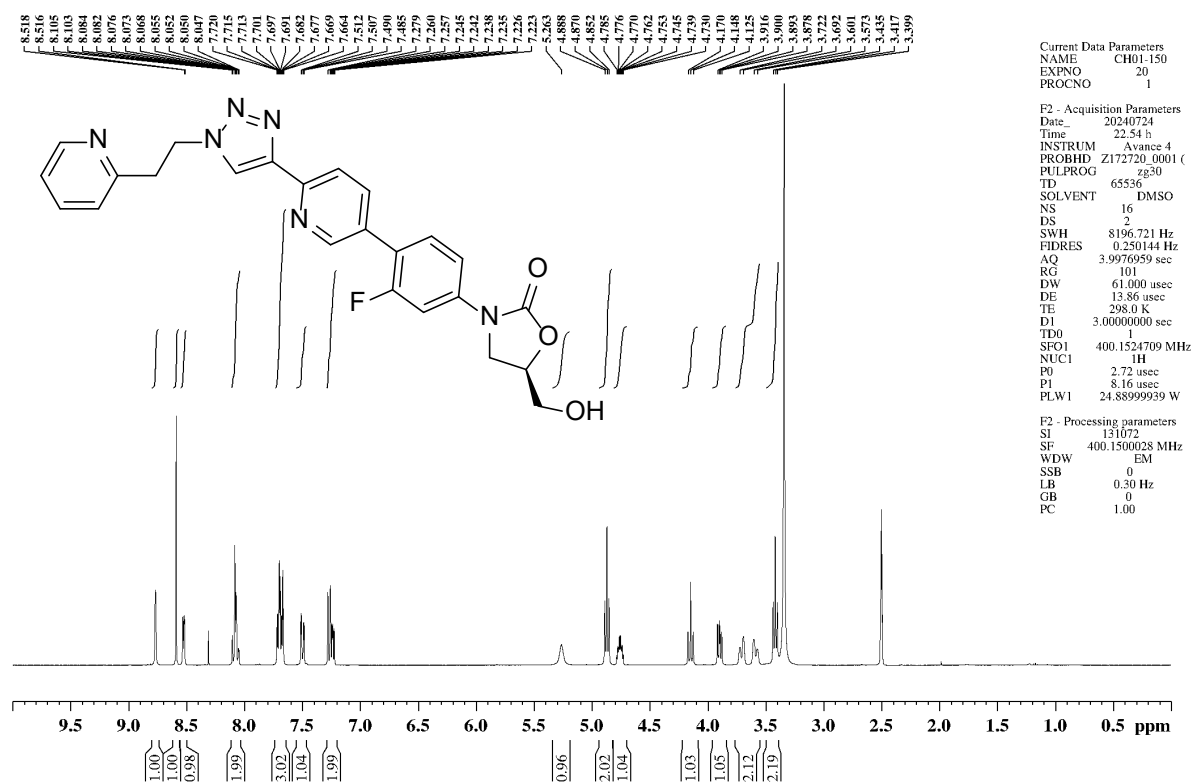

Current Data Parameters  
 NAME CH01-150  
 EXPNO 20  
 PROCNO 1

F2 - Acquisition Parameters  
 Date\_ 20240724  
 Time 22.54 h  
 INSTRUM Avance 4  
 PROBHD Z172720\_0001 (Zg30)  
 PULPROG zg30  
 TD 65536  
 SOLVENT DMSO  
 NS 16  
 DS 2  
 SWH 8196.721 Hz  
 FIDRES 0.250144 Hz  
 AQ 3.9976959 sec  
 RG 101  
 DW 61.000 usec  
 DE 13.86 usec  
 TE 298.0 K  
 D1 3.0000000 sec  
 TD0 1  
 SFO1 400.1524709 MHz  
 NUC1 1H  
 P0 2.72 usec  
 P1 8.16 usec  
 PLW1 24.88999939 W

F2 - Processing parameters  
 SI 131072  
 SF 400.1500028 MHz  
 WDW EM  
 SSB 0  
 LB 0.30 Hz  
 GB 0  
 PC 1.00

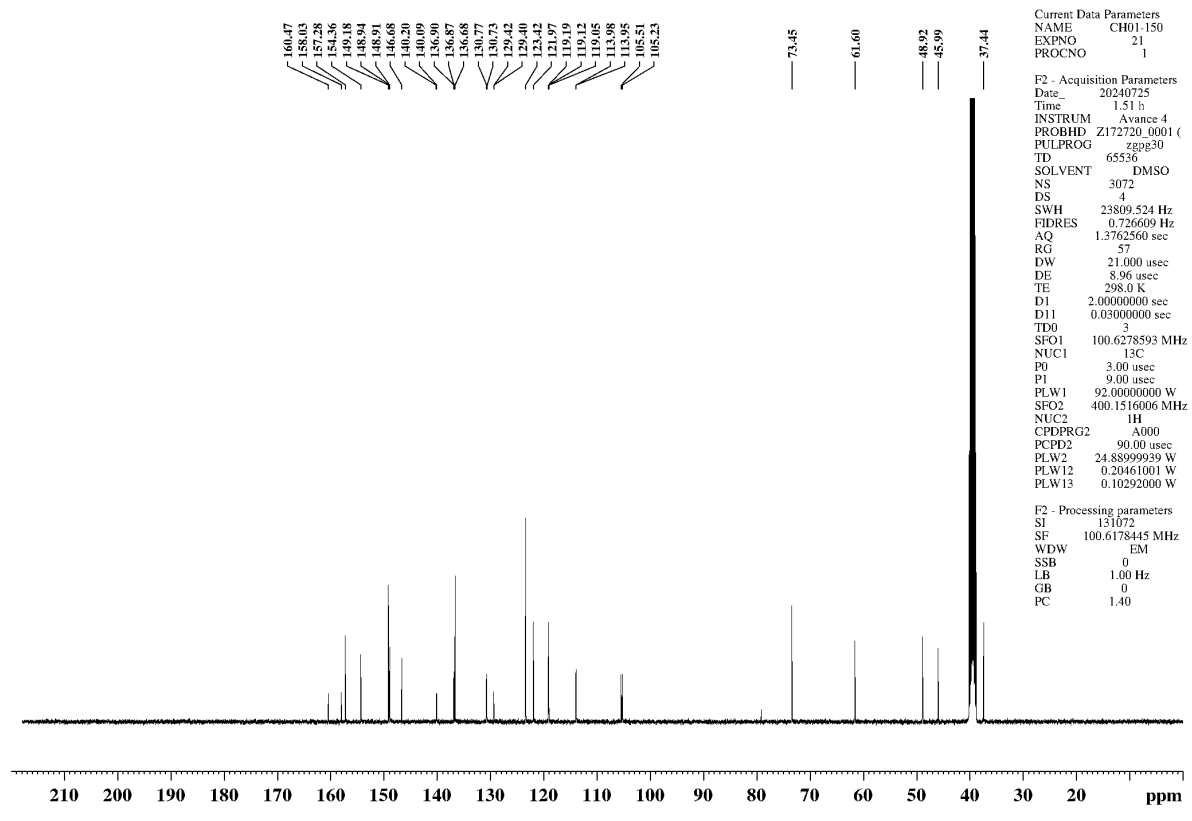

Current Data Parameters  
 NAME CH01-150  
 EXPNO 21  
 PROCNO 1

F2 - Acquisition Parameters  
 Date\_ 20240725  
 Time 1.51 h  
 INSTRUM Avance 4  
 PROBHD Z172720\_0001 (Zg30)  
 PULPROG zg30  
 TD 65536  
 SOLVENT DMSO  
 NS 3072  
 DS 4  
 SWH 23809.524 Hz  
 FIDRES 0.726609 Hz  
 AQ 1.3762560 sec  
 RG 57  
 DW 21.000 usec  
 DE 8.96 usec  
 TE 298.0 K  
 D1 2.0000000 sec  
 D11 0.0300000 sec  
 TD0 3  
 SFO1 100.6278593 MHz  
 NUC1 13C  
 P0 3.00 usec  
 P1 9.00 usec  
 PLW1 92.00000000 W  
 SFO2 400.1516006 MHz  
 NUC2 1H  
 CPDPRG2 A000  
 PCPD2 90.00 usec  
 PLW2 24.88999939 W  
 PLW12 0.20461001 W  
 PLW13 0.10292000 W

F2 - Processing parameters  
 SI 131072  
 SF 100.6178445 MHz  
 WDW EM  
 SSB 0  
 LB 1.00 Hz  
 GB 0  
 PC 1.40

# <sup>1</sup>H and <sup>13</sup>C NMR of 19 (400 MHz, DMSO-d<sub>6</sub>):

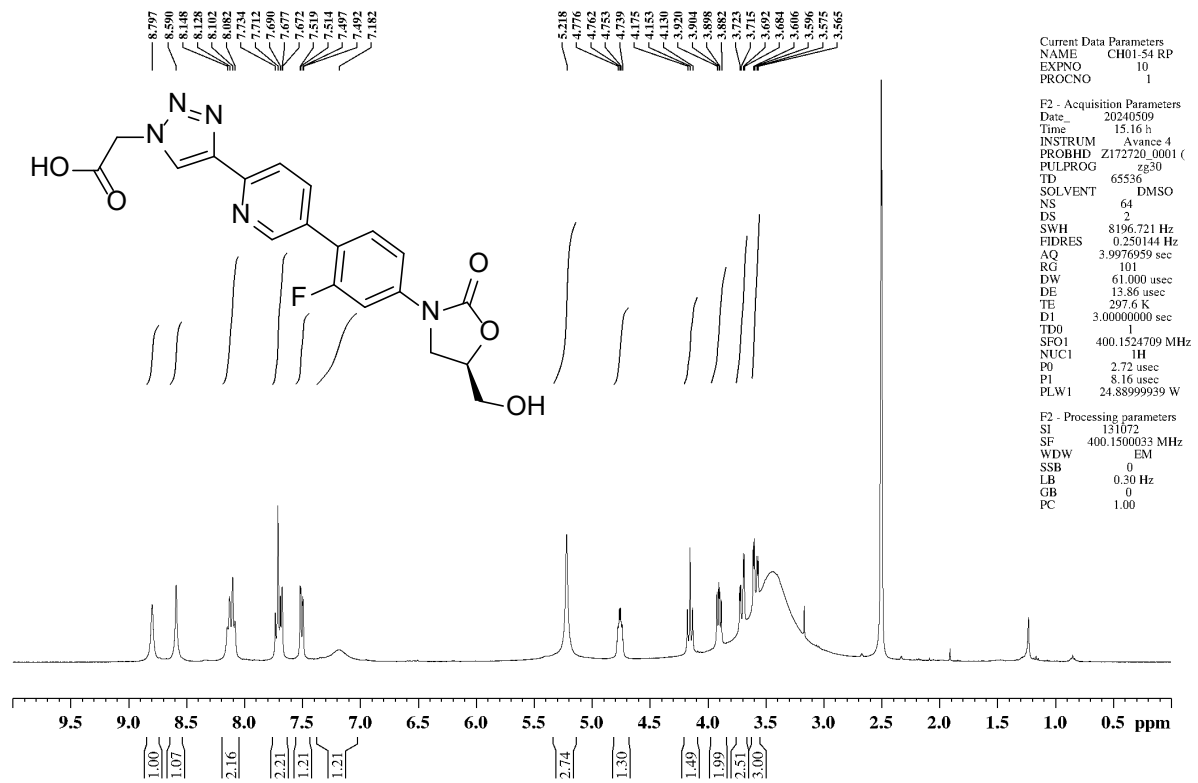

Current Data Parameters  
 NAME CH01-54 RP  
 EXPNO 10  
 PROCNO 1

F2 - Acquisition Parameters  
 Date\_ 20240509  
 Time 15.16 h  
 INSTRUM Avance 4  
 PROBHD Z172720\_0001 (Z  
 PULPROG zg30  
 TD 65536  
 SOLVENT DMSO  
 NS 64  
 DS 2  
 SWH 8196.721 Hz  
 FIDRES 0.250144 Hz  
 AQ 3.9976959 sec  
 RG 101  
 DW 61.000 usec  
 DE 13.86 usec  
 TE 297.6 K  
 D1 3.00000000 sec  
 TD0 1  
 SFO1 400.1524709 MHz  
 NUC1 <sup>1</sup>H  
 P0 2.72 usec  
 P1 8.16 usec  
 PLW1 24.88999939 W

F2 - Processing parameters  
 SI 131072  
 SF 400.1500033 MHz  
 WDW EM  
 SSB 0  
 LB 0.30 Hz  
 GB 0  
 PC 1.00

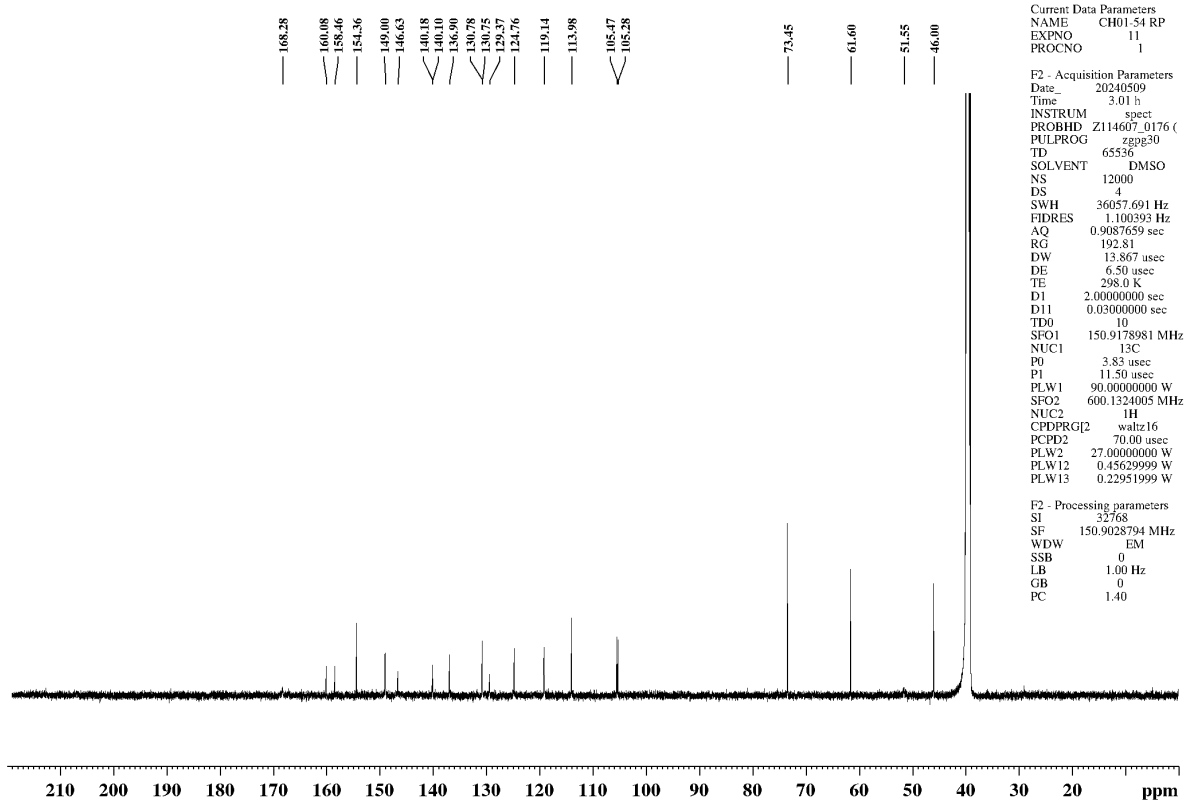

Current Data Parameters  
 NAME CH01-54 RP  
 EXPNO 11  
 PROCNO 1

F2 - Acquisition Parameters  
 Date\_ 20240509  
 Time 3.01 h  
 INSTRUM spect  
 PROBHD Z114607\_0176 (Z  
 PULPROG zgpg30  
 TD 65536  
 SOLVENT DMSO  
 NS 12000  
 DS 4  
 SWH 36057.691 Hz  
 FIDRES 1.100393 Hz  
 AQ 0.9087659 sec  
 RG 192.81  
 DW 13.867 usec  
 DE 6.50 usec  
 TE 298.0 K  
 D1 2.00000000 sec  
 D11 0.03000000 sec  
 TD0 10  
 SFO1 150.9178981 MHz  
 NUC1 <sup>13</sup>C  
 P0 3.83 usec  
 P1 11.50 usec  
 PLW1 90.00000000 W  
 SFO2 600.1324005 MHz  
 NUC2 <sup>1</sup>H  
 CPDPRG2 waltz16  
 PCPD2 70.00 usec  
 PLW2 27.00000000 W  
 PLW12 0.45629999 W  
 PLW13 0.22951999 W

F2 - Processing parameters  
 SI 32768  
 SF 150.9028794 MHz  
 WDW EM  
 SSB 0  
 LB 1.00 Hz  
 GB 0  
 PC 1.40

**<sup>1</sup>H and <sup>13</sup>C NMR of 20 (600 MHz, DMSO-d<sub>6</sub>):**

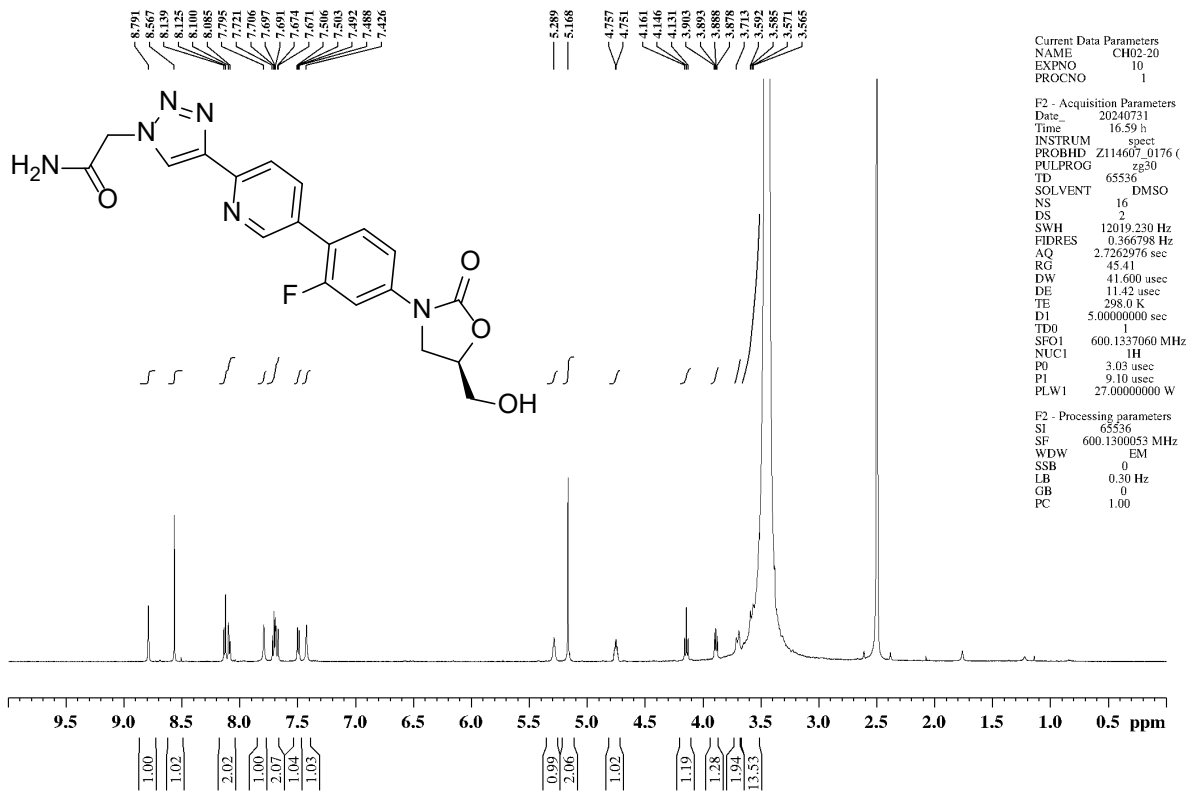

Current Data Parameters  
 NAME CH02-20  
 EXPNO 10  
 PROCNO 1

F2 - Acquisition Parameters  
 Date\_ 20240731  
 Time 16.59 h  
 INSTRUM spect  
 PROBHD Z114607\_0176 ( )  
 PULPROG zg30  
 TD 65536  
 SOLVENT DMSO  
 NS 16  
 DS 2  
 SWH 12019.230 Hz  
 FIDRES 0.366798 Hz  
 AQ 2.7262976 sec  
 RG 45.41  
 DW 41.600 usec  
 DE 11.42 usec  
 TE 298.0 K  
 D1 5.0000000 sec  
 TD0 1  
 SFO1 600.1337060 MHz  
 NUC1 <sup>1</sup>H  
 P0 3.03 usec  
 P1 9.10 usec  
 PLW1 27.00000000 W

F2 - Processing parameters  
 SI 65536  
 SF 600.1300053 MHz  
 WDW EM  
 SSB 0  
 LB 0.30 Hz  
 GB 0  
 PC 1.00

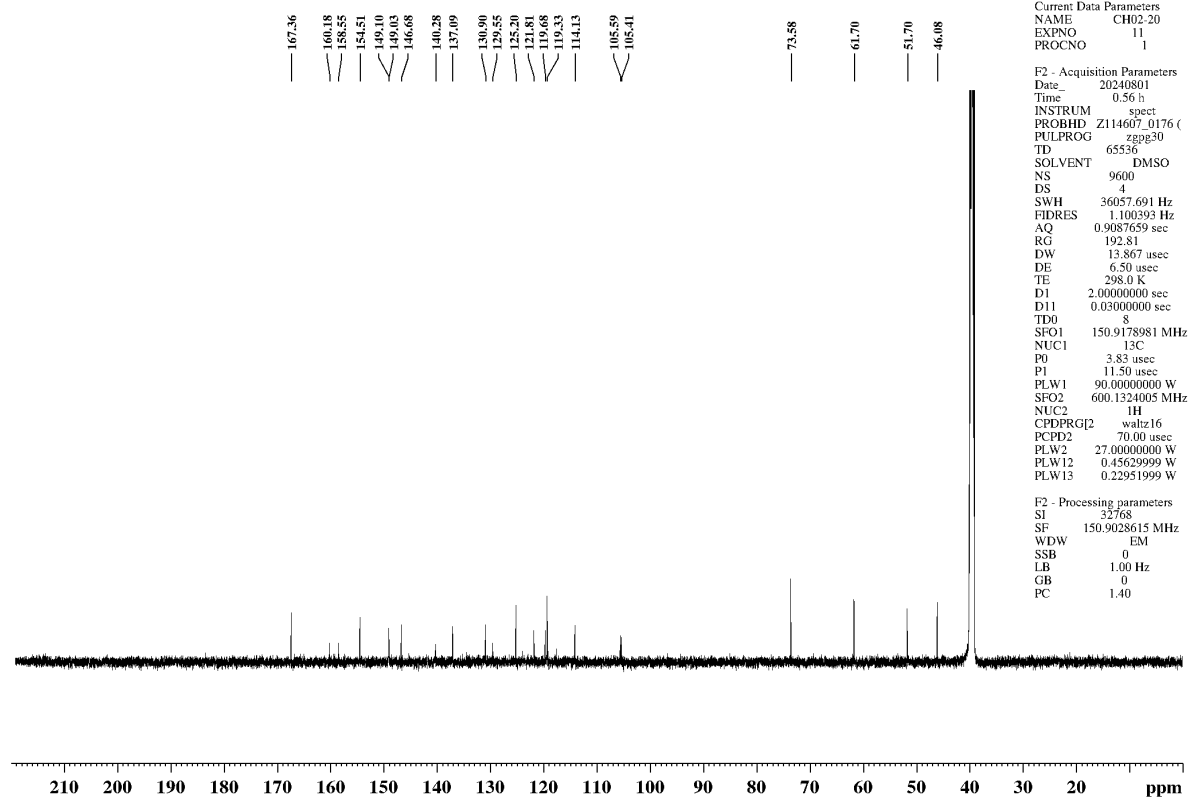

Current Data Parameters  
 NAME CH02-20  
 EXPNO 11  
 PROCNO 1

F2 - Acquisition Parameters  
 Date\_ 20240801  
 Time 0.56 h  
 INSTRUM spect  
 PROBHD Z114607\_0176 ( )  
 PULPROG zgpg30  
 TD 65536  
 SOLVENT DMSO  
 NS 9600  
 DS 4  
 SWH 36057.691 Hz  
 FIDRES 1.100893 Hz  
 AQ 0.9087659 sec  
 RG 192.81  
 DW 13.867 usec  
 DE 6.50 usec  
 TE 298.0 K  
 D1 2.0000000 sec  
 D11 0.03000000 sec  
 TD0 8  
 SFO1 150.9178981 MHz  
 NUC1 <sup>13</sup>C  
 P0 3.83 usec  
 P1 11.50 usec  
 PLW1 90.00000000 W  
 SFO2 600.1324005 MHz  
 NUC2 <sup>1</sup>H  
 CPDPRG2 walz16  
 PCPD2 70.00 usec  
 PLW2 27.00000000 W  
 PLW12 0.45629999 W  
 PLW13 0.22951999 W

F2 - Processing parameters  
 SI 32768  
 SF 150.9028615 MHz  
 WDW EM  
 SSB 0  
 LB 1.00 Hz  
 GB 0  
 PC 1.40

# <sup>1</sup>H and <sup>13</sup>C NMR of 21 (400 MHz, DMSO-d<sub>6</sub>):

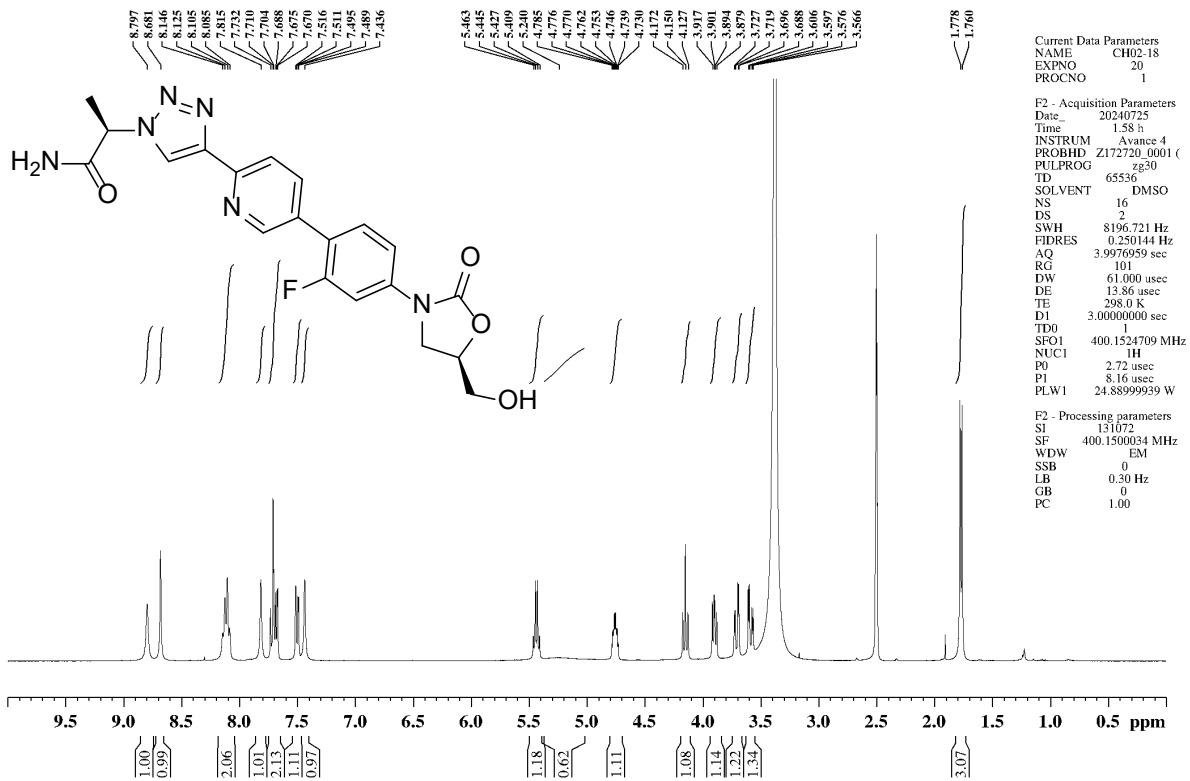

Current Data Parameters  
 NAME CH02-18  
 EXPNO 20  
 PROCNO 1

F2 - Acquisition Parameters  
 Date\_ 20240725  
 Time 1.58 h  
 INSTRUM Avance 4  
 PROBHD Z172720\_0001 (Z)  
 PULPROG zg30  
 TD 65536  
 SOLVENT DMSO  
 NS 16  
 DS 2  
 SWH 8196.721 Hz  
 FIDRES 0.250144 Hz  
 AQ 3.9976959 sec  
 RG 101  
 DW 61.000 usec  
 DE 13.86 usec  
 TE 298.0 K  
 D1 3.00000000 sec  
 TD0 1  
 SFO1 400.1524709 MHz  
 NUC1 1H  
 P0 2.72 usec  
 P1 8.16 usec  
 PLW1 24.88999939 W

F2 - Processing parameters  
 SI 131072  
 SF 400.1500034 MHz  
 WDW EM  
 SSB 0  
 LB 0.30 Hz  
 GB 0  
 PC 1.00

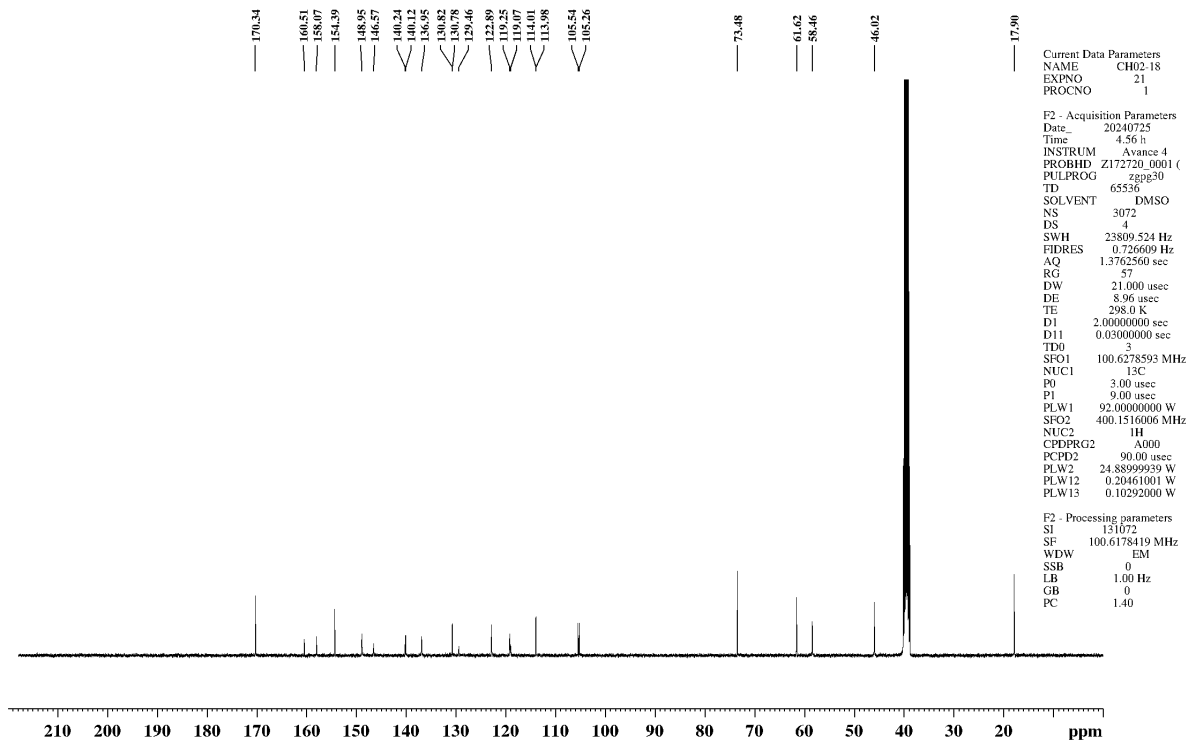

Current Data Parameters  
 NAME CH02-18  
 EXPNO 21  
 PROCNO 1

F2 - Acquisition Parameters  
 Date\_ 20240725  
 Time 4.56 h  
 INSTRUM Avance 4  
 PROBHD Z172720\_0001 (Z)  
 PULPROG zgpg30  
 TD 65536  
 SOLVENT DMSO  
 NS 3072  
 DS 4  
 SWH 23809.524 Hz  
 FIDRES 0.726609 Hz  
 AQ 1.3762500 sec  
 RG 57  
 DW 21.000 usec  
 DE 8.96 usec  
 TE 298.0 K  
 D1 2.00000000 sec  
 D11 0.03000000 sec  
 TD0 3  
 SFO1 100.6278593 MHz  
 NUC1 13C  
 P0 3.00 usec  
 P1 9.00 usec  
 PLW1 92.00000000 W  
 SFO2 400.1516006 MHz  
 NUC2 1H  
 CPDPRG2 A000  
 PCPD2 90.00 usec  
 PLW2 24.88999939 W  
 PLW12 0.20461001 W  
 PLW13 0.10292000 W

F2 - Processing parameters  
 SI 131072  
 SF 100.6178419 MHz  
 WDW EM  
 SSB 0  
 LB 1.00 Hz  
 GB 0  
 PC 1.40

# <sup>1</sup>H and <sup>13</sup>C NMR of 22 (600 MHz, DMSO-d<sub>6</sub>):

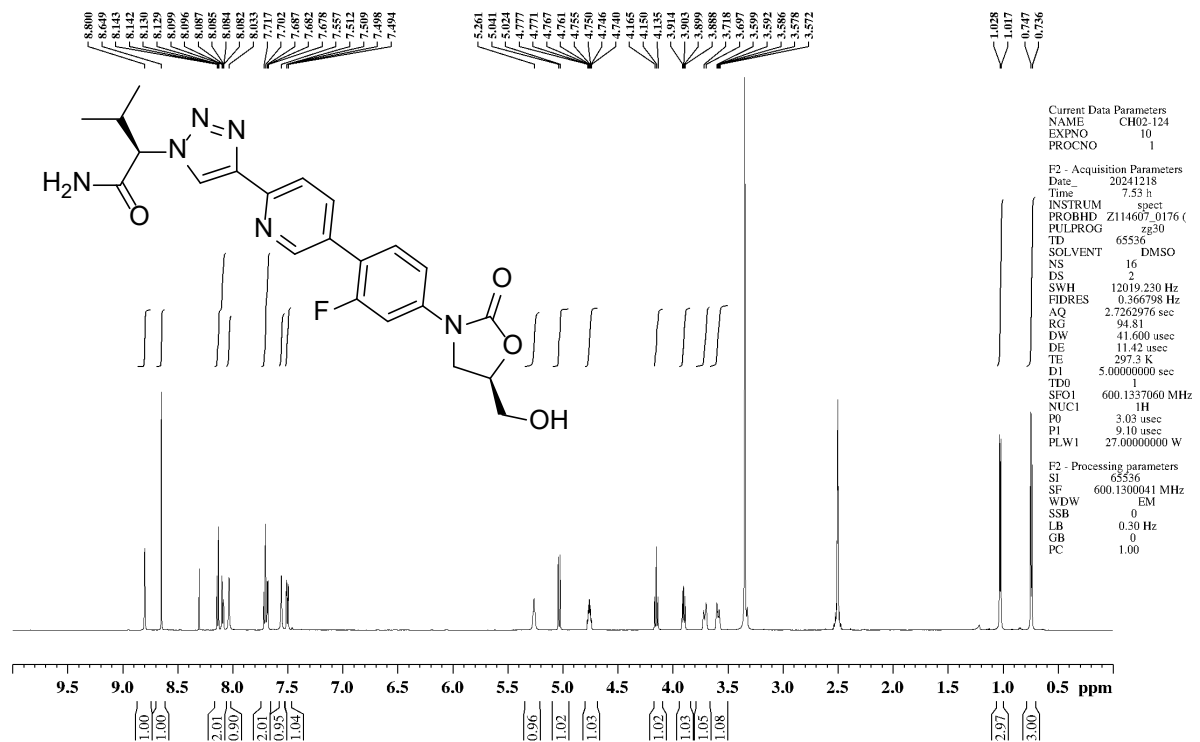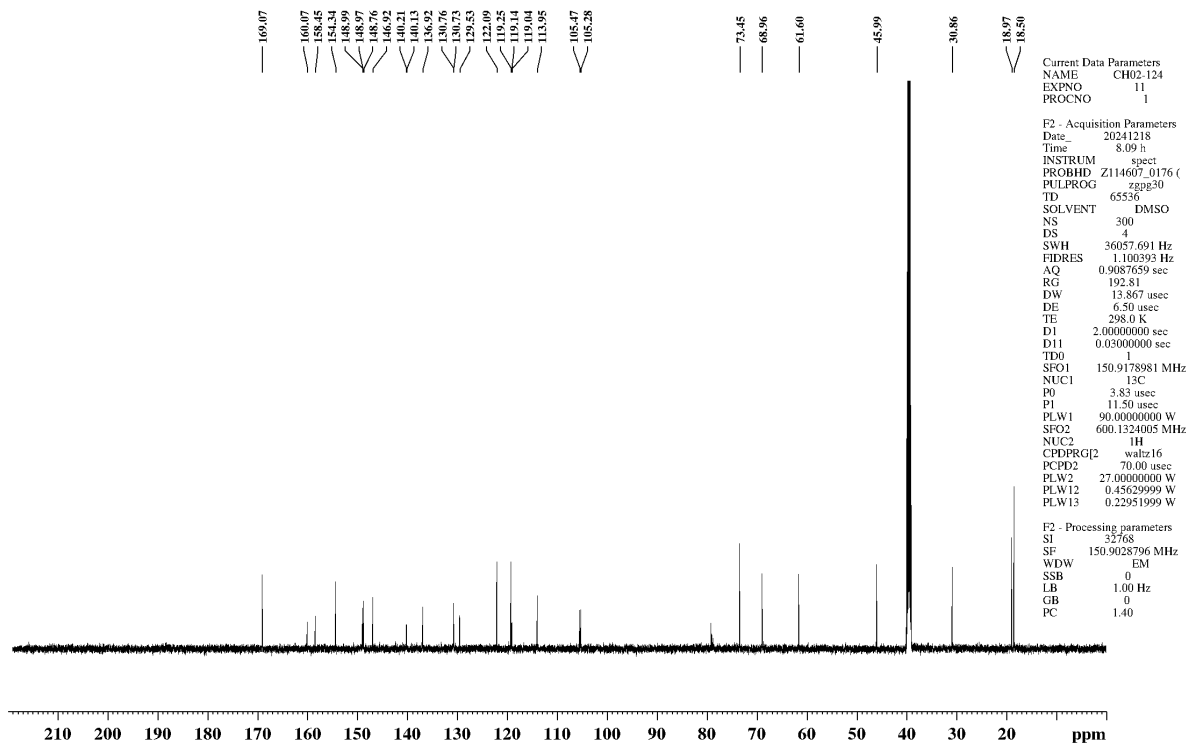

# <sup>1</sup>H and <sup>13</sup>C NMR of 23 (600 MHz, DMSO-d<sub>6</sub>):

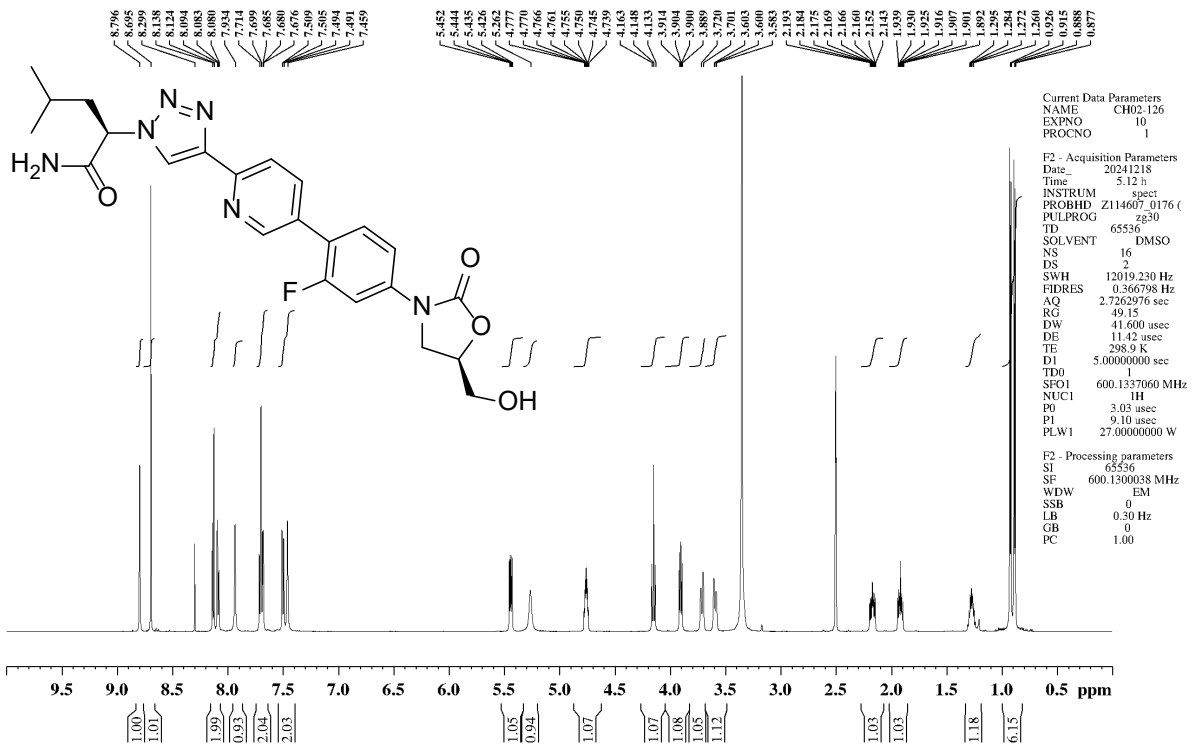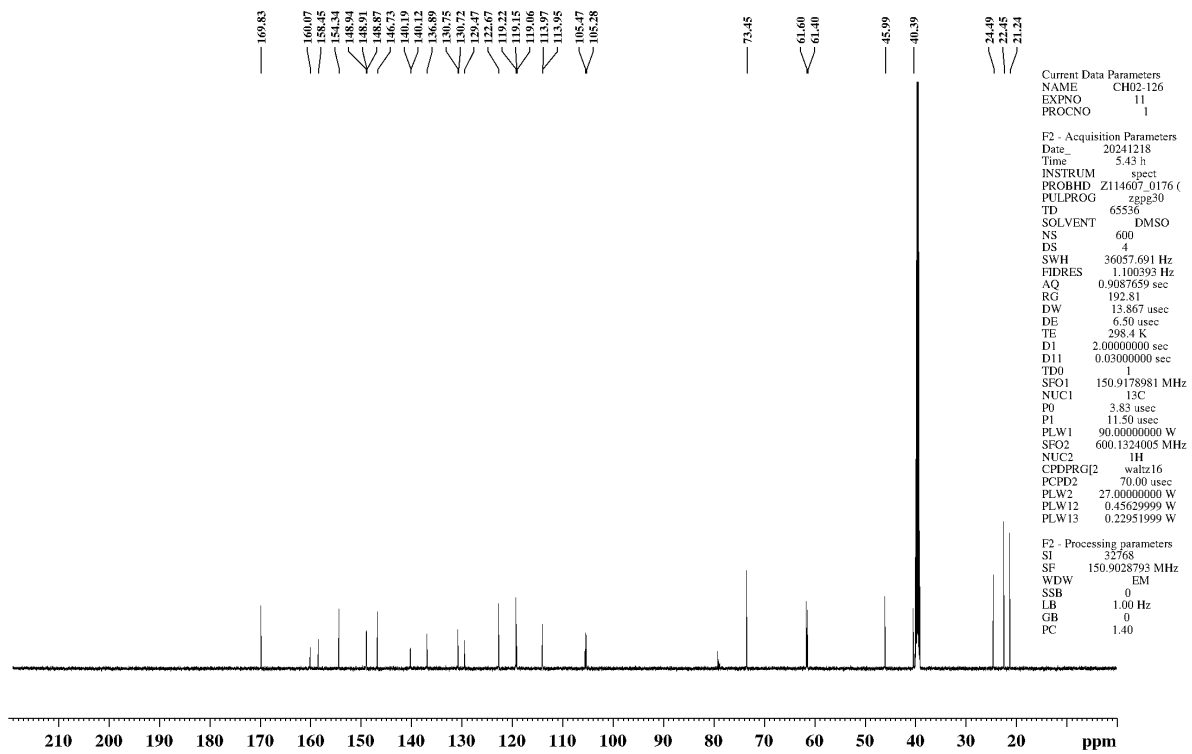

**<sup>1</sup>H and <sup>13</sup>C NMR of 24 (600 MHz, DMSO-d<sub>6</sub>):**

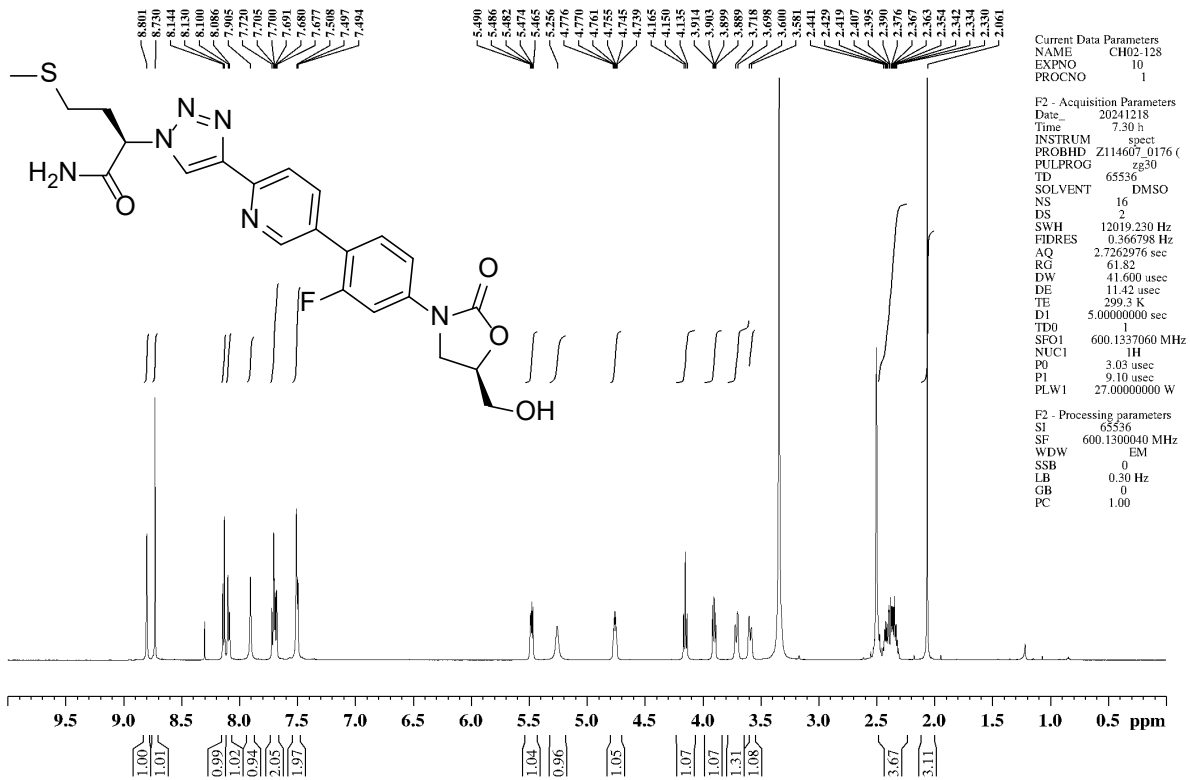

Current Data Parameters  
 NAME CH02-128  
 EXPNO 10  
 PROCNO 1

F2 - Acquisition Parameters  
 Date\_ 20241218  
 Time 7.50 h  
 INSTRUM spect  
 PROBHD Z114607\_0176 ( )  
 PULPROG zg30  
 TD 65536  
 SOLVENT DMSO  
 NS 16  
 DS 2  
 SWH 12019.230 Hz  
 FIDRES 0.366798 Hz  
 AQ 2.7262976 sec  
 RG 61.82  
 DW 41.600 usec  
 DE 11.42 usec  
 TE 299.3 K  
 D1 5.00000000 sec  
 TD0 1  
 SFO1 600.1337060 MHz  
 NUC1 1H  
 P0 3.03 usec  
 P1 9.10 usec  
 PLW1 27.00000000 W

F2 - Processing parameters  
 SI 65536  
 SF 600.1300040 MHz  
 WDW EM  
 SSB 0  
 LB 0.30 Hz  
 GB 0  
 PC 1.00

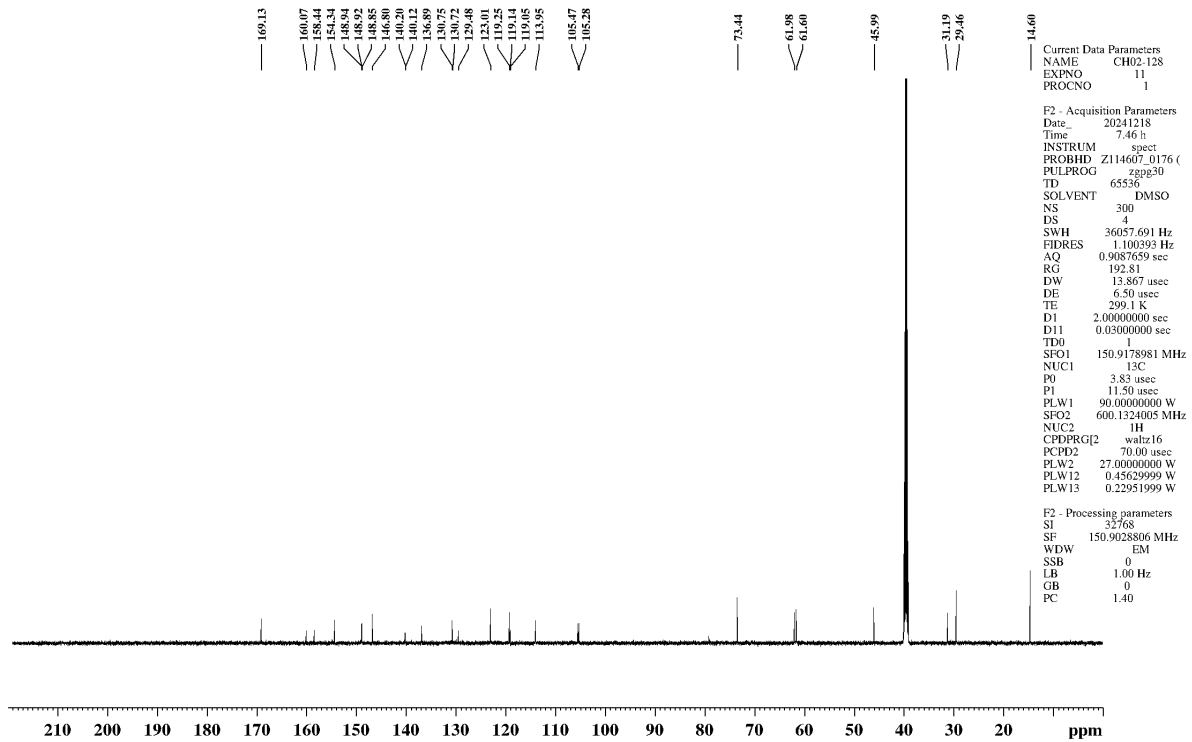

Current Data Parameters  
 NAME CH02-128  
 EXPNO 11  
 PROCNO 1

F2 - Acquisition Parameters  
 Date\_ 20241218  
 Time 7.46 h  
 INSTRUM spect  
 PROBHD Z114607\_0176 ( )  
 PULPROG zgpg30  
 TD 65536  
 SOLVENT DMSO  
 NS 300  
 DS 4  
 SWH 36057.691 Hz  
 FIDRES 1.100393 Hz  
 AQ 0.9087659 sec  
 RG 192.81  
 DW 13.867 usec  
 DE 6.50 usec  
 TE 299.1 K  
 D1 2.00000000 sec  
 D11 0.02000000 sec  
 TD0 1  
 SFO1 150.9178981 MHz  
 NUC1 13C  
 P0 3.83 usec  
 P1 11.50 usec  
 PLW1 90.00000000 W  
 SFO2 600.1324005 MHz  
 NUC2 1H  
 CPDPRG2 waltz16  
 PCPD2 70.00 usec  
 PLW2 27.00000000 W  
 PLW12 0.45629999 W  
 PLW13 0.22951999 W

F2 - Processing parameters  
 SI 32768  
 SF 150.9028806 MHz  
 WDW EM  
 SSB 0  
 LB 1.00 Hz  
 GB 0  
 PC 1.40

**<sup>1</sup>H and <sup>13</sup>C NMR of 25 (600 MHz, DMSO-d<sub>6</sub>):**

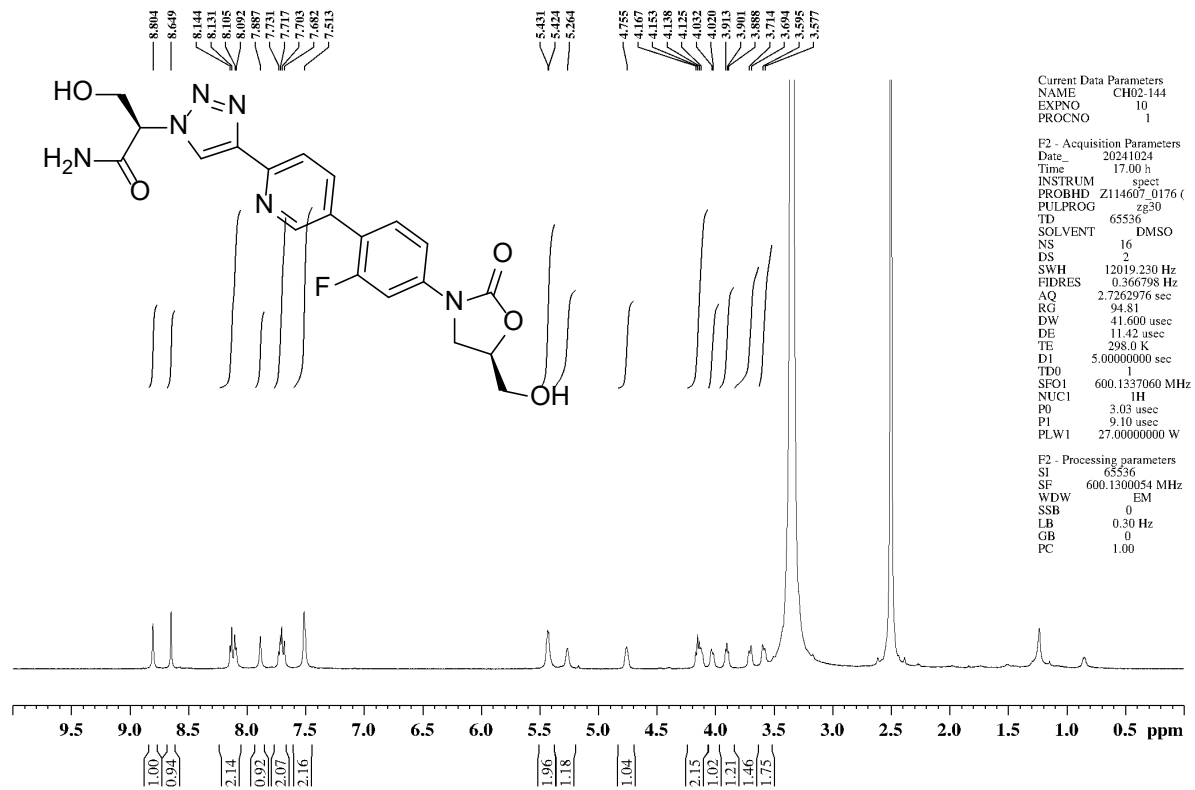

Current Data Parameters  
 NAME CH02-144  
 EXPNO 10  
 PROCNO 1

F2 - Acquisition Parameters  
 Date\_ 20241024  
 Time 17.00 h  
 INSTRUM spect  
 PROBH0 Z114607\_0176 (Z114607\_0176)  
 PULPROG zg30  
 TD 65536  
 SOLVENT DMSO  
 NS 16  
 DS 2  
 SWH 12019.230 Hz  
 FIDRES 0.366798 Hz  
 AQ 2.7262976 sec  
 RG 94.81  
 DW 41.600 usec  
 DE 11.42 usec  
 TE 298.0 K  
 D1 5.00000000 sec  
 TD0 1  
 SFO1 600.1337060 MHz  
 NUC1 <sup>1</sup>H  
 P0 3.03 usec  
 P1 9.10 usec  
 PLW1 27.00000000 W

F2 - Processing parameters  
 SI 65536  
 SF 600.1300054 MHz  
 WDW EM  
 SSB 0  
 LB 0.30 Hz  
 GB 0  
 PC 1.00

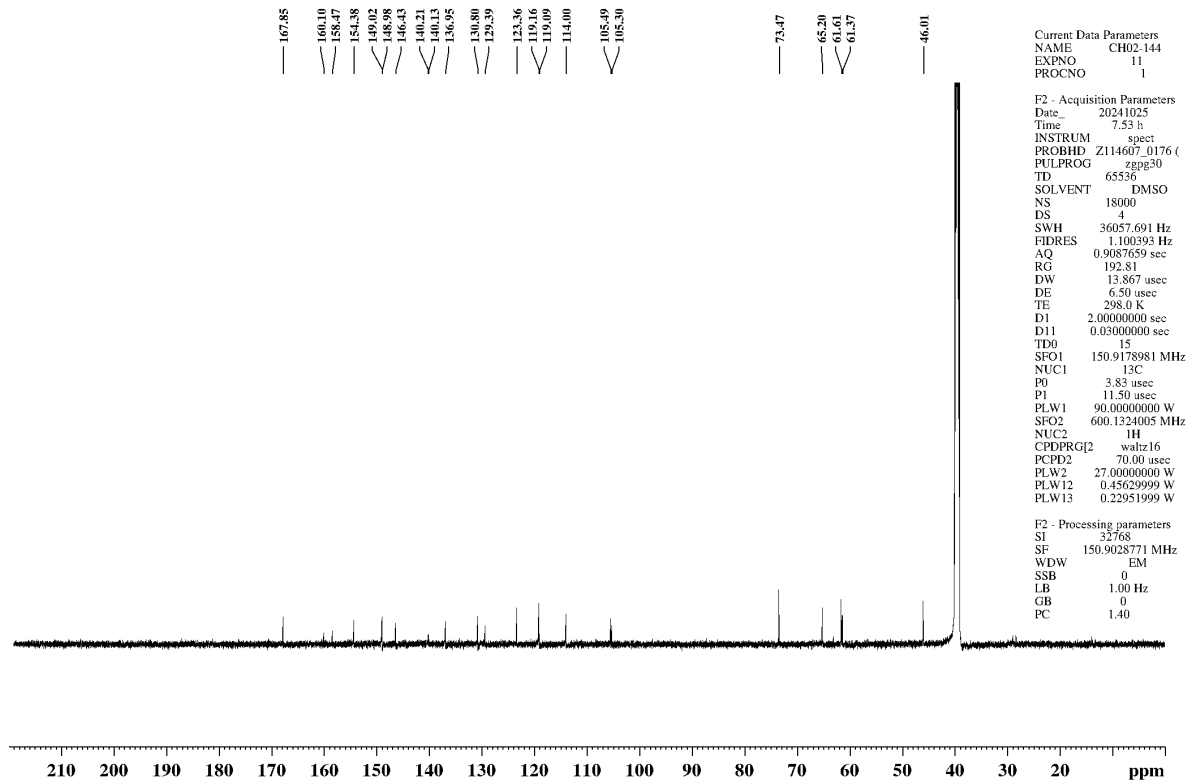

Current Data Parameters  
 NAME CH02-144  
 EXPNO 11  
 PROCNO 1

F2 - Acquisition Parameters  
 Date\_ 20241025  
 Time 7.53 h  
 INSTRUM spect  
 PROBH0 Z114607\_0176 (Z114607\_0176)  
 PULPROG zgpg30  
 TD 65536  
 SOLVENT DMSO  
 NS 18000  
 DS +  
 SWH 36057.691 Hz  
 FIDRES 1.100393 Hz  
 AQ 0.9087659 sec  
 RG 192.81  
 DW 13.867 usec  
 DE 6.50 usec  
 TE 298.0 K  
 D1 2.00000000 sec  
 D11 0.03000000 sec  
 TD0 15  
 SFO1 150.9173981 MHz  
 NUC1 <sup>13</sup>C  
 P0 3.83 usec  
 P1 11.50 usec  
 PLW1 90.00000000 W  
 SFO2 600.1324005 MHz  
 NUC2 <sup>1</sup>H  
 CPDPRG2 waltz16  
 PCPD2 70.00 usec  
 PLW2 27.00000000 W  
 PLW12 0.45629999 W  
 PLW13 0.22951999 W

F2 - Processing parameters  
 SI 32768  
 SF 150.9028771 MHz  
 WDW EM  
 SSB 0  
 LB 1.00 Hz  
 GB 0  
 PC 1.40

## References

1. M. N. Gandy, M. G. Corral, J. S. Mylne and K. A. Stubbs. *Org. Biomol. Chem.* 2015, **13**, 5586-5590.
2. K. V. Sukhoverkov, M. G. Corral, J. Leroux, J. Haywood, P. Johnen, T. Newton, K. A. Stubbs and J. S. Mylne, *RSC Adv.*, 2021, **11**, 8459-8467.
3. T. Ikawa, H. Sajiki and K. Hirota, *Tetrahedron*, 2005, **61**, 2217.
4. G. Li, B-K. Yuan, W. Tang, H-Y. Zhao, Z-Y. Lin and H-H. Huang, *Chem. Pharm. Bull.*, 2015, **63**, 143.4.
5. A. Spaulding, K. Takroui, P. Mahalingam, D. C. Cleary, H. D. Cooper, P. Zucchi, W. Tear, B. Koleva, P. J. Beuning, E. B. Hirsch and J. B. Aggen, *Bioorg. Med. Chem. Lett.*, 2017, **27**, 5310.
6. K. V. Sukhoverkov, K. J. Breese, A. W. Debowski, M. W. Murcha, K. A. Stubbs and J. S. Mylne, *RSC Chem. Biol.*, 2022, **3**, 37.
7. Clinical and Laboratory Standards Institute, *Methods for Dilution Antimicrobial Susceptibility Tests for Bacteria that Grow Aerobically; Approved Standard—Tenth Edition*, Clinical and Laboratory Standards Institute, Bruce, PA, 2015.
8. S. Ladouceur, A. M. Soliman and E. Zysman-Colman, *Synthesis*, 2011, **2011**, 3604-3611.
9. G. M. Fedorovich, Y. Zhengyu, L. Jinqian and W. Qian, US Pat., 20100069441A1, 2010.
